# Supplementary material for: Efficient Pd(ii)-catalyzed regioselective ortho-halogenation of arylcyanamides
Source: Royal Society of Chemistry journal article supplement (doi:10.1039/d1nj01998h), 2021-01-01

## Supporting Information

### **Efficient Pd(II)-Catalyzed Regioselective Ortho-halogenation of Arylcyanamide**

**S N Murthy Boddapati,<sup>a,b</sup> Ramana Tamminana,<sup>c</sup> M. Mujahid Alam,<sup>d</sup>  
Sailaja Gugulothu,<sup>la</sup> Ravi Varala,<sup>e</sup> Hari Babu Bollikolla<sup>a\*</sup>**

<sup>a</sup>*Department of Chemistry, Acharya Nagarjuna University, NNagar-522 510, Guntur, AP-India*

<sup>b</sup>*Department of Chemistry, C R Reddy College, P G Courses, Eluru-534007, AP-India*

<sup>c</sup>*Department of chemistry, GITAM Deemed to be University, Bengaluru Campu, Karnataka, India-562163.*

<sup>d</sup>*Department of Chemistry, College of Science, King Khalid University, PO Box 9004, Abha 61413, Saudi Arabia*

<sup>e</sup>*Scrips Pharma, Hyderabad, Telangana, India.*

|   | Contents                                                | Page    |
|---|---------------------------------------------------------|---------|
| 1 | General Information                                     | S1      |
| 2 | Preparation of Deuterated bromocyanamide                | S2      |
| 3 | Characterization Data of the Products and References    | S2-S11  |
| 4 | Scans of <sup>1</sup> H and <sup>13</sup> C NMR Spectra | S12-S76 |

**General Information:** PdCl<sub>2</sub>(98%), CuCl<sub>2</sub>(98%), Pd(OAc)<sub>2</sub>(98%), NBS, CH<sub>3</sub>CN, Toluene, THF, DME, DCE, BHT, CH<sub>3</sub>COOAg, TFA, 4-*t*-BuPhenol, PTSA, were procured from Aldrich and utilized with no further purification. The solvents were dried according to the standard processes before use. Varian (400 MHz) spectrometer was employed to record <sup>1</sup>H and <sup>13</sup>C NMR spectra. Infrared (IR) spectra recorded on a Perkin Elmer Spectrum One FT-IR spectrometer. In the experimental procedure, a VKSI Medico Centrifuge machine was used for the synthesis of substituted 2-halo arylcyanamide

### Preparation of Deuterated bromocyanamide:

Duetero Phenylcyanamide was completely dissolved in DCE (3 mL) at room temperature. To the reaction mixture Pd(OAc)<sub>2</sub> (5 mol %, 11.2 mg), NBS (1 mmol), BHT (3 mmol, 660 mg) were added consecutively at room temperature and stirring was continued for 0.5 h. Then the reaction temperature rises to 80 °C and stirred for 8 h. After completion of the reaction (monitored by TLC), to separate the organic layer the reaction mixture was washed with water (3 X 5 mL) and brine solution (3 X 5 mL). A Rotary evaporator was used to concentrate the clear organic layer and the crude mixture was purified by silica gel (60-120 mesh) column chromatography using ethylacetate in hexane as eluent to afford the brominated cyanamide as solid.

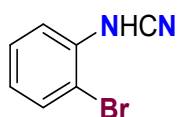

**2-Bromophenylcyanamide 2a:**<sup>1,3</sup>White solid;Analytical TLC on silica gel, 1:10 ethyl acetate/hexane  $R_f = 0.8$ ; yield 91%;mp 144-145 °C; <sup>1</sup>H NMR (400 MHz, CDCl<sub>3</sub>)  $\delta$  7.38-7.33 (m, 2H), 6.81 (d,  $J = 8.4$  Hz, 1H), 6.72-6.67 (m, 1H); <sup>13</sup>C NMR (100 MHz, CDCl<sub>3</sub>)  $\delta$  139.6, 137.9, 130.3, 128.6, 121.0, 118.9, 114.7;FT-IR (KBr) 3423, 3048, 2217, 1656, 1578, 1490, 1438, 1409, 1288, 1261, 1078, 1023, 823. Anal. Calcd. for C<sub>7</sub>H<sub>5</sub>BrN<sub>2</sub>: C, 42.67; H, 2.56; Br, 40.55; N, 14.22. Found: C, 42.90; H, 2.54; N, 14.14.

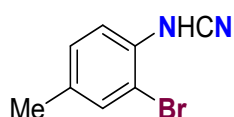

**2-Bromo-4-methylphenylcyanamide 2b:**White solid;Analytical TLC on silica gel, 1:19 ethyl acetate/hexane  $R_f = 0.8$ ; yield 94%;mp 147-148 °C; <sup>1</sup>H NMR (400 MHz, CDCl<sub>3</sub>)  $\delta$  7.33 (s, 1H), 7.14-7.05 (m, 2H), 5.33 (br s, 1H, 1NH), 2.32 (s, 3H); <sup>13</sup>C NMR (100 MHz, CDCl<sub>3</sub>)  $\delta$  139.4, 137.4, 133.6, 133.1, 123.4, 121.4, 115.5, 20.6; FT-IR (KBr) 3368, 3077, 2951, 2212, 1599, 1533, 1441, 1287, 1205, 823 cm<sup>-1</sup>. Anal. Calcd. for C<sub>8</sub>H<sub>7</sub>BrN<sub>2</sub>: C, 45.53; H, 3.34; Br, 37.86; N, 13.27. Found: C, 45.85; H, 3.30; N, 13.16.

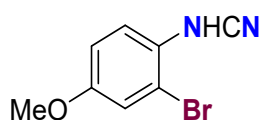

**2-Bromo-4-methoxyphenylcyanamide 2c:** White solid; Analytical TLC on silica gel, 1:10 ethyl acetate/hexane  $R_f = 0.7$ ; yield 95%; mp 151-152 °C;  $^1\text{H}$  NMR (400 MHz, DMSO)  $\delta$  7.17 (d,  $J = 10.4$  Hz, 1H), 7.15-6.83 (m, 2H), 3.80 (s, 3H);  $^{13}\text{C}$  NMR (100 MHz,  $\text{CDCl}_3$ )  $\delta$  159.6, 138.4, 136.7, 132.7, 116.4, 115.6, 115.0, 55.5; FT-IR (KBr) 3412, 3033, 2898, 2225, 1602, 1583, 1491, 1287, 1146, 1027, 826  $\text{cm}^{-1}$ . Anal. Calcd. for  $\text{C}_8\text{H}_7\text{BrN}_2\text{O}$ : C, 42.32; H, 3.11; Br, 35.19; N, 12.34; O, 7.05. Found: C, 42.60; H, 3.08; N, 12.25.

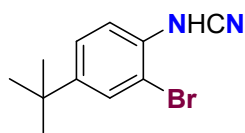

**4-tert-Butyl-2-bromophenylcyanamide 2d:** White solid; Analytical TLC on silica gel, 1:10 ethyl acetate/hexane  $R_f = 0.8$ ; yield 87%; mp 144-145 °C;  $^1\text{H}$  NMR (400 MHz,  $\text{CDCl}_3$ )  $\delta$  7.30 (s, 1H), 7.03 (d,  $J = 8.0$  Hz, 1H), 6.91 (d,  $J = 8.4$  Hz, 1H), 6.74 (br s, 1H), 1.27 (s, 9H);  $^{13}\text{C}$  NMR (100 MHz,  $\text{CDCl}_3$ )  $\delta$  139.4, 137.8, 132.4, 128.7, 124.9, 117.5, 110.6, 21.4; FT-IR (KBr) 3405, 3201, 2922, 2858, 2222, 1654, 1607, 1581, 1453, 1410, 1389, 1268, 1155, 1018  $\text{cm}^{-1}$ . Anal. Calcd. for  $\text{C}_{11}\text{H}_{13}\text{BrN}_2$ : C, 52.19; H, 5.18; Br, 31.57; N, 11.07. Found: C, 52.50; H, 5.16; N, 11.00.

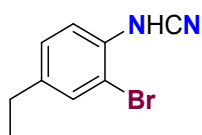

**2-Bromo-4-ethylphenylcyanamide 2e:** White solid; Analytical TLC on silica gel, 1:10 ethyl acetate/hexane  $R_f = 0.8$ ; yield 91%; mp 139-140 °C;  $^1\text{H}$  NMR (400 MHz,  $\text{CDCl}_3$ )  $\delta$  7.42 (d,  $J = 8.4$  Hz, 1H), 7.37-7.35 (m, 1H), 7.15 (d,  $J = 8.0$  Hz, 1H), 6.00 (br s, 1H), 2.62-2.56 (q, 2H), 1.20 (t,  $J = 7.6$  Hz, 3H);  $^{13}\text{C}$  NMR (100 MHz,  $\text{CDCl}_3$ )  $\delta$  141.5, 135.8, 132.4, 128.3, 126.4, 122.8, 117.1, 26.3, 14.3; FT-IR (KBr) 3250, 3090, 2928, 2218, 1672, 1610, 1574, 1496, 1449, 1309, 1246, 1125, 1096  $\text{cm}^{-1}$ . Anal. Calcd. for  $\text{C}_9\text{H}_9\text{BrN}_2$ : C, 48.02; H, 4.03; Br, 35.50; N, 12.45. Found: C, 48.36; H, 4.00; N, 12.37.

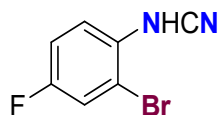

**2-Bromo-4-fluorophenylcyanamide 2f:** White solid; Analytical TLC on silica gel, 1:10 ethyl acetate/hexane  $R_f = 0.7$ ; yield 89%; mp 144-145 °C;  $^1\text{H}$  NMR (400 MHz,  $\text{CDCl}_3$ )  $\delta$  7.49 (s, 1H), 7.36 (d,  $J = 7.6$  Hz, 2H);  $^{13}\text{C}$  NMR (100 MHz,  $\text{CDCl}_3$ )  $\delta$  165.1, 141.3, 133.5, 128.9, 128.4, 124.5, 115.8; FT-IR (KBr) 3423, 3017, 2205, 1601, 1491, 1287, 1027, 808  $\text{cm}^{-1}$ . Anal.

Calcd. for  $C_7H_4BrFN_2$ : C, 39.10; H, 1.88; Br, 37.16; F, 8.84; N, 13.03. Found: C, 39.40; H, 1.86; N, 12.92.

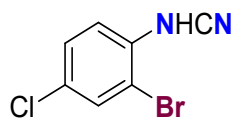

**2-Bromo-4-chlorophenylcyanamide 2g:** White solid; Analytical TLC on silica gel, 1:10 ethyl acetate/hexane  $R_f = 0.7$ ; yield 90%; mp 142-143 °C;  $^1H$  NMR (400 MHz,  $CDCl_3$ )  $\delta$  7.40-7.31 (m, 3H), 5.55 (br s, 1H, 1NH);  $^{13}C$  NMR (100 MHz,  $CDCl_3$ )  $\delta$  139.1, 137.2, 130.8, 130.0, 124.1, 122.2, 115.2; FT-IR (KBr) 3323, 3046, 3007, 2207, 1621, 1491, 1287, 1146, 1027, 828  $cm^{-1}$ . Anal. Calcd. for  $C_7H_4BrClN_2$ : C, 36.32; H, 1.74; Br, 34.52; Cl, 15.32; N, 12.10. Found: C, 36.62; H, 1.72; N, 12.09.

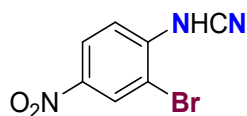

**2-Bromo-4-nitrophenylcyanamide 2h:** White solid; Analytical TLC on silica gel, 1:4 ethyl acetate/hexane  $R_f = 0.6$ ; yield 75%; mp 154-155 °C;  $^1H$  NMR (400 MHz,  $CDCl_3$ )  $\delta$  8.11 (d,  $J = 9.6$  Hz, 1H), 7.38-7.33 (m, 1H), 6.81 (d,  $J = 8.4$  Hz, 1H);  $^{13}C$  NMR (100 MHz,  $CDCl_3$ )  $\delta$  146.5, 138.4, 137.7, 136.9, 125.6, 122.2, 116.8; FT-IR (KBr) 3426, 3082, 3005, 2234, 1657, 1504, 1438, 1325, 1216, 1099, 829  $cm^{-1}$ . Anal. Calcd. for  $C_7H_4BrN_3O_2$ : C, 34.74; H, 1.67; Br, 33.01; N, 17.36; O, 13.22; Found: C, 34.99; H, 1.65; N, 17.29.

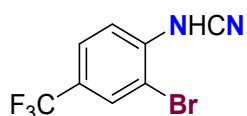

**2-Bromo-4-(trifluoromethyl)phenylcyanamide 2i:** White solid; Analytical TLC on silica gel, 1:5 ethyl acetate/hexane  $R_f = 0.6$ ; yield 78%; mp 155-157 °C;  $^1H$  NMR (400 MHz,  $CDCl_3$ )  $\delta$  7.84 (s, 1 H), 7.38-7.33 (m, 1H), 6.72-6.68 (m, 1H);  $^{13}C$  NMR (100 MHz,  $CDCl_3$ )  $\delta$  138.4, 136.7, 134.0, 132.7, 132.1, 115.6, 115.0, 90.1; FT-IR (KBr) 3426, 3007, 2238, 2219, 2036, 1631, 1567, 1491, 1287, 1250, 1146, 1027, 896  $cm^{-1}$ . Anal. Calcd. for  $C_8H_4BrF_3N_2$ : C, 36.25; H, 1.52; Br, 30.15; F, 21.51; N, 10.57. Found: C, 36.55; H, 1.49; N, 10.48.

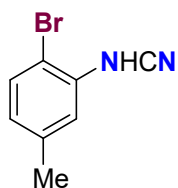

**2-Bromo-5-methylphenylcyanamide 2j:** White solid; Analytical TLC on silica gel, 1:10 ethyl acetate/hexane  $R_f = 0.8$ ; yield 93%; mp 139-140 °C;  $^1\text{H}$  NMR (400 MHz,  $\text{CDCl}_3$ )  $\delta$  7.33 (s, 1H), 7.14-7.05 (m, 2H);  $^{13}\text{C}$  NMR (100 MHz,  $\text{CDCl}_3$ )  $\delta$  139.4, 137.4, 134.8, 133.6, 133.1, 130.5, 115.5, 20.6; FT-IR (KBr) 3250, 3090, 2928, 1672, 1610, 1574, 1496, 1449, 1309, 1246, 1125, 1096  $\text{cm}^{-1}$ . Anal. Calcd. for  $\text{C}_8\text{H}_7\text{BrN}_2$ : C, 45.53; H, 3.34; Br, 37.86; N, 13.27. Found: C, 45.80; H, 3.31; N, 13.20.

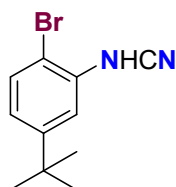

**5-tert-Butyl-2-bromophenylcyanamide 2k:** White solid; Analytical TLC on silica gel, 1:10 ethyl acetate/hexane  $R_f = 0.8$ ; yield 85%; mp 141-142 °C;  $^1\text{H}$  NMR (400 MHz,  $\text{CDCl}_3$ )  $\delta$  7.38-7.33 (m, 2H), 6.81 (d,  $J = 8.4$  Hz, 1H), 1.26 (s, 9H);  $^{13}\text{C}$  NMR (100 MHz,  $\text{CDCl}_3$ )  $\delta$  142.8, 135.2, 134.4, 130.0, 129.5, 128.7, 92.5, 34.5, 30.4; FT-IR (KBr) 3250, 3090, 2928, 1672, 1610, 1574, 1496, 1449, 1309, 1246, 1125, 1096  $\text{cm}^{-1}$ . Anal. Calcd. for  $\text{C}_{11}\text{H}_{13}\text{BrN}_2$ : C, 52.19; H, 5.18; Br, 31.57; N, 11.07. Found: C, 52.39; H, 5.16; N, 11.00.

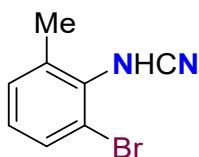

**2-bromo-6-methylphenylcyanamide 2l:** Gummy, Analytical TLC on silica gel, 1:19 ethyl acetate/hexane  $R_f = 0.8$ ; yield 82%;  $^1\text{H}$  NMR (400 MHz,  $\text{CDCl}_3$ )  $\delta$  7.27-7.21 (m, 1H), 7.17-7.12 (m, 2H), 6.09 (br s, 1NH), 2.14 (s, 3H);  $^{13}\text{C}$  NMR (100 MHz,  $\text{CDCl}_3$ )  $\delta$  147.0, 139.6, 137.8, 134.5, 130.9, 129.9, 117.0, 20.6; FT-IR (KBr) 3412, 3074, 2867, 2223, 1690, 1435, 1379, 1229, 1125, 1036, 941, 875  $\text{cm}^{-1}$ . Anal. Calcd. for  $\text{C}_8\text{H}_7\text{BrN}_2$ : C, 45.53; H, 3.34; Br, 37.86; N, 13.27. Found: C, 45.73; H, 3.32; N, 13.20.

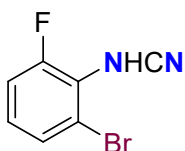

**2-bromo-6-fluorophenylcyanamide 2m:** Gummy, Analytical TLC on silica gel, 1:19 ethyl acetate/hexane  $R_f = 0.8$ ; yield 72%;  $^1\text{H}$  NMR (400 MHz,  $\text{CDCl}_3$ )  $\delta$  7.37-7.33 (m, 1H), 6.81 (d,  $J = 7.6$  Hz, 1H), 6.72-6.68 (m, 1H), 6.07 (br s, 1NH);  $^{13}\text{C}$  NMR (100 MHz,  $\text{CDCl}_3$ )  $\delta$  149.6, 141.6, 136.7, 134.0, 132.1, 126.1, 122.2; FT-IR (KBr) 3412, 3074, 2867, 2223, 1690,

1435, 1379, 1229, 1125, 1036, 941, 875  $\text{cm}^{-1}$ . Anal. Calcd. for  $\text{C}_7\text{H}_4\text{BrFN}_2$ : C, 39.10; H, 1.88; Br, 37.16; F, 8.84; N, 13.03. Found: C, 39.40; H, 1.85; N, 12.94.

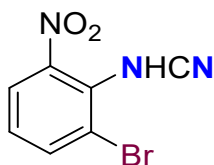

**2-bromo-6-nitrophenylcyanamide 2n:** White solid, Analytical TLC on silica gel, 1:4 ethyl acetate/hexane  $R_f = 0.5$ ; yield 64%; mp 141-142  $^{\circ}\text{C}$ ;  $^1\text{H}$  NMR (400 MHz,  $\text{CDCl}_3$ )  $\delta$  8.40 (d,  $J = 9.2$  Hz, 2 H), 7.65 (d,  $J = 8.8$  Hz, 1 H);  $^{13}\text{C}$  NMR (100 MHz,  $\text{CDCl}_3$ )  $\delta$  149.6, 141.6, 136.7, 134.0, 132.1, 120.9, 115.1; FT-IR (KBr) 3375, 3065, 2215, 1656, 1564, 1490, 1379, 1229, 1125, 1036, 941, 832  $\text{cm}^{-1}$ . Anal. Calcd. for  $\text{C}_7\text{H}_4\text{BrN}_3\text{O}_2$ : C, 34.74; H, 1.67; Br, 33.01; N, 17.36; O, 13.22. Found: C, 34.98; H, 1.64; N, 17.30.

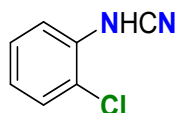

**2-Chlorophenylcyanamide 3a:**<sup>1,2,4</sup> Analytical TLC on silica gel, 1:19 ethyl acetate/hexane  $R_f = 0.8$ ; white solid; yield 95%;  $^1\text{H}$  NMR (400 MHz,  $\text{CDCl}_3$ )  $\delta$  7.42-7.38 (m, 2H), 7.36-7.31 (m, 2H);  $^{13}\text{C}$  NMR (100 MHz,  $\text{CDCl}_3$ )  $\delta$  137.8, 135.8, 130.9, 130.6, 130.1, 128.9, 94.0; FT-IR (KBr) 3265, 3064, 2263, 1693, 1489, 1070, 927, 909, 769  $\text{cm}^{-1}$ . Anal. Calcd. for  $\text{C}_7\text{H}_5\text{ClN}_2$ : C, 55.10; H, 3.30; Cl, 23.24; N, 18.36. Found: C, 55.37; H, 3.27; N, 18.30.

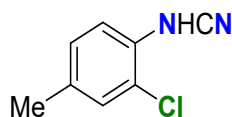

**2-Chloro-4-methylphenylcyanamide 3b:** Analytical TLC on silica gel, 1:19 ethyl acetate/hexane  $R_f = 0.8$ ; colorless liquid; yield 96%;  $^1\text{H}$  NMR (400 MHz,  $\text{CDCl}_3$ )  $\delta$  7.63 (s, 1H), 7.10-7.15 (m, 2H), 2.30 (s, 3H);  $^{13}\text{C}$  NMR (100 MHz,  $\text{CDCl}_3$ )  $\delta$  139.3, 134.6, 132.4, 127.5, 124.6, 120.0, 93.3, 21.3; FT-IR (KBr) 3208, 3087, 2899, 2222, 2036, 1587, 1496, 1458, 1265, 1212, 1104, 941, 808, 678  $\text{cm}^{-1}$ . Anal. Calcd. for  $\text{C}_8\text{H}_7\text{ClN}_2$ : C, 57.67; H, 4.23; Cl, 21.28; N, 16.81. Found: C, 57.93; H, 4.20; N, 16.70.

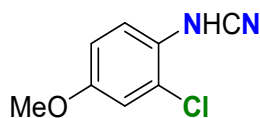

**2-Chloro-4-methoxyphenylcyanamide 3c:** Analytical TLC on silica gel, 1:19 ethyl acetate/hexane  $R_f = 0.8$ ; colorless solid; yield 97%;  $^1\text{H}$  NMR (400 MHz,  $\text{CDCl}_3$ )  $\delta$  7.15 (s, 1H), 7.13-7.10 (m, 2H), 3.30 (s, 3H);  $^{13}\text{C}$  NMR (100 MHz,  $\text{CDCl}_3$ )  $\delta$  165.7, 138.6, 133.8,

131.9, 127.8, 114.7, 91.8, 55.4; FT-IR (KBr) 3296, 3000, 2896, 2835, 2549, 2216, 2098, 1601, 1580, 1503, 1292, 1252, 1179, 1156, 1028, 927  $\text{cm}^{-1}$ . Anal. Calcd. for  $\text{C}_8\text{H}_7\text{ClN}_2\text{O}$ : C, 52.62; H, 3.86; Cl, 19.41; N, 15.34; O, 8.76. Found: C, 52.95; H, 3.83; N, 15.24.

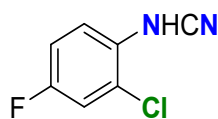

**2-Chloro-4-fluorophenylcyanamide 3d:** Analytical TLC on silica gel, 1:5 ethyl acetate/hexane  $R_f = 0.7$ ; oily liquid; yield 89%;  $^1\text{H}$  NMR (400 MHz,  $\text{CDCl}_3$ )  $\delta$  7.63 (s, 1H), 6.83-6.80 (m, 2H);  $^{13}\text{C}$  NMR (100 MHz,  $\text{CDCl}_3$ )  $\delta$  164.8 (d,  $J = 11$  Hz), 138.2, 136.5, 134.0, 133.7, 115.8 (d,  $J = 9$  Hz), 88.1; FT-IR (KBr) 3208, 3056, 2218, 2071, 1554, 1140, 909, 822, 770  $\text{cm}^{-1}$ . Anal. Calcd. for  $\text{C}_7\text{H}_4\text{ClFN}_2$ : C, 49.29; H, 2.36; Cl, 20.78; F, 11.14; N, 16.42. Found: C, 49.60; H, 2.31; N, 16.31.

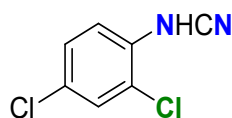

**2,4-Dichlorophenylcyanamide 3e:** Analytical TLC on silica gel, 1:4 ethyl acetate/hexane  $R_f = 0.7$ ; colorless liquid; yield 91%;  $^1\text{H}$  NMR (400 MHz,  $\text{CDCl}_3$ )  $\delta$  7.93 (s, 1H), 6.93-6.90 (m, 2H);  $^{13}\text{C}$  NMR (100 MHz,  $\text{CDCl}_3$ )  $\delta$  139.1, 137.1, 134.2, 132.5, 130.6, 129.1, 92.5; FT-IR (KBr) 3297, 3076, 2222, 2094, 1505, 1114, 929, 802, 790  $\text{cm}^{-1}$ . Anal. Calcd. for  $\text{C}_7\text{H}_4\text{Cl}_2\text{N}_2$ : C, 44.95; H, 2.16; Cl, 37.91; N, 14.98. Found: C, 45.25; H, 2.12; N, 14.88.

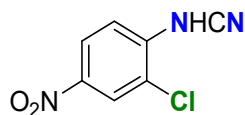

**2-Chloro-4-nitrophenylcyanamide 3f:** Analytical TLC on silica gel, 1:4 ethyl acetate/hexane  $R_f = 0.6$ ; white solid; yield 78%;  $^1\text{H}$  NMR (400 MHz,  $\text{CDCl}_3$ )  $\delta$  8.11 (d,  $J = 12$  Hz, 1H), 7.38-7.33 (m, 1H), 6.72-6.68 (m, 1H);  $^{13}\text{C}$  NMR (100 MHz,  $\text{CDCl}_3$ )  $\delta$  149.6, 138.4, 136.7, 134.0, 132.1, 120.1, 90.9; FT-IR (KBr) 3082, 2705, 2232, 2034, 1607, 1504, 1459, 1438, 1305, 1261, 1216, 1145, 1099, 970, 926  $\text{cm}^{-1}$ . Anal. Calcd. for  $\text{C}_7\text{H}_4\text{ClN}_3\text{O}_2$ : C, 42.55; H, 2.04; Cl, 17.94; N, 21.27; O, 16.20. Found: C, 42.80; H, 2.00; N, 21.17.

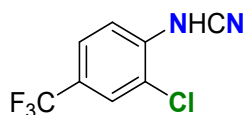

**2-Chloro-4-(trifluoromethyl)phenylcyanamide 3g:** Analytical TLC on silica gel, 1:5 ethyl acetate/hexane  $R_f = 0.6$ ; white solid; yield 82%;  $^1\text{H}$  NMR (400 MHz,  $\text{CDCl}_3$ )  $\delta$  7.84 (s, 1H), 7.38-7.33 (m, 1H), 6.72-6.68 (m, 1H);  $^{13}\text{C}$  NMR (100 MHz,  $\text{CDCl}_3$ )  $\delta$  138.4, 136.7, 134.0, 132.7, 132.1, 115.6, 115.0, 90.9; FT-IR (KBr) 3074, 2217, 2083, 1526, 1348, 1093, 973, 892,

850, 809, 736  $\text{cm}^{-1}$ . Anal. Calcd. for  $\text{C}_8\text{H}_4\text{ClF}_3\text{N}_2$ : C, 43.56; H, 1.83; Cl, 16.07; F, 25.84; N, 12.70. Found: C, 43.86; H, 1.80; N, 12.62.

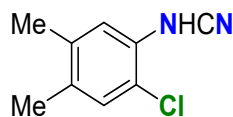

**2-Chloro-4,5-dimethylphenylcyanamide 3h:** Analytical TLC on silica gel, 1:19 ethyl acetate/hexane  $R_f = 0.9$ ; white solid; yield 98%;  $^1\text{H}$  NMR (400 MHz,  $\text{CDCl}_3$ )  $\delta$  7.46 (s, 1H), 7.01 (s, 1H), 2.34 (s, 3H), 2.30 (s, 3H);  $^{13}\text{C}$  NMR (100 MHz,  $\text{CDCl}_3$ )  $\delta$  139.6, 137.8, 134.5, 133.3., 130.9, 129.9, 90.6, 20.6, 18.2; FT-IR (KBr) 3265, 3065, 2920, 2857, 2234, 2085, 1490, 1435, 1379, 1229, 1125, 1036, 941, 901, 875  $\text{cm}^{-1}$ . Anal. Calcd. for  $\text{C}_9\text{H}_9\text{ClN}_2$ : C, 59.84; H, 5.02; Cl, 19.63; N, 15.51. Found: C, 60.18; H, 5.00; N, 15.41.

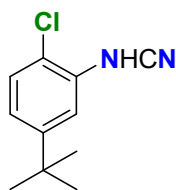

**5-Tert-butyl-2-chlorophenylcyanamide 3i:** Analytical TLC on silica gel, 1:19 ethyl acetate/hexane  $R_f = 0.9$ ; colorless solid; yield 88%;  $^1\text{H}$  NMR (400 MHz,  $\text{CDCl}_3$ )  $\delta$  7.38-7.33 (m, 2H), 6.81(d,  $J = 8.4$  Hz, 1H), 1.26 (s, 9H);  $^{13}\text{C}$  NMR (100 MHz,  $\text{CDCl}_3$ )  $\delta$  142.8, 135.2, 134.4, 130.0, 129.5, 128.7, 92.5, 34.5, 30.4; FT-IR (KBr) 3351, 3065, 3035, 2920, 2867, 2085, 1490, 1435, 1379, 1229, 1204, 1125, 1036, 941, 901, 875  $\text{cm}^{-1}$ . Anal. Calcd. for  $\text{C}_{11}\text{H}_{13}\text{ClN}_2$ : C, 63.31; H, 6.28; Cl, 16.99; N, 13.42. Found: C, 63.61; H, 6.26; N, 13.32.

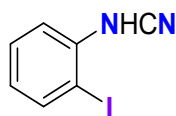

**2-Iodophenylcyanamide 4a:** Analytical TLC on silica gel, 1:19 ethyl acetate/hexane  $R_f = 0.8$ ; yield 91%;  $^1\text{H}$  NMR (400 MHz,  $\text{CDCl}_3$ )  $\delta$  7.42-7.38 (m, 2H), 7.36-7.31 (m, 2H), 5.82 (br s, 1H, NH);  $^{13}\text{C}$  NMR (100 MHz,  $\text{CDCl}_3$ )  $\delta$  140.8, 137.8, 130.9, 130.6, 130.1, 128.9, 94.0; FT-IR (KBr) 3350, 3064, 2222, 1693, 1489, 1250, 1070, 909, 569  $\text{cm}^{-1}$ . Anal. Calcd. for  $\text{C}_7\text{H}_5\text{IN}_2$ : C, 34.45; H, 2.07; N, 11.48. Found: C, 34.59; H, 2.05; N, 11.42.

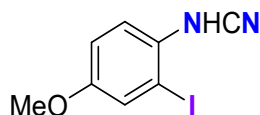

**2-Iodo-4-methoxyphenylcyanamide 4b:** Analytical TLC on silica gel, 1:19 ethyl acetate/hexane  $R_f = 0.8$ ; yield 92%;  $^1\text{H}$  NMR (400 MHz,  $\text{CDCl}_3$ )  $\delta$  7.15 (s, 1H), 7.13-7.10 (m, 2H), 5.37 (br s, 1H, 1NH), 3.30 (s, 3H);  $^{13}\text{C}$  NMR (100 MHz,  $\text{CDCl}_3$ )  $\delta$  164.1, 138.6, 133.8,



131.9, 127.8, 121.7, 91.8, 55.4; FT-IR (KBr) 3318, 3097, 2896, 2835, 2298, 1601, 1580, 1503, 1292, 1252, 1179, 1028, 927, 566  $\text{cm}^{-1}$ . Anal. Calcd. for  $\text{C}_8\text{H}_7\text{IN}_2\text{O}$ : C, 35.06; H, 2.57; N, 10.22. Found: C, 35.22; H, 2.54; N, 10.16.

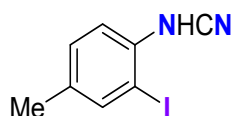

**2-Iodo-4-methylphenylcyanamide 4c:** Analytical TLC on silica gel, 1:19 ethyl acetate/hexane  $R_f = 0.8$ ; yield 89%;  $^1\text{H}$  NMR (400 MHz,  $\text{CDCl}_3$ )  $\delta$  7.63 (s, 1H), 7.10-7.15 (m, 2H), 2.30 (s, 3H);  $^{13}\text{C}$  NMR (100 MHz,  $\text{CDCl}_3$ )  $\delta$  142.3, 135.6, 132.4, 128.5, 124.6, 120.0, 94.3, 21.3; FT-IR (KBr) 3322, 3087, 2899, 2236, 1587, 1496, 1265, 1212, 1104, 941, 808, 578  $\text{cm}^{-1}$ . Anal. Calcd. for  $\text{C}_8\text{H}_7\text{IN}_2$ : C, 37.23; H, 2.73; N, 10.86. Found: C, 37.36; H, 2.71; N, 10.81.

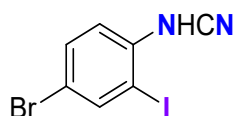

**4-Bromo-2-iodophenylcyanamide 4d:** Analytical TLC on silica gel, 1:24 ethyl acetate/hexane  $R_f = 0.7$ ; yield 90%;  $^1\text{H}$  NMR (400 MHz,  $\text{CDCl}_3$ )  $\delta$  7.93 (s, 1H), 6.93-6.90 (m, 2H), 5.82 (br s, 1H, 1NH);  $^{13}\text{C}$  NMR (100 MHz,  $\text{CDCl}_3$ )  $\delta$  139.1, 137.1, 134.2, 132.5, 130.6, 129.1, 92.5; FT-IR (KBr) 3399, 3076, 2214, 1670, 1505, 1250, 1114, 929, 802, 590  $\text{cm}^{-1}$ . Anal. Calcd. for  $\text{C}_7\text{H}_4\text{BrIN}_2$ : C, 30.19; H, 1.45; N, 10.06. Found: C, 30.32; H, 1.43; N, 10.00.

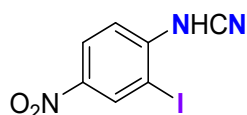

**2-Iodo-4-nitrophenylcyanamide 4e:** Analytical TLC on silica gel, 1:4 ethyl acetate/hexane  $R_f = 0.5$ ; yield 71%;  $^1\text{H}$  NMR (400 MHz,  $\text{CDCl}_3$ )  $\delta$  7.84 (s, 1H), 7.38-7.33 (m, 1H), 6.72-6.68 (m, 1H), 5.24 (s br, 1NH);  $^{13}\text{C}$  NMR (100 MHz,  $\text{CDCl}_3$ )  $\delta$  149.6, 141.6, 136.7, 134.0, 132.1, 115.1, 90.9; FT-IR (KBr) 3415, 3082, 2234, 1675, 1607, 1504, 1459, 1438, 1345, 1261, 1145, 1099, 870, 526  $\text{cm}^{-1}$ . Anal. Calcd. for  $\text{C}_7\text{H}_4\text{IN}_3\text{O}_2$ : C, 29.09; H, 1.39; N, 14.54. Found: C, 29.24; H, 1.36; N, 14.48.

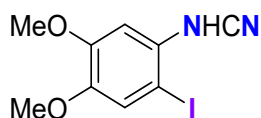

**2-iodo-4,5-dimethoxyphenylcyanamide 4f:** Analytical TLC on silica gel, 1:20 ethyl acetate/hexane  $R_f = 0.9$ ; yield 95%;  $^1\text{H}$  NMR (400 MHz,  $\text{CDCl}_3$ )  $\delta$  7.46 (s, 1H), 7.01 (s, 1H), 3.34 (s, 3H), 3.30 (s, 3H);  $^{13}\text{C}$  NMR (100 MHz,  $\text{CDCl}_3$ )  $\delta$  139.6, 137.8, 134.5, 130.9, 129.9,

113.9, 90.6, 56.6, 54.6; FT-IR (KBr) 3375, 3065, 2920, 2215, 1656, 1490, 1379, 1229, 1125, 1036, 941, 901, 675  $\text{cm}^{-1}$ . Anal. Calcd. for  $\text{C}_9\text{H}_9\text{IN}_2\text{O}_2$ : C, 35.55; H, 2.98; I, 41.73; N, 9.21; O, 10.52. Found: C, 35.95; H, 2.96; N, 9.14.

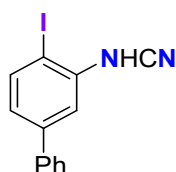

**6-Iodo-3-phenyl phenylcyanamide 4g:** Analytical TLC on silica gel, 1:20 ethyl acetate/hexane  $R_f = 0.9$ ; White solid; yield 88%;  $^1\text{H}$  NMR (400 MHz,  $\text{CDCl}_3$ )  $\delta$  7.40 (s, 1H), 7.30-7.19 (m, 5H), 7.04-7.01 (m, 2H), 6.81 (br s, 1H);  $^{13}\text{C}$  NMR (100 MHz,  $\text{CDCl}_3$ )  $\delta$  138.0, 137.4, 135.3, 134.1, 132.7, 129.6, 127.0, 126.7, 124.6, 115.3, 110.3; FT-IR (KBr) 3210, 2224, 1605, 1580, 1497, 1439, 1405, 1388, 1286, 1154, 1025  $\text{cm}^{-1}$ . Anal. Calcd. for  $\text{C}_{13}\text{H}_9\text{IN}_2$ : C, 48.77; H, 2.83; I, 39.64; N, 8.75. Found: C, 49.07; H, 2.80; N, 8.60.

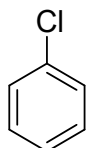

Chloro benzene: Analytical TLC on silica gel, 1:49 ethyl acetate/hexane  $R_f = 0.9$ ; Colorless liquid; yield 98%;  $^1\text{H}$ -NMR (400 MHz,  $\text{CDCl}_3$ )  $\delta$  7.37-7.33 (m, 2H), 7.29-7.25 (m, 3H); FT-IR (KBr) 3064, 2364, 2063, 1693, 1489, 1070, 927, 909, 769  $\text{cm}^{-1}$ .

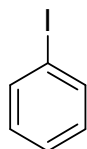

**Iodobenzene:** Analytical TLC on silica gel, Hexane  $R_f = 0.9$ ; colorless liquid; yield 92%;  $^1\text{H}$  NMR (400 MHz,  $\text{CDCl}_3$ )  $\delta$  7.65 (d,  $J = 8.4$  Hz, 2H), 7.28 (d,  $J = 9.6$  Hz, 2H); FT-IR (KBr) 3166, 2954, 2234, 1600, 1494, 1399, 1251, 1091, 1011, 820  $\text{cm}^{-1}$ .

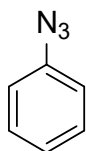

**Phenyl azide:** Analytical TLC on silica gel, Hexane  $R_f = 0.9$ ; colorless liquid; yield 90%;  $^1\text{H}$  NMR (400 MHz,  $\text{CDCl}_3$ )  $\delta$  8.11 (d,  $J = 9.2$  Hz, 2H), 7.61-7.43 (m, 3H); FT-IR (KBr) 3166, 2954, 2234, 1600, 1494, 1399, 1251, 1091, 1011, 820  $\text{cm}^{-1}$ .

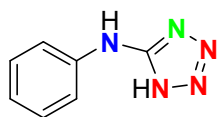

**N-Phenyl-1H-tetrazol-5-amine (8a):** Yield (90%), white solid, mp 167–168°C (mp 162–163°C<sup>34</sup>).  $R_f$ 0.6 (EtOAc–hexane, 3:7). IR spectrum,  $\nu$ ,  $\text{cm}^{-1}$ : 3987, 3350, 3064, 1693, 1587, 1250, 1148, 1070, 909, 764.  $^1\text{H}$  NMR spectrum,  $\delta$ , ppm: 7.97 (2H, br. s,  $\text{NH}_2$ ); 7.61–7.57 (2H, m, H Ar); 7.40–7.28 (2H, m, H Ar); 7.21–7.17 (1H, m, H Ar).

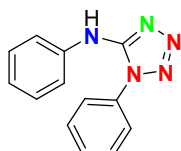

**N,1-Diphenyl-1H-tetrazol-5-amine (8b):** Yield 208 mg (88%), white solid, mp 198–199°C.  $R_f$ 0.7 (EtOAc–hexane, 3:7). IR spectrum,  $\nu$ ,  $\text{cm}^{-1}$ : 3426, 3097, 1645, 1631, 1567, 1512, 1491, 1287, 1250, 1146, 1027, 896.  $^1\text{H}$  NMR spectrum,  $\delta$ , ppm ( $J$ , Hz): 7.54–7.41 (7H, m, H Ar); 6.85 (3H, d,  $J = 8.8$ , H Ar); 6.02 (1H, br. s, NH).

#### References:

1. Ghosh, H.; Yella, R.; Ali, A. R.; Sahoo, S. K.; Patel, B. K. *Tetrahedron Lett.* **2009**, *50*, 2407-2410.
2. Pierron, P. *Bull. Soc. Chim. Fr.* **1907**, *35*, 1197-1204
3. T. Ramana, P. Saha, M. Das and T. Punniyamurthy, *Org. Lett.* 2010, **12**, 84.
4. Chun-Yen Chen, Fung Fuh Wonga, Jiann-Jyh Huang, Shao-Kai Lin, Mou-Yung Yeh *Tetrahedron Lett.* **2008**, *49*, 6505–6507

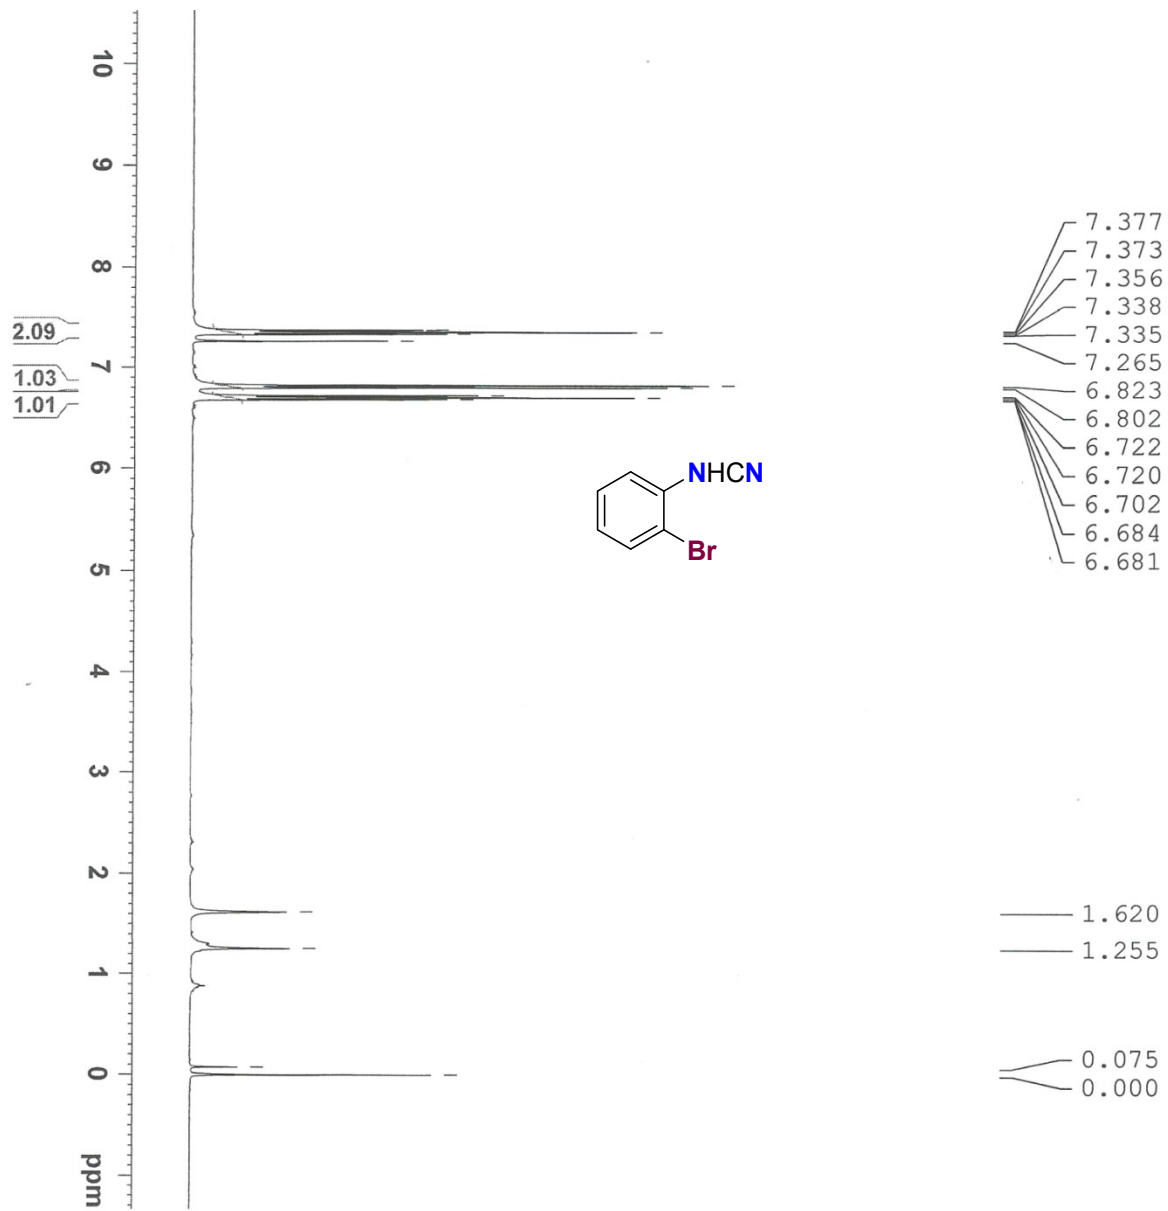

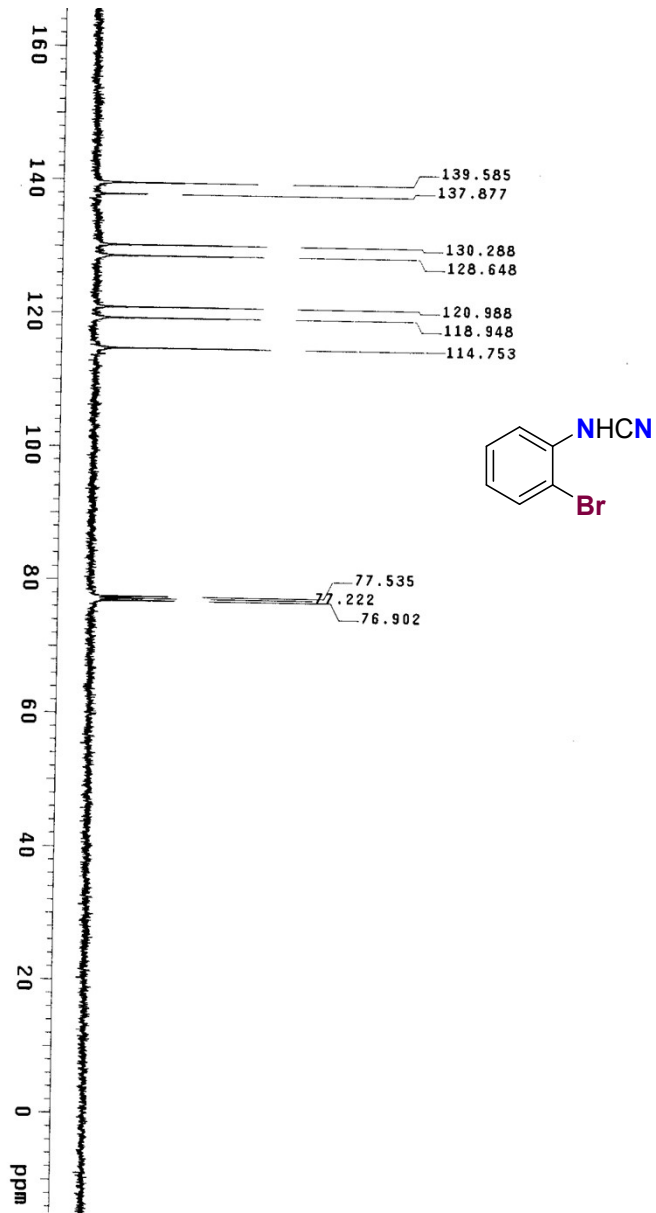

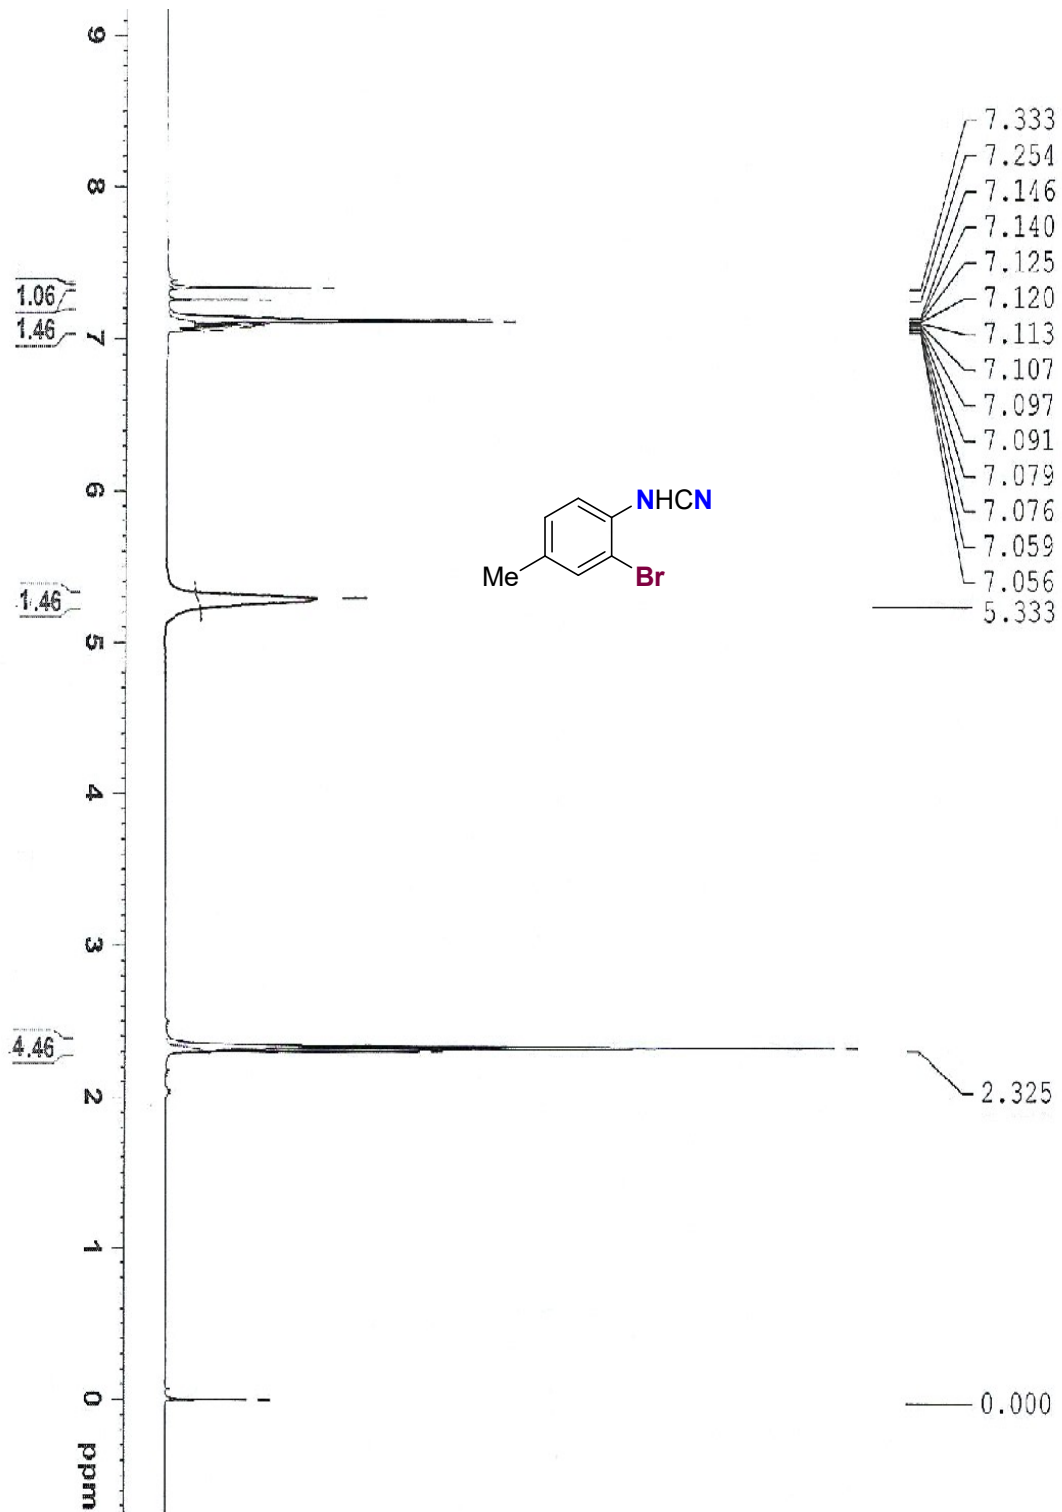

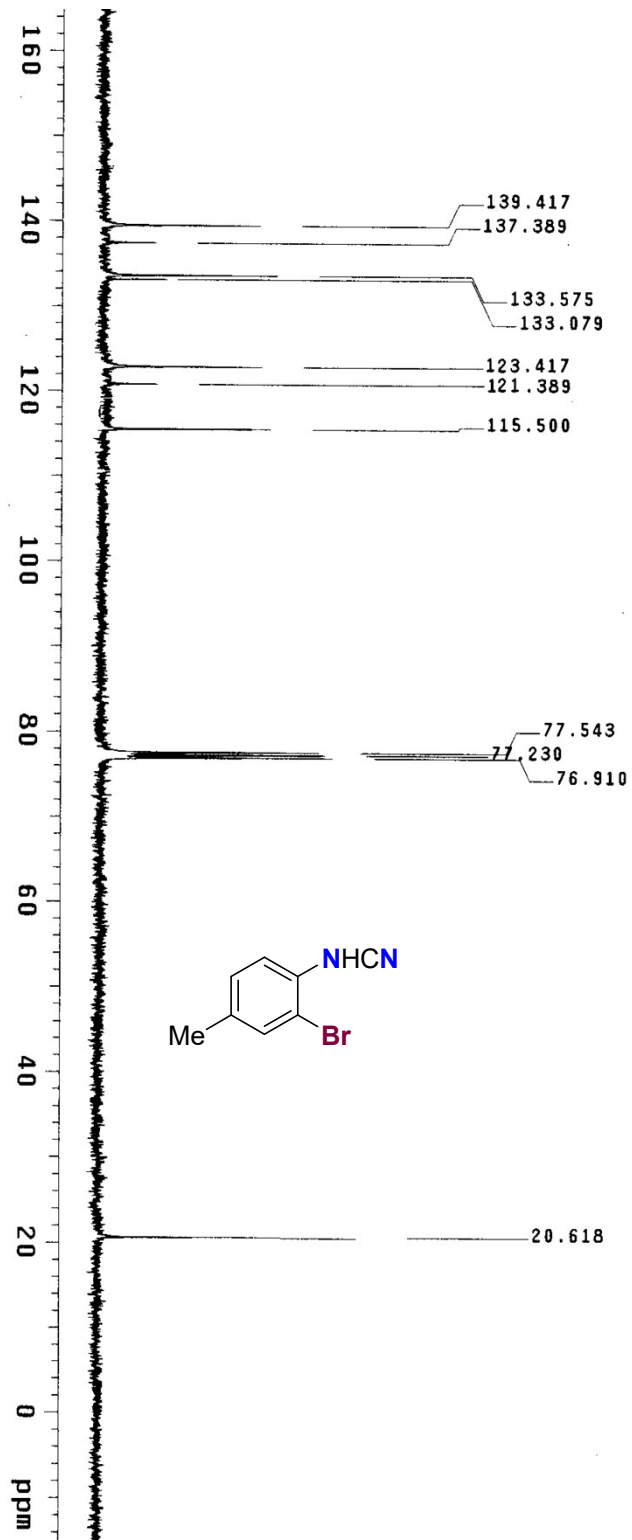

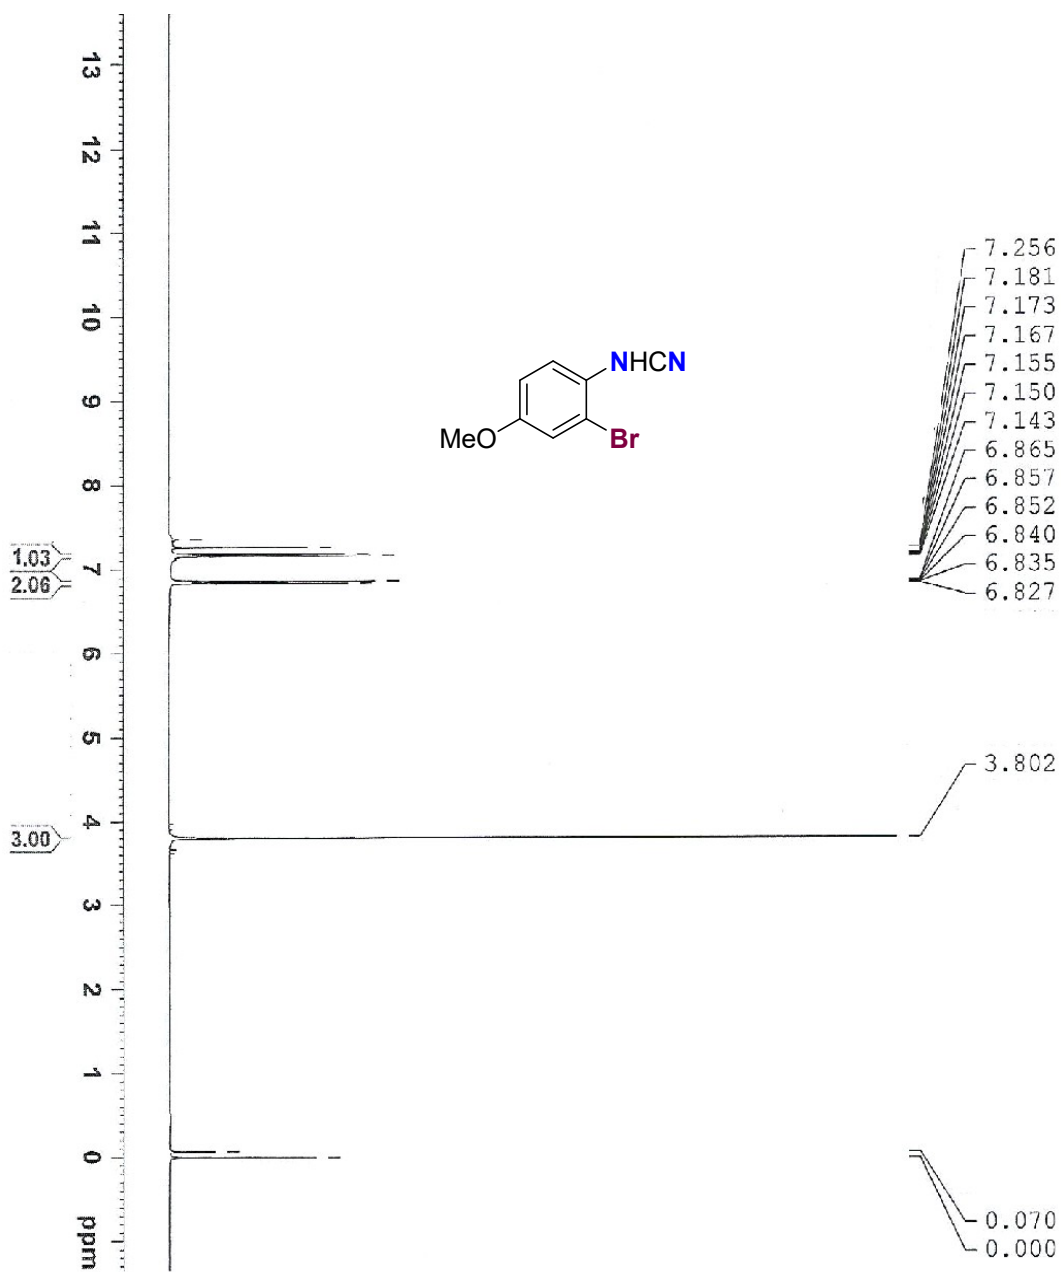



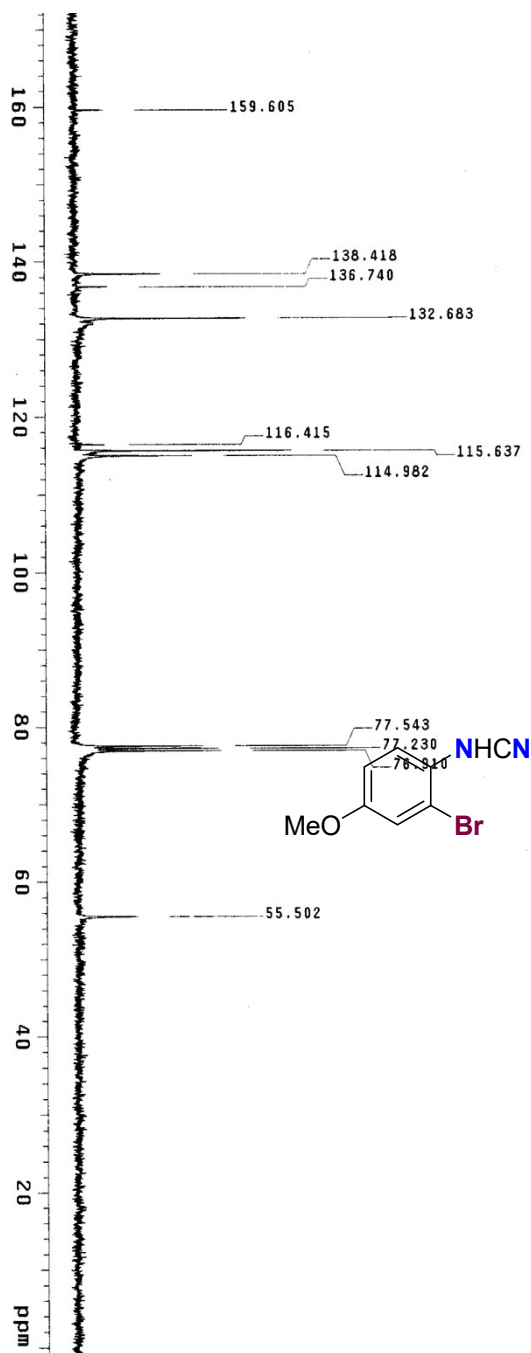

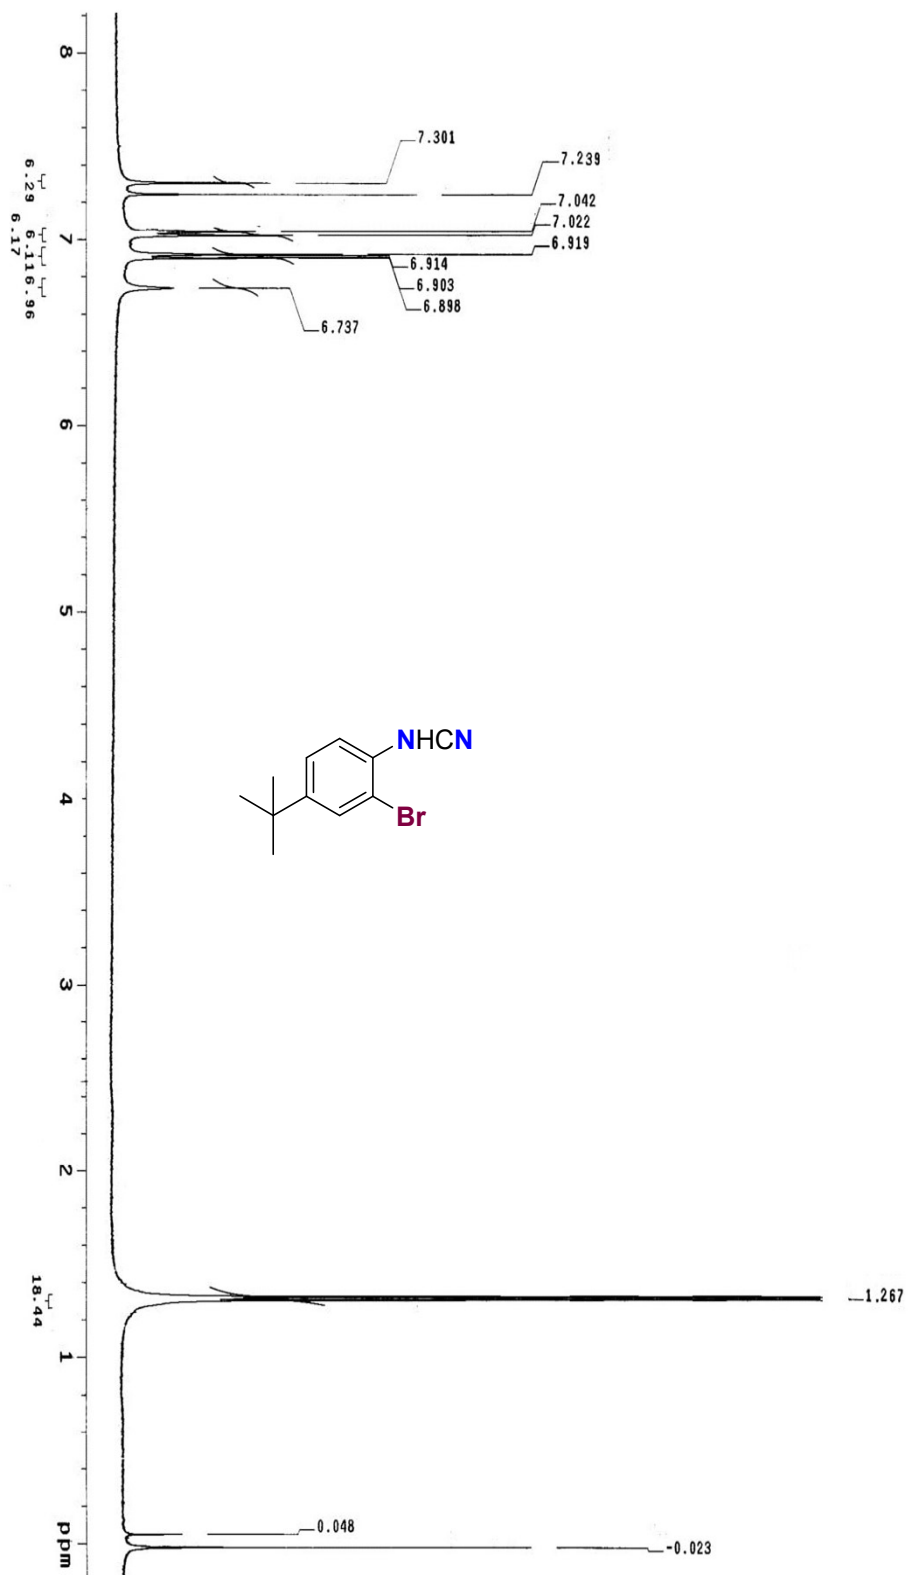

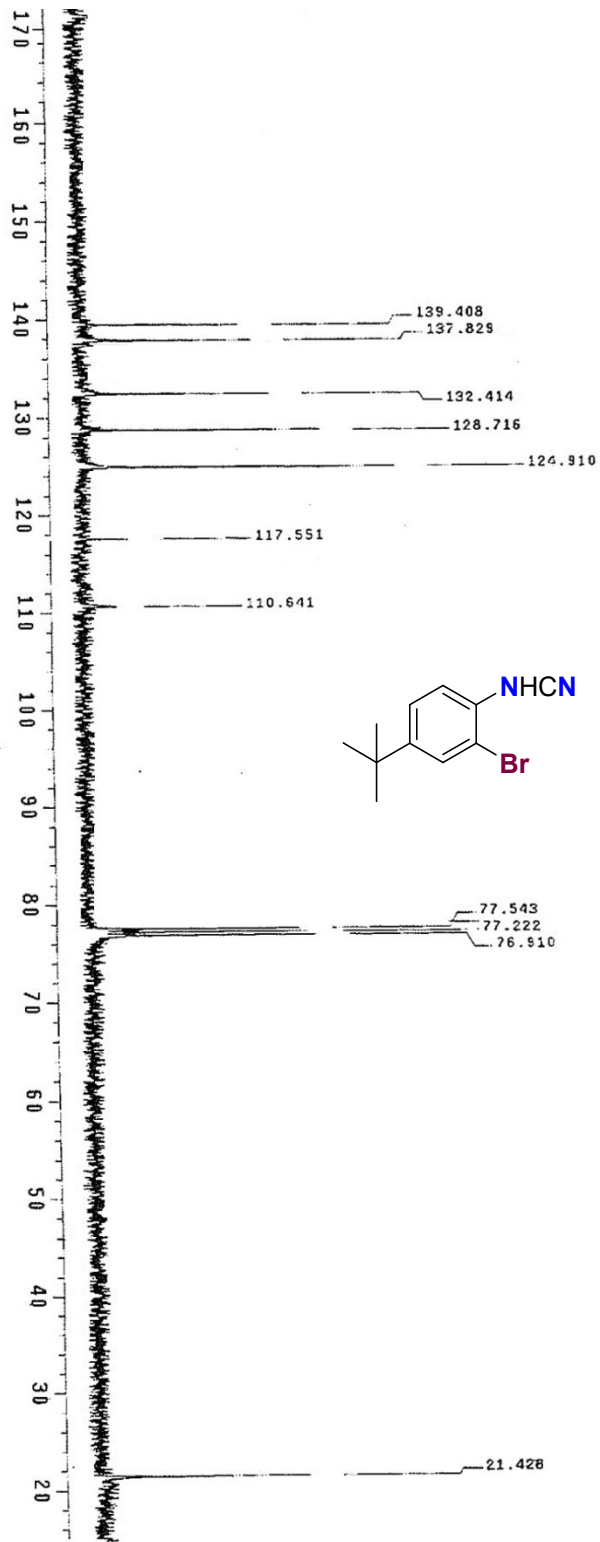

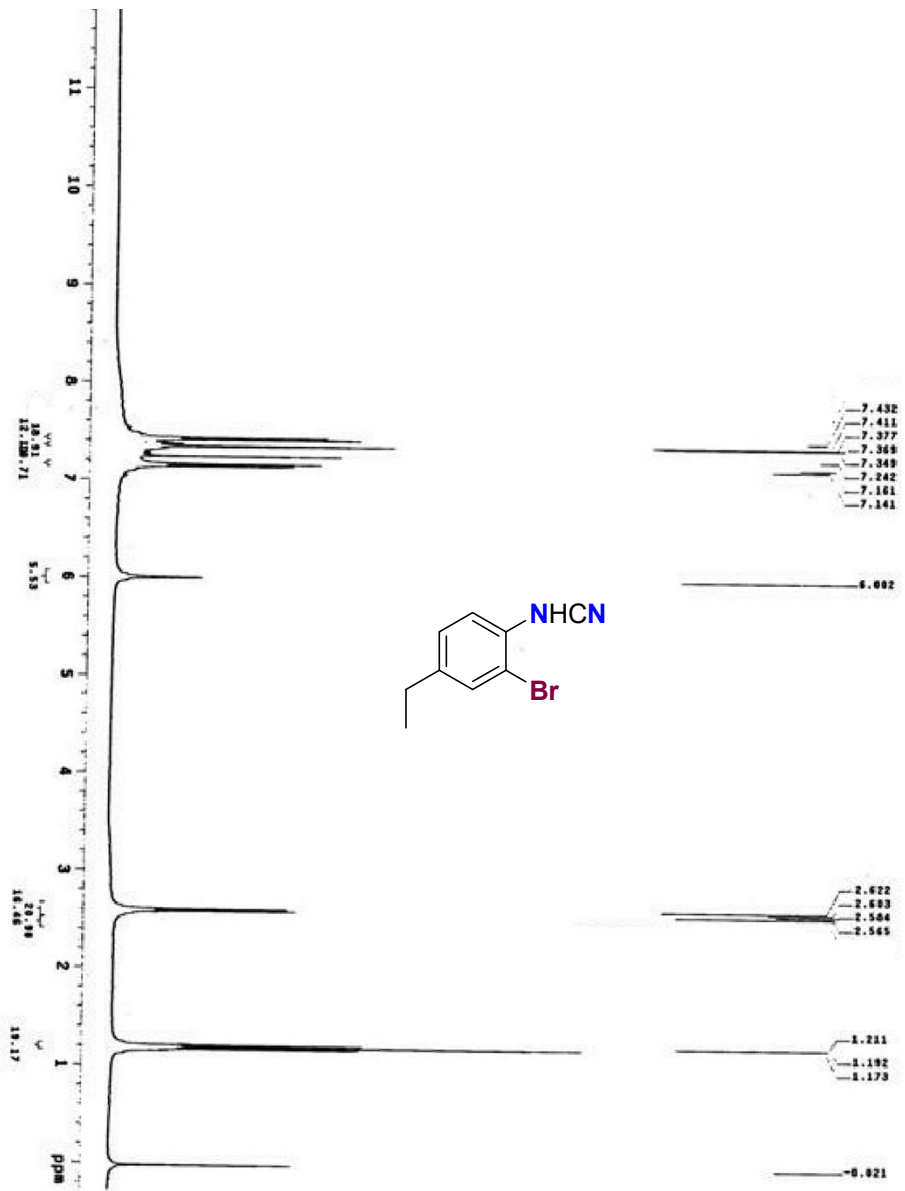

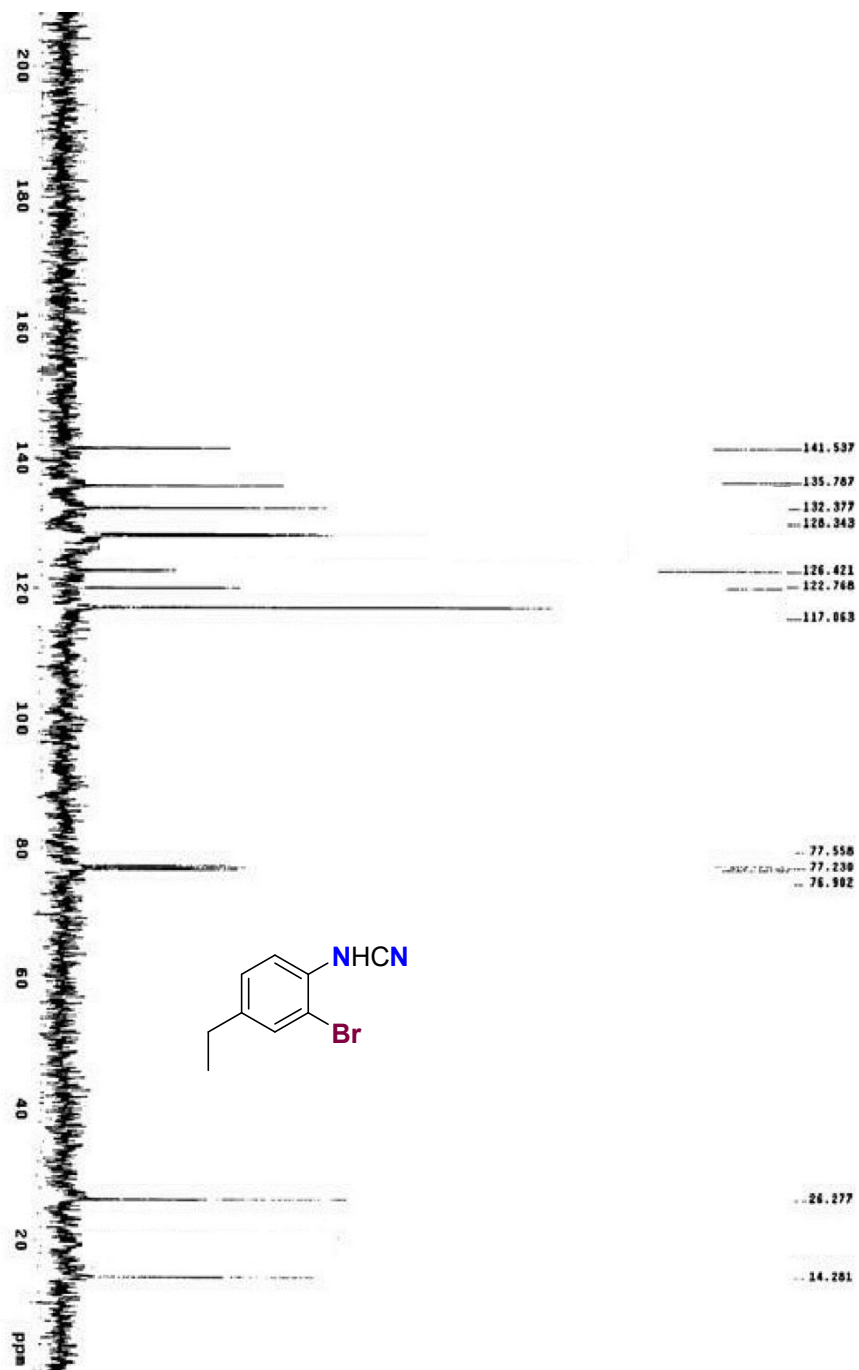

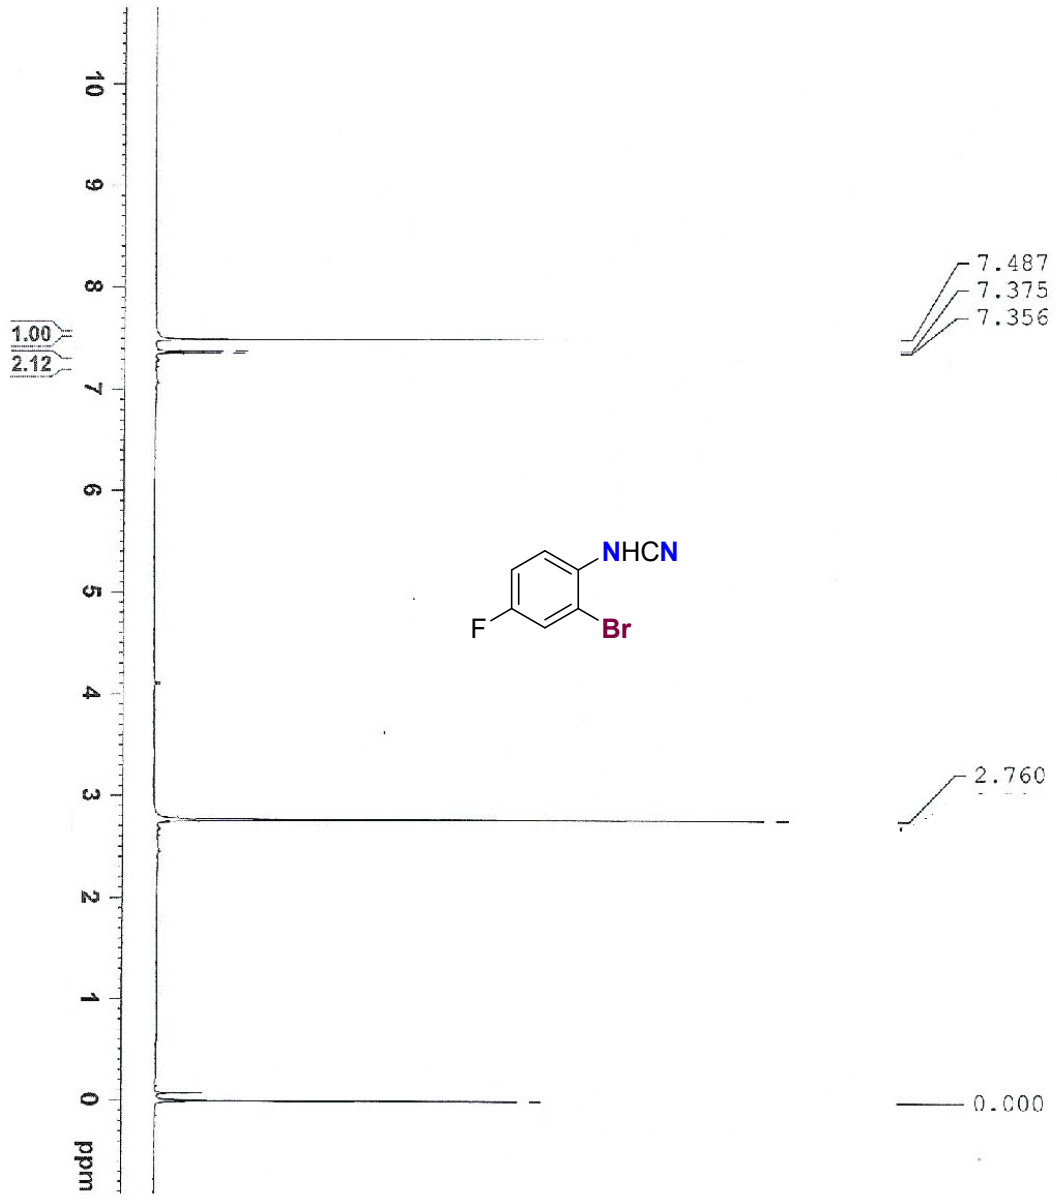

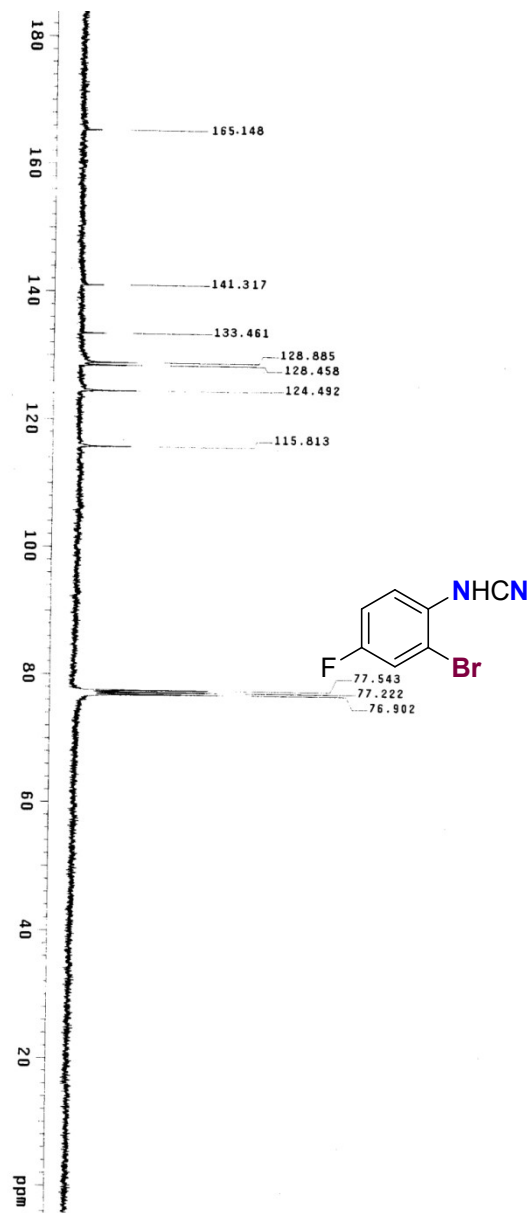

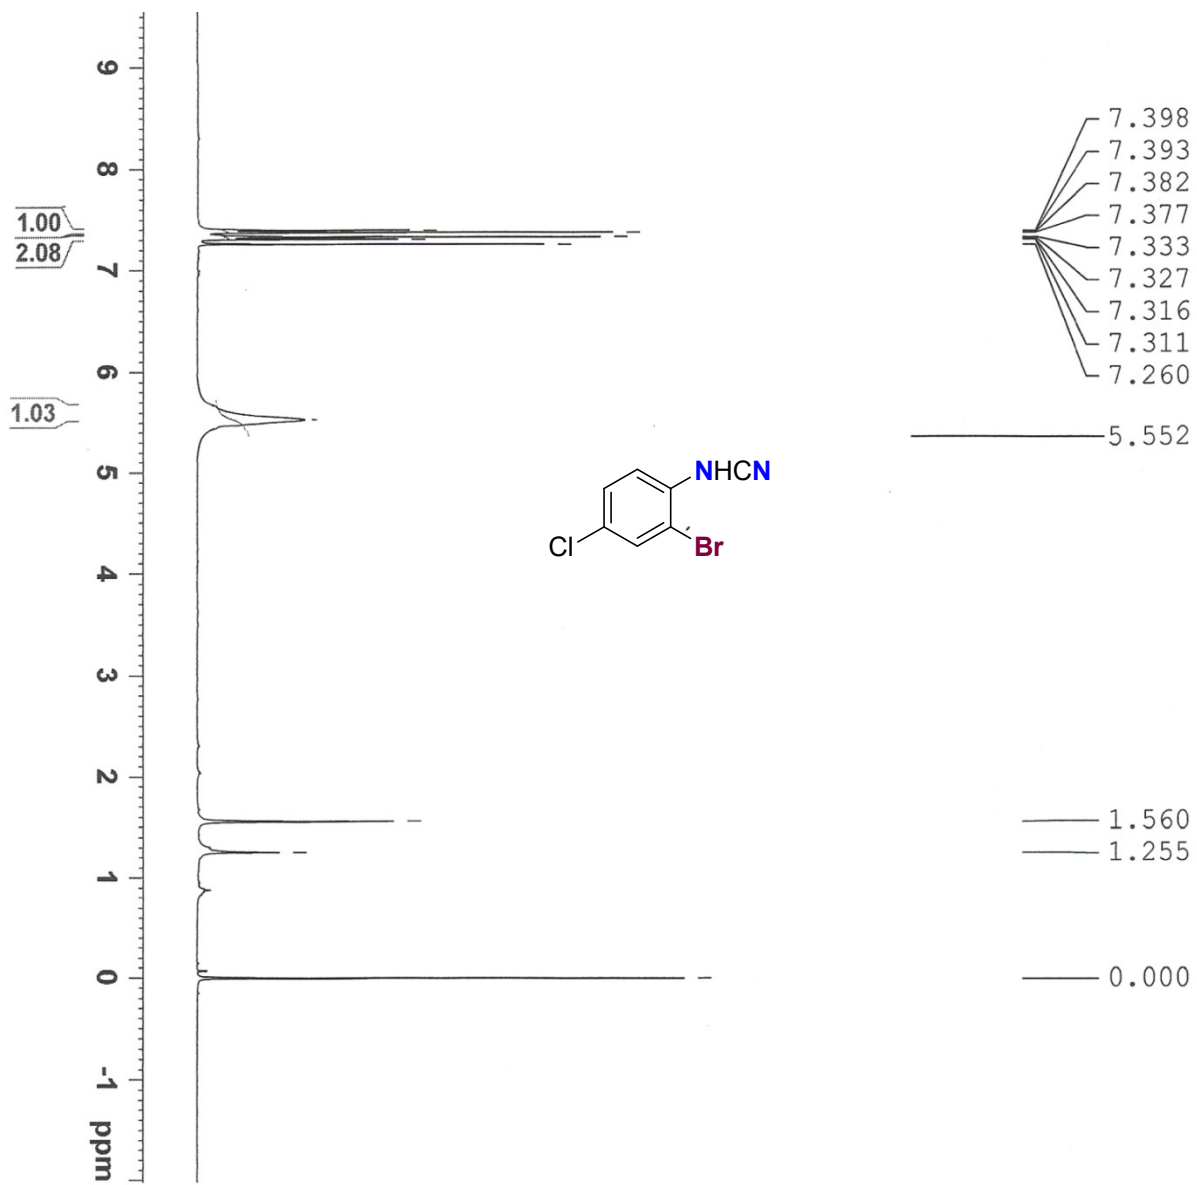



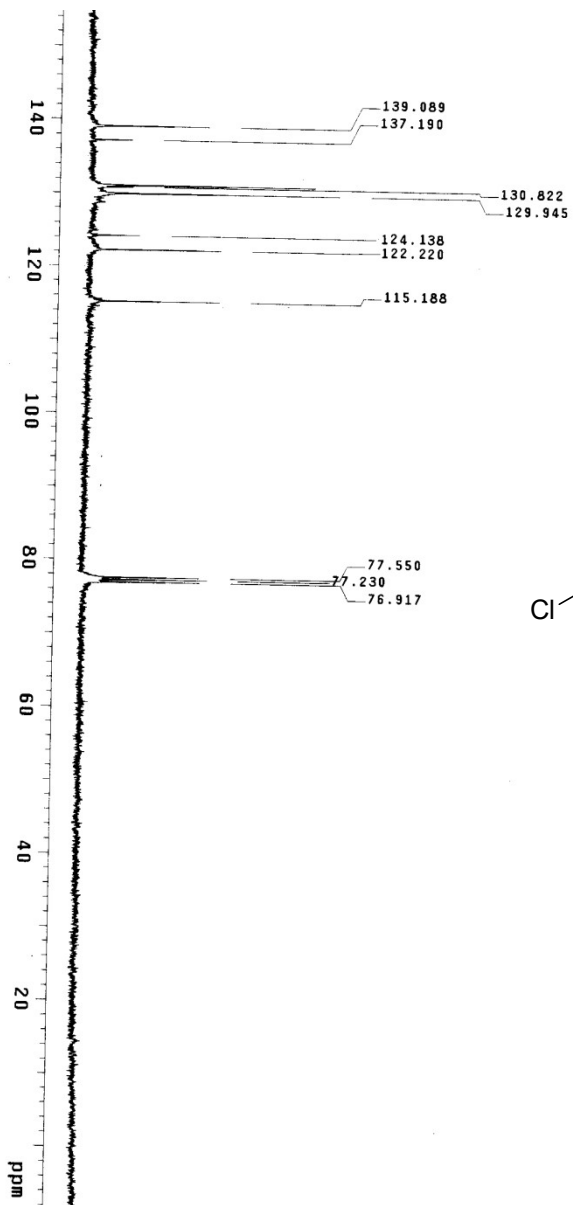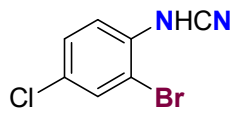

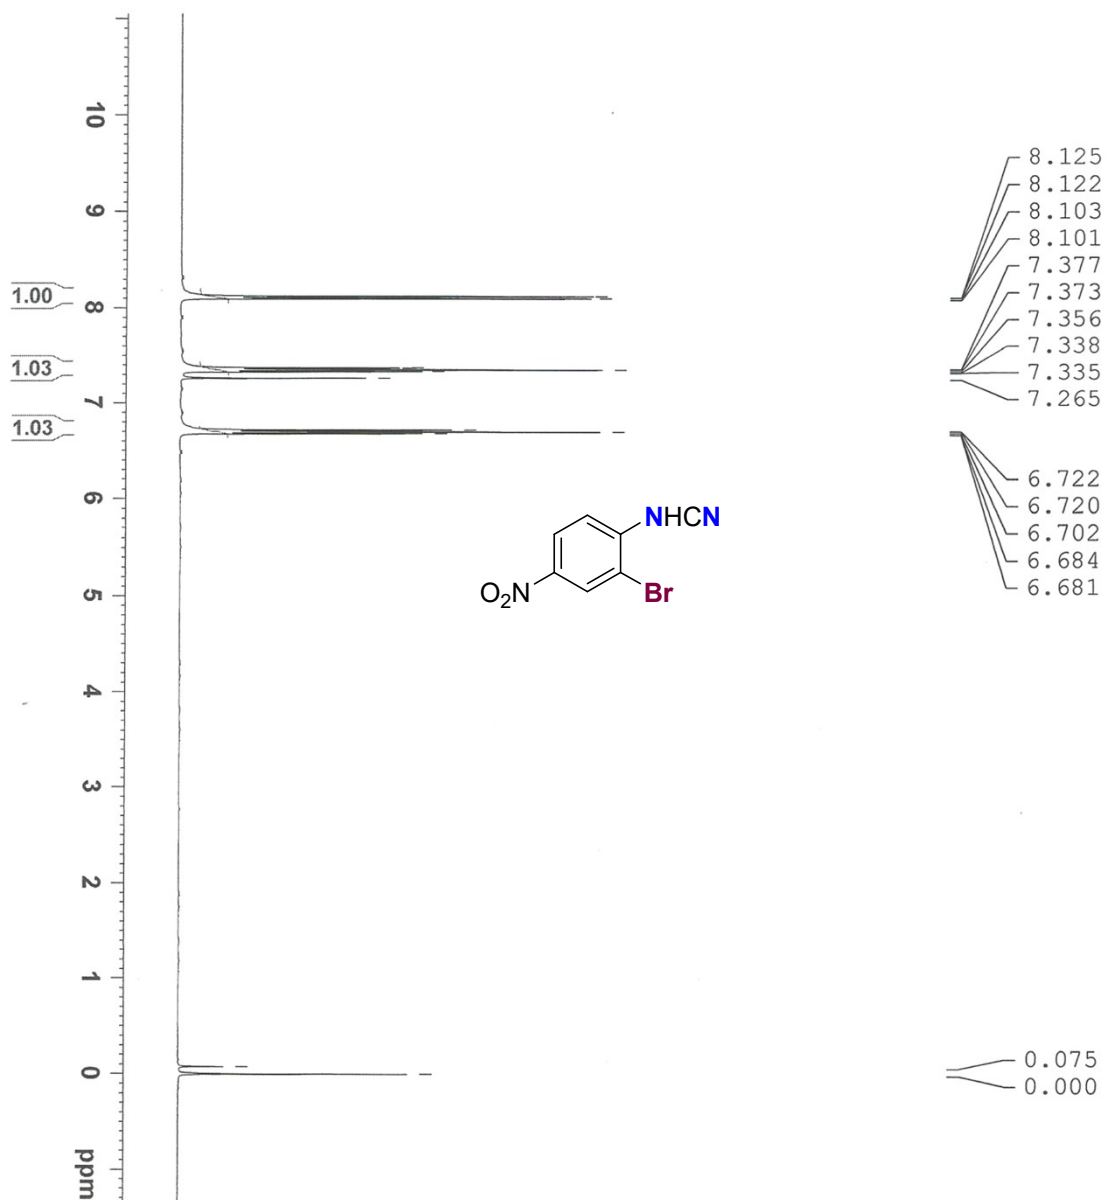

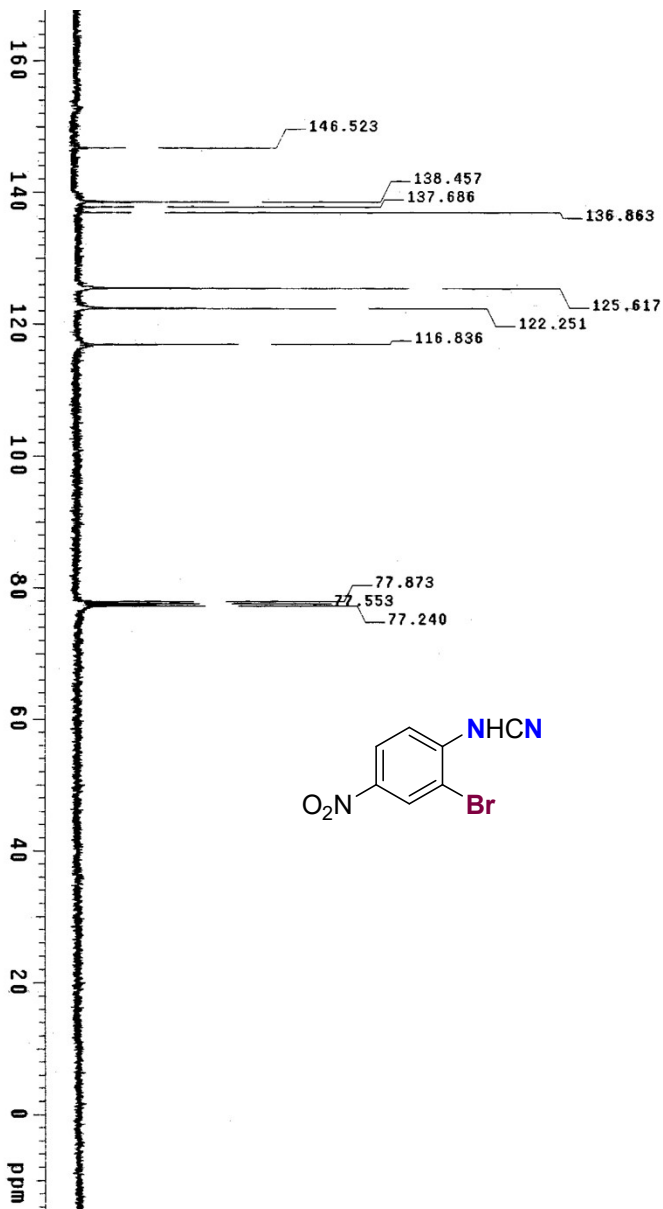

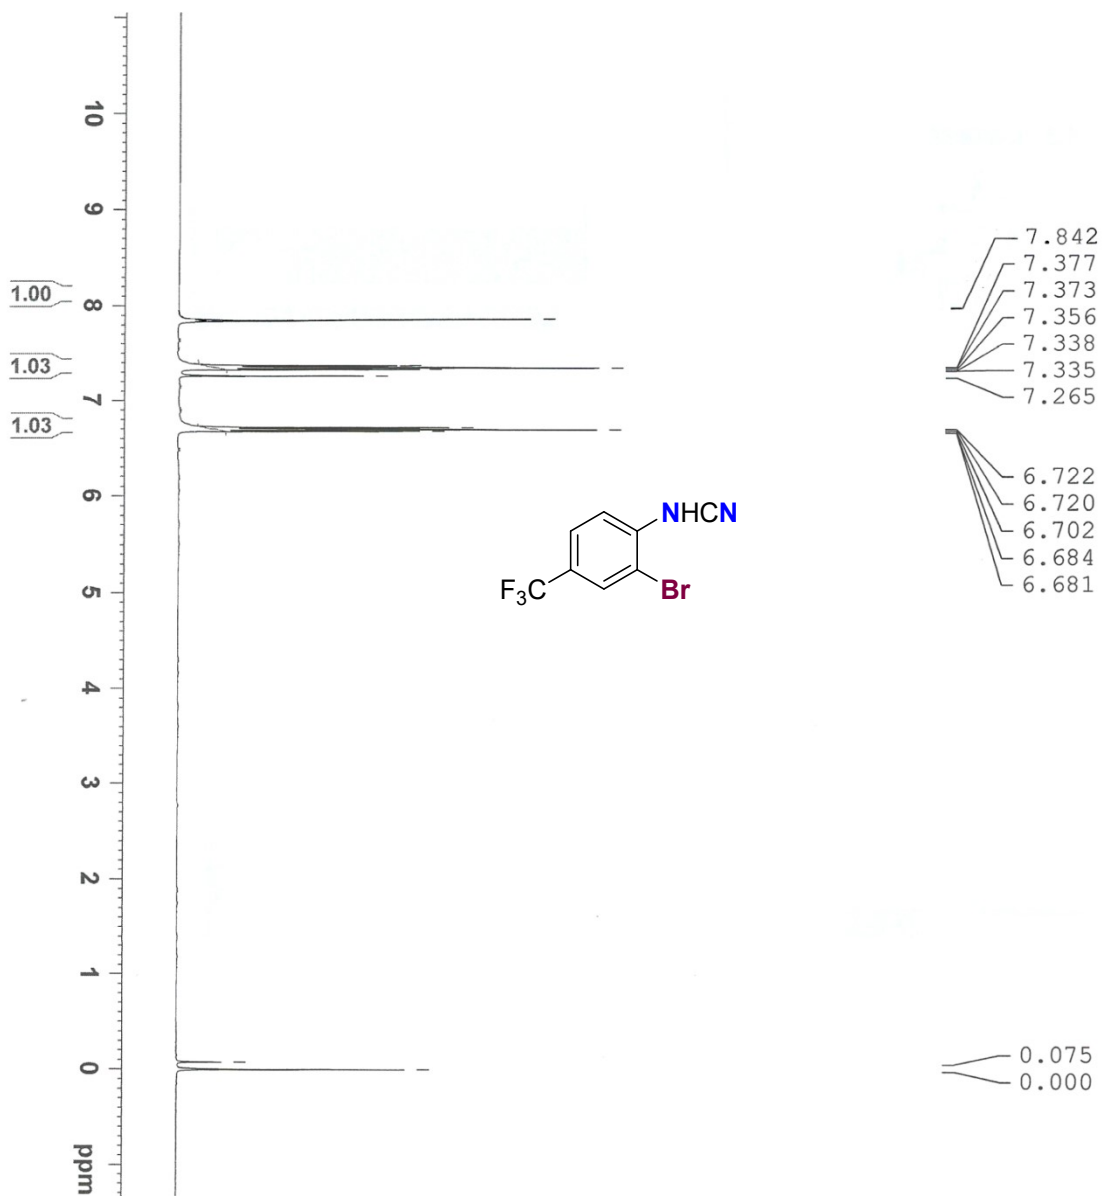

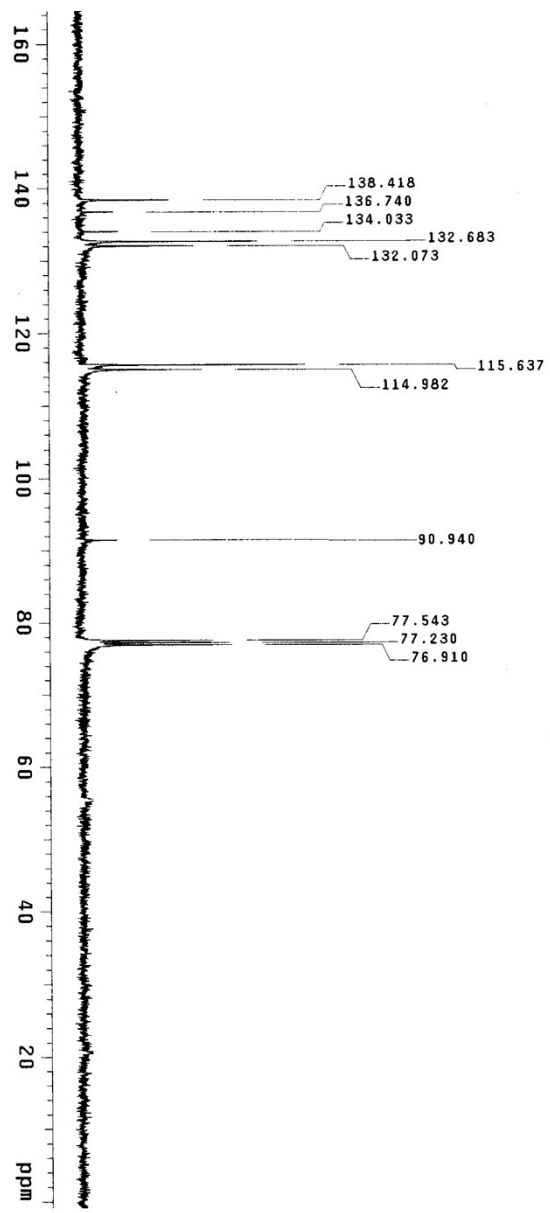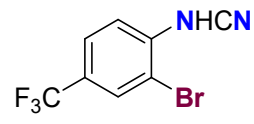

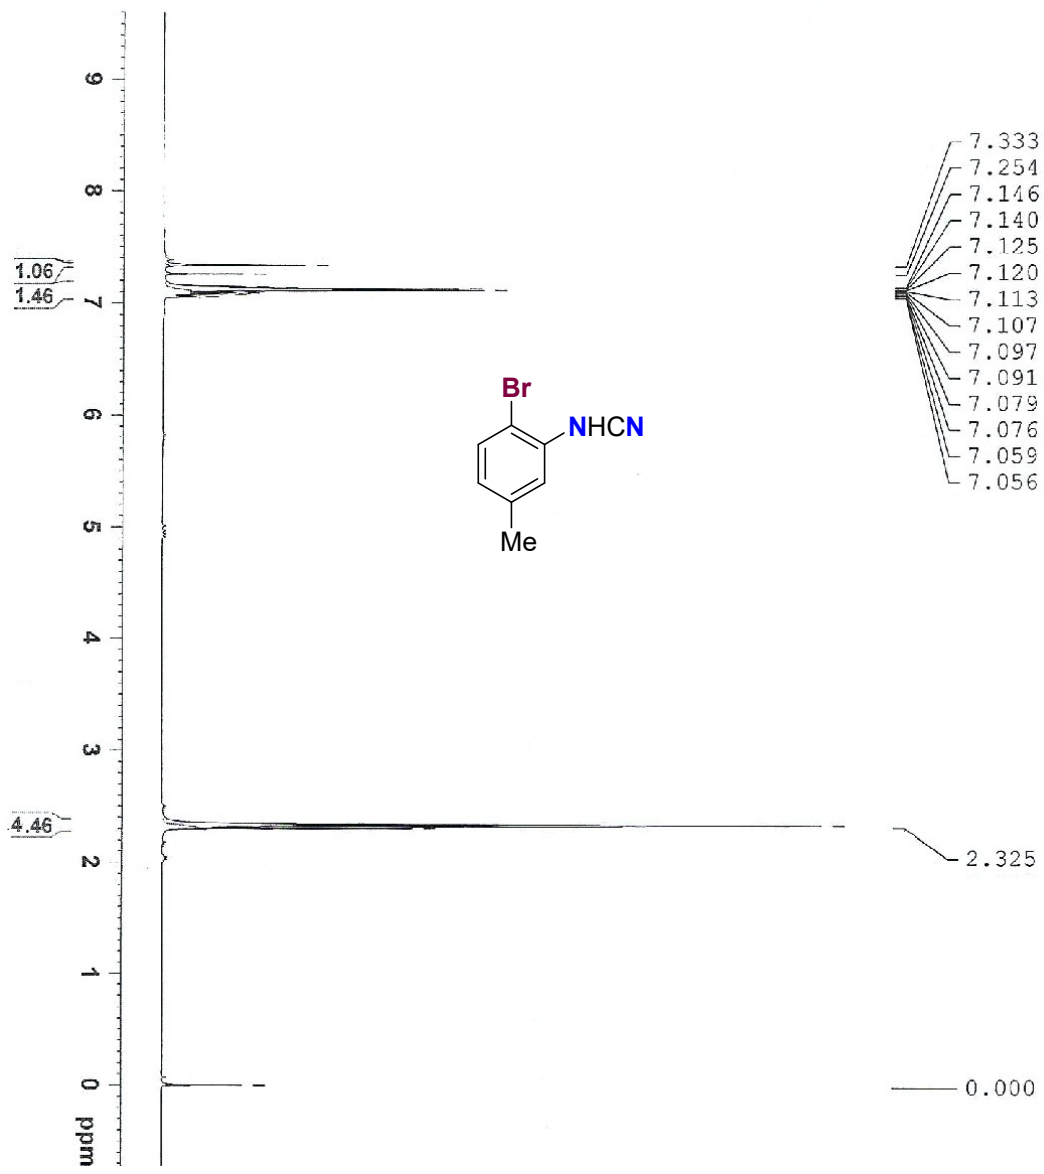

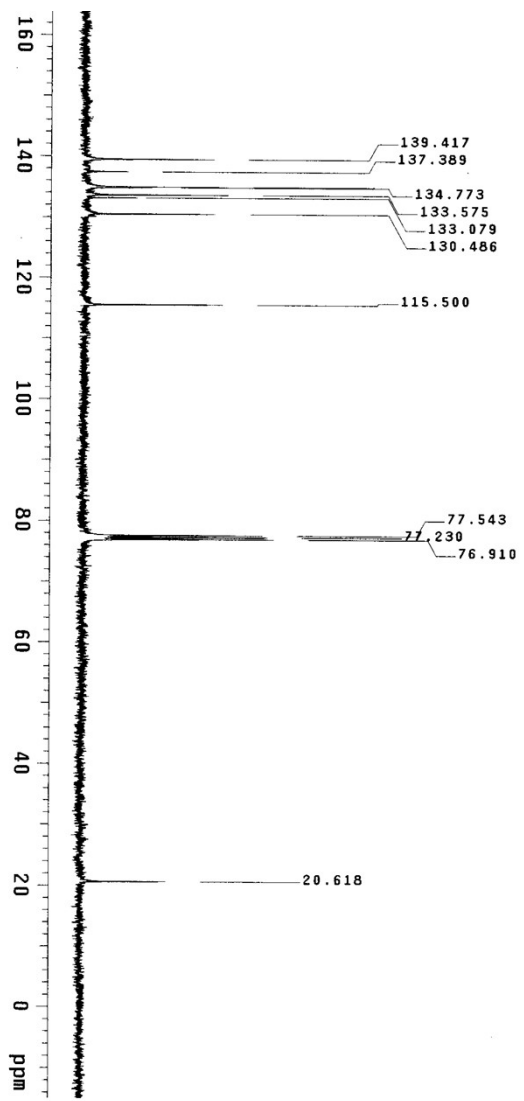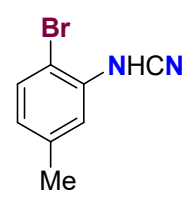

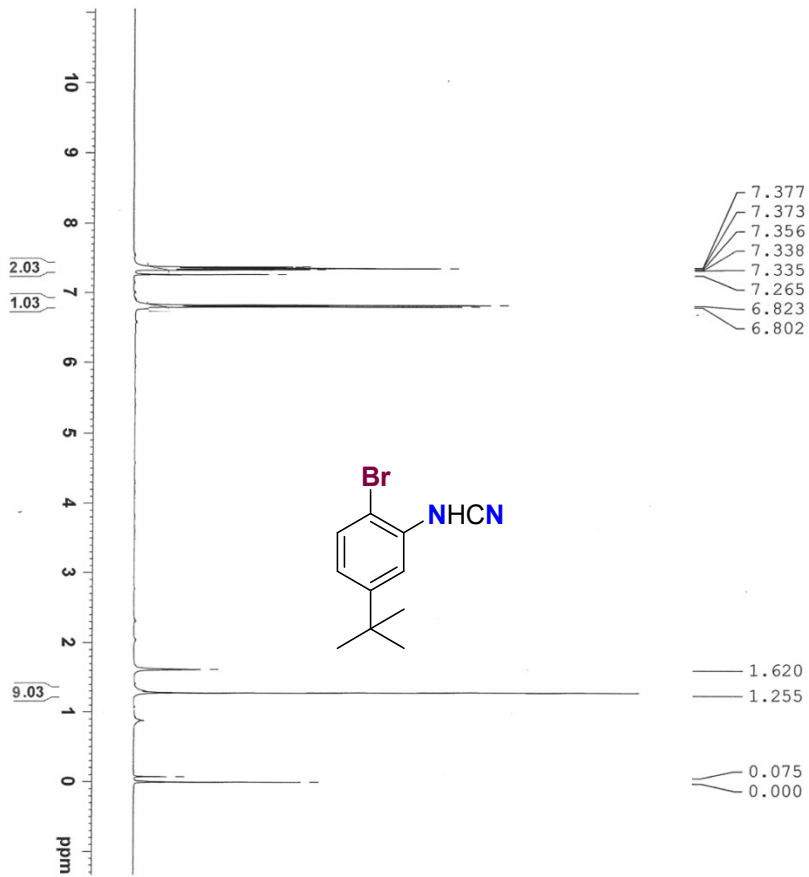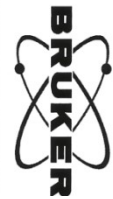

Current Data Parameters  
 NAME M-3-5  
 EXPRNO 1  
 F2 - Acquisition Parameters  
 Date\_ 20160530  
 Time\_ 15.11  
 INSTRUM spect  
 PROBHD 5 mm BBO BB-1H  
 PULPROG zg30  
 TD 65536  
 SOLVENT CDCl3  
 NS 16  
 DS 2  
 SWH 8250.825  
 FIDRES 0.125898  
 AQ 3.9715922  
 RG 60  
 Bg 287  
 DE 6.00  
 TE 300.0  
 D1 1.00000000  
 TDO 1  
 ===== CHANNEL f1 =====  
 NUC1 1H  
 P1 12.50  
 PL1 -0.50  
 SFO1 400.1324710  
 F2 - Processing parameters  
 SI 32768  
 SF 400.1300082  
 KW 0  
 SSB 0  
 LB 0.30  
 GB 0  
 PC 1.00



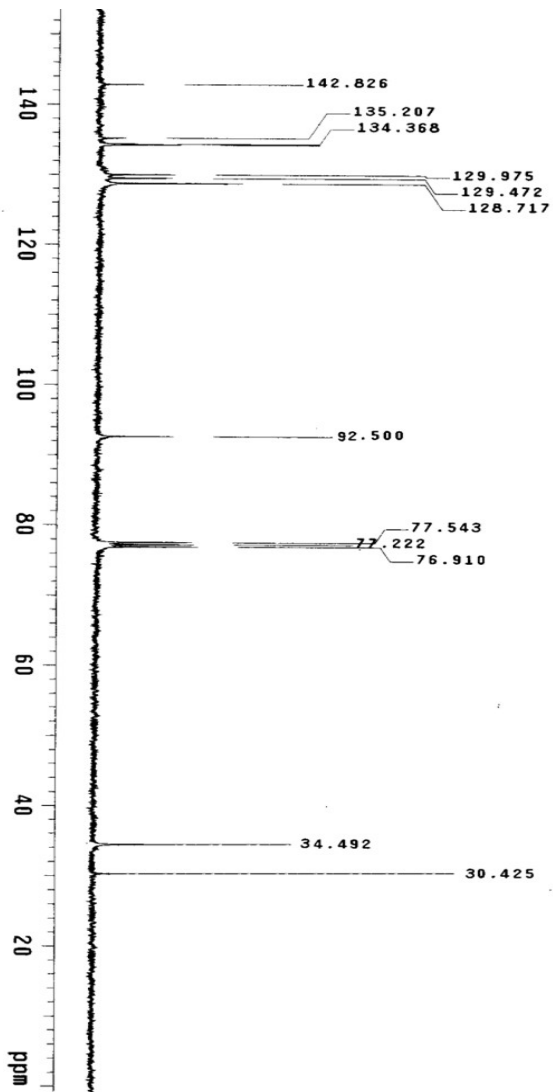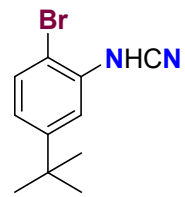

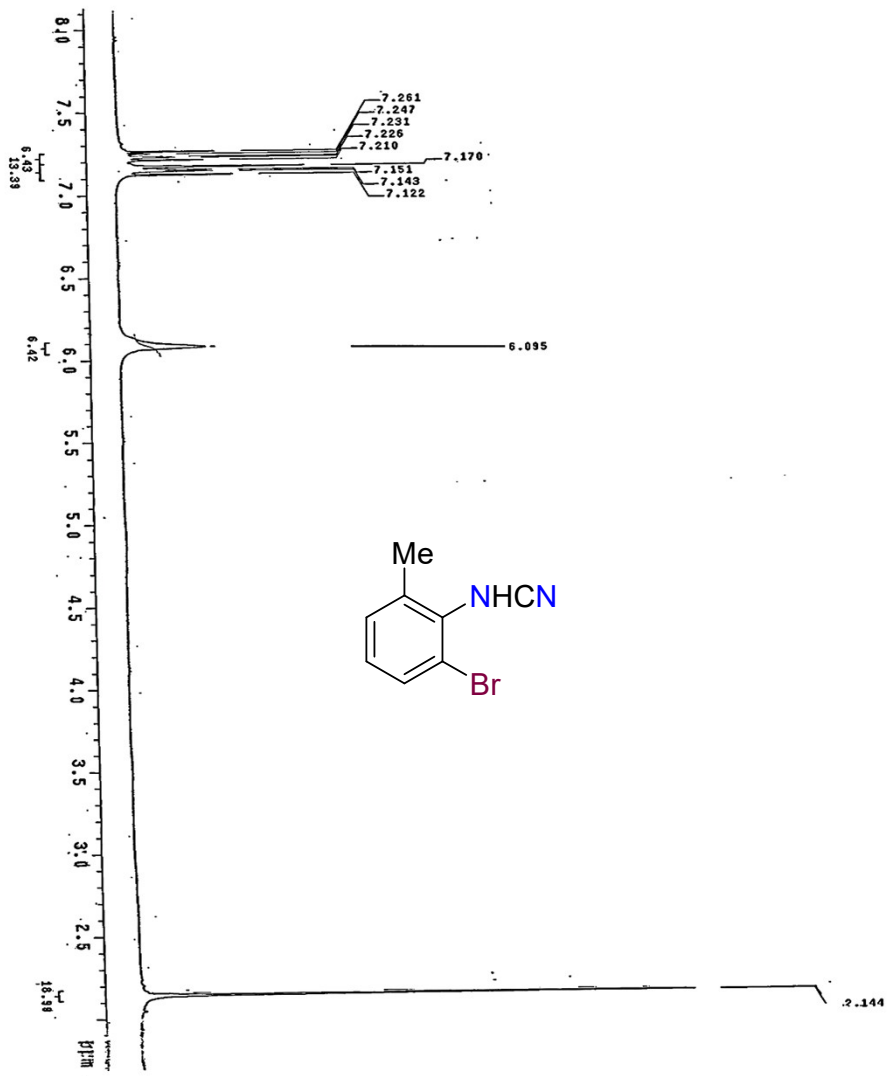

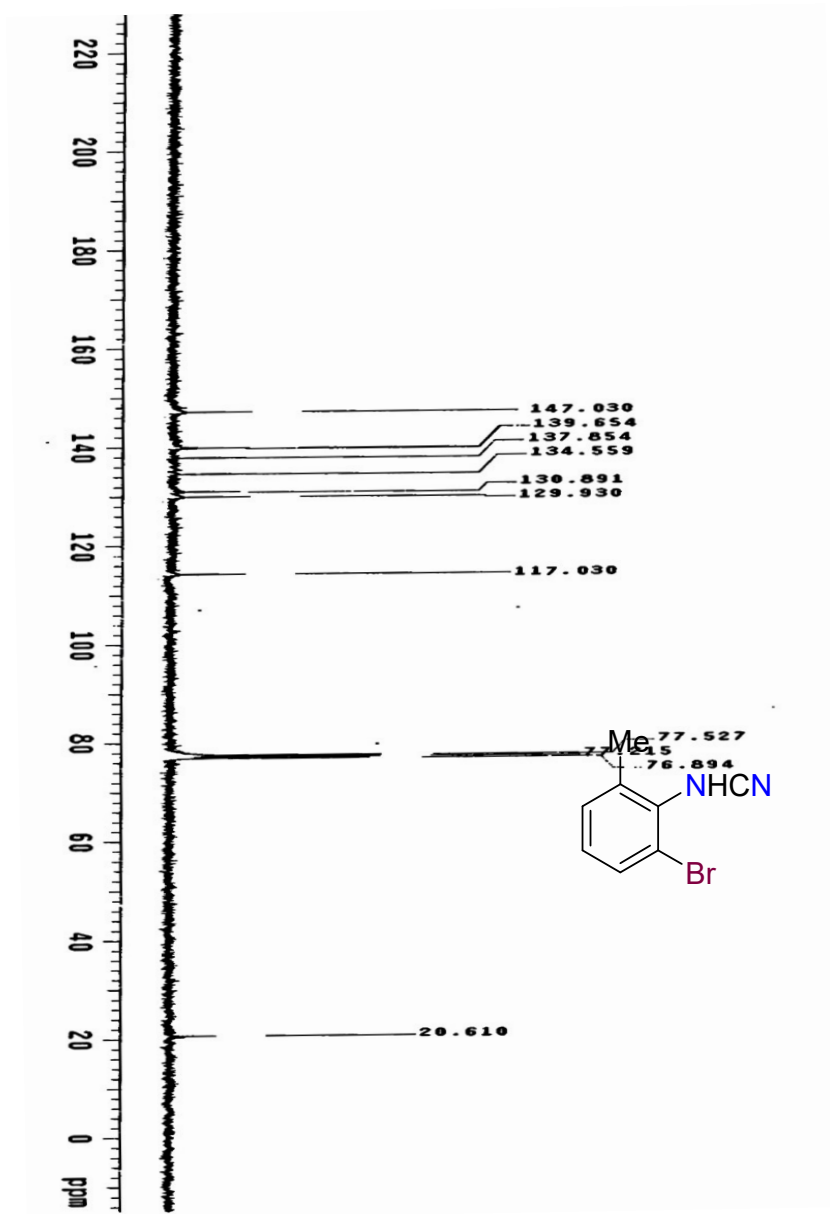

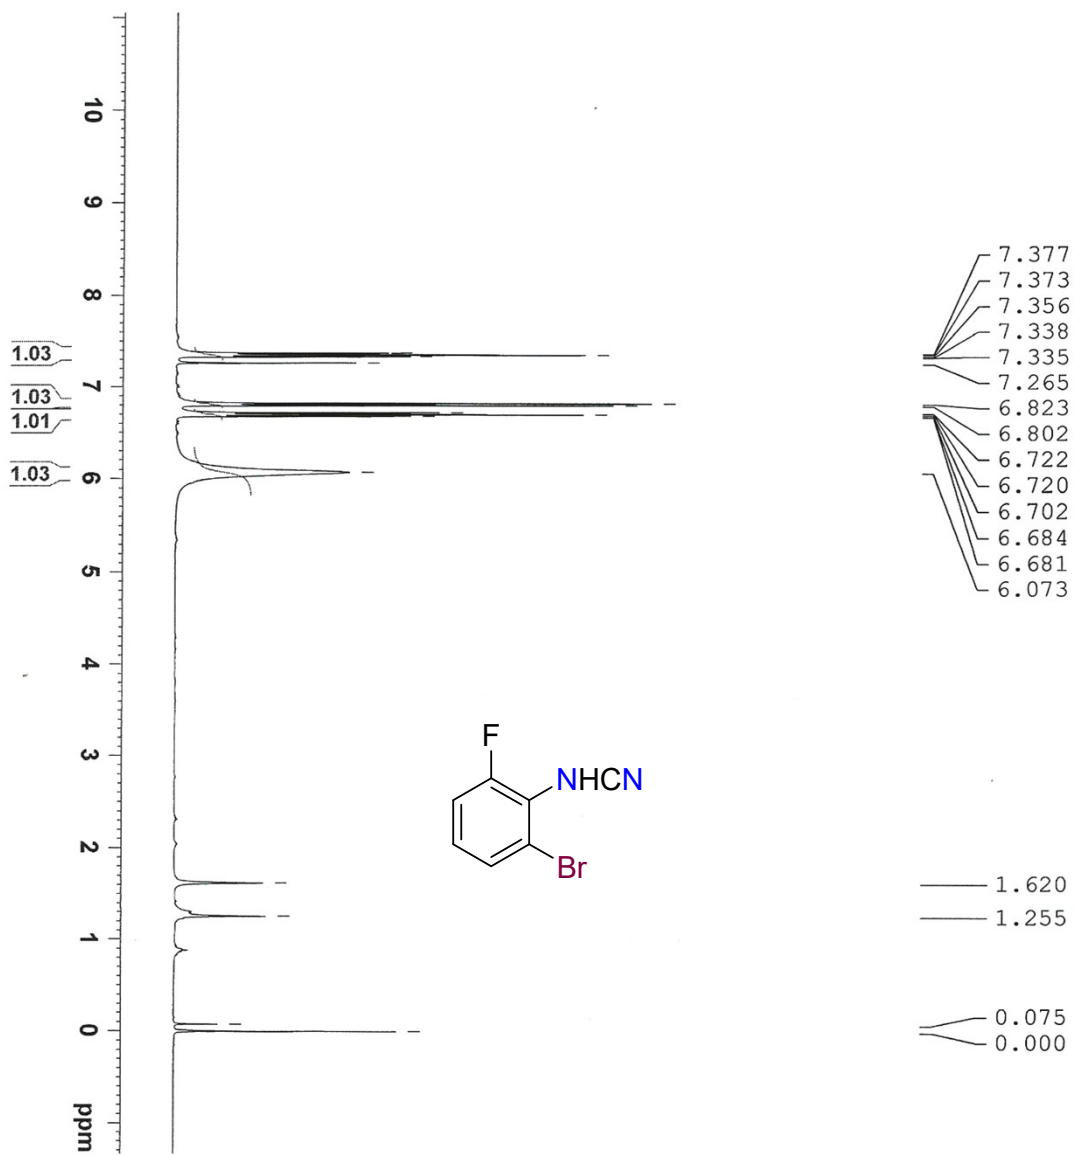

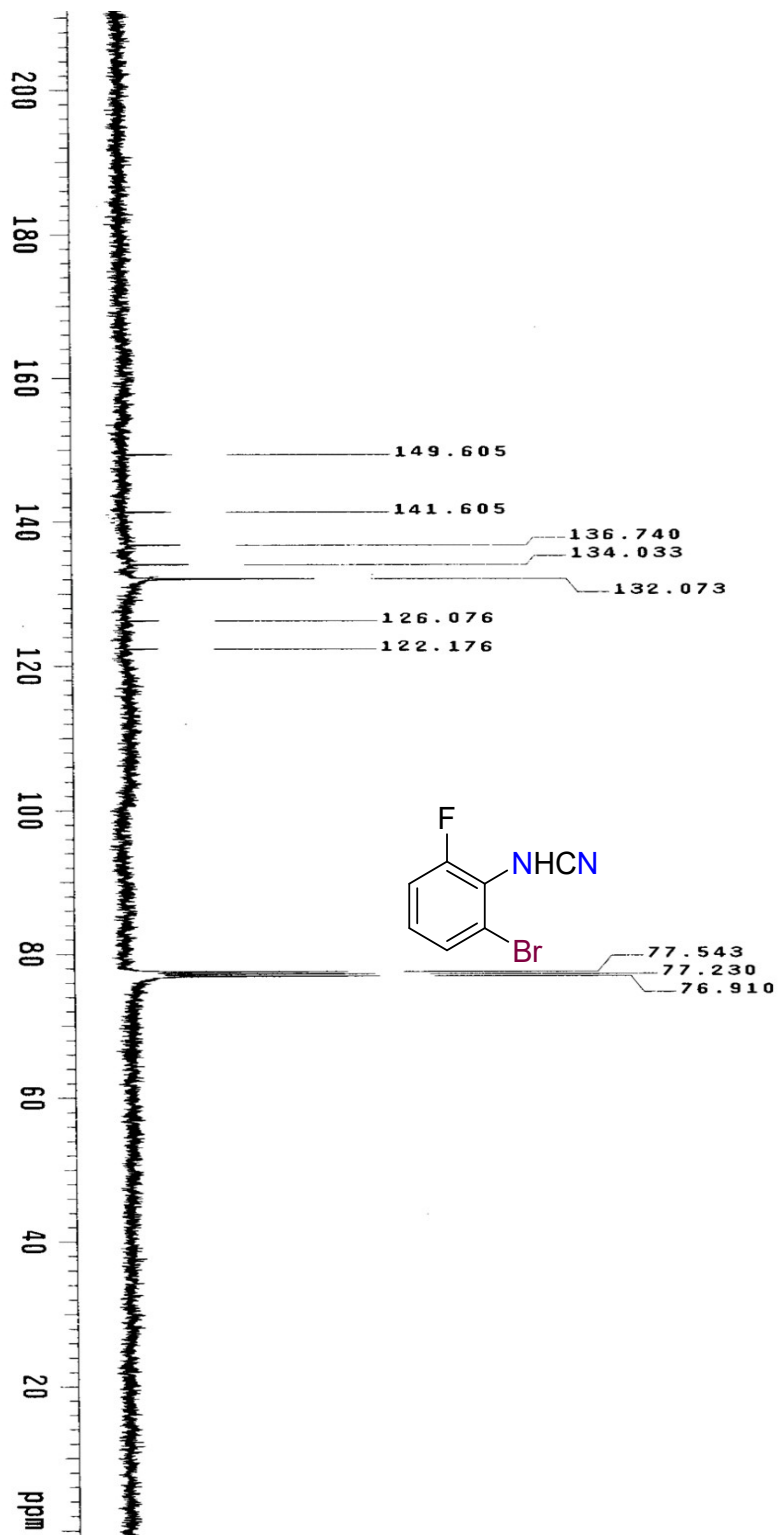

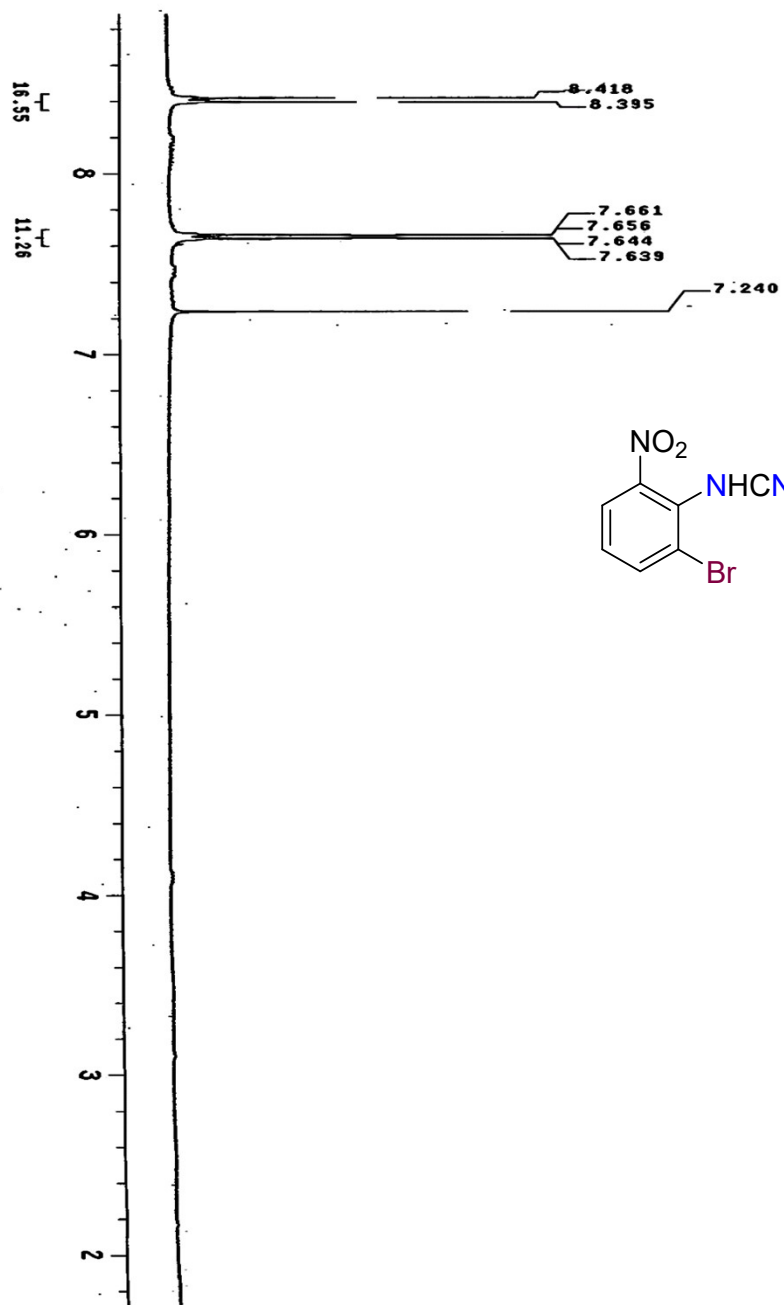

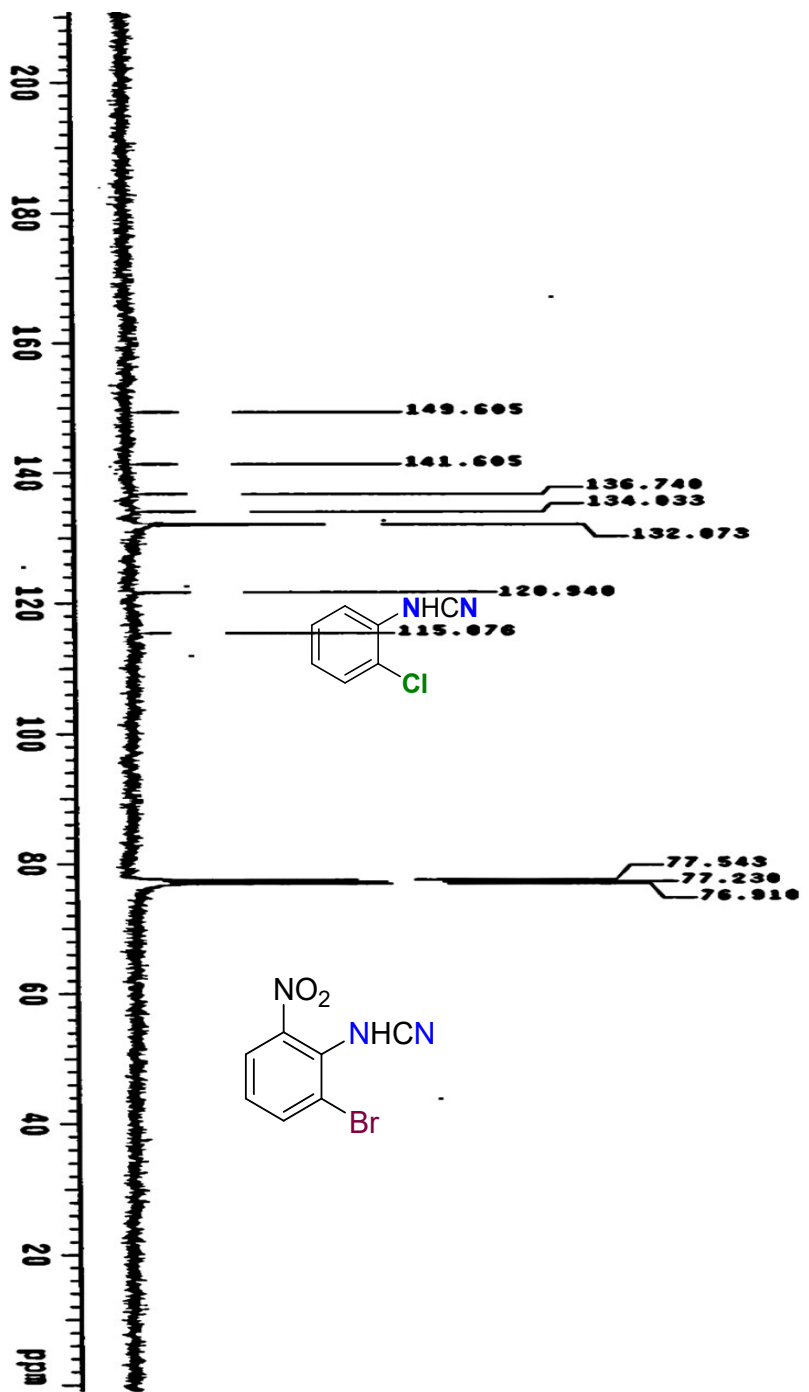

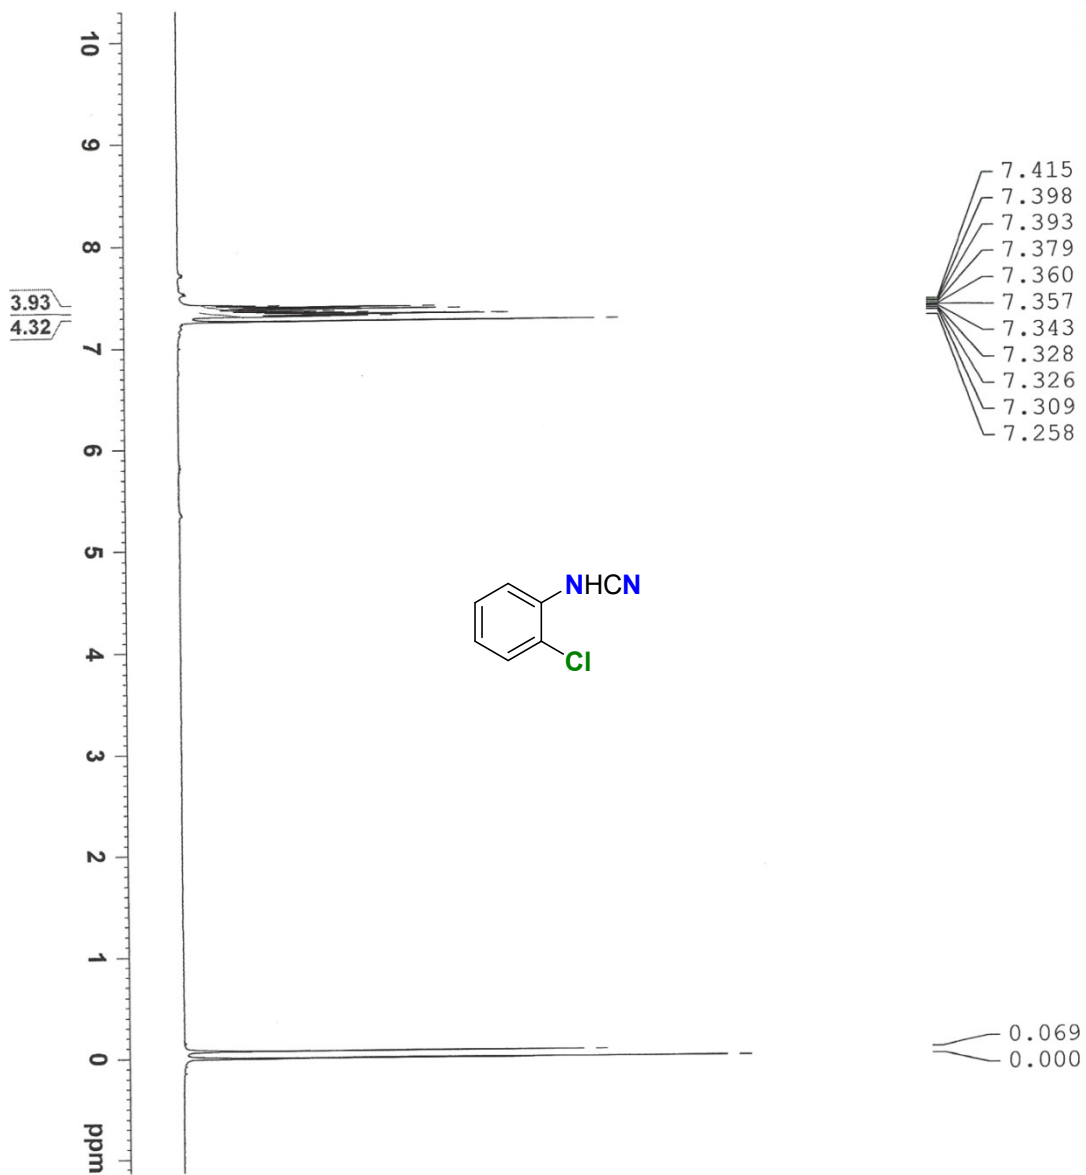



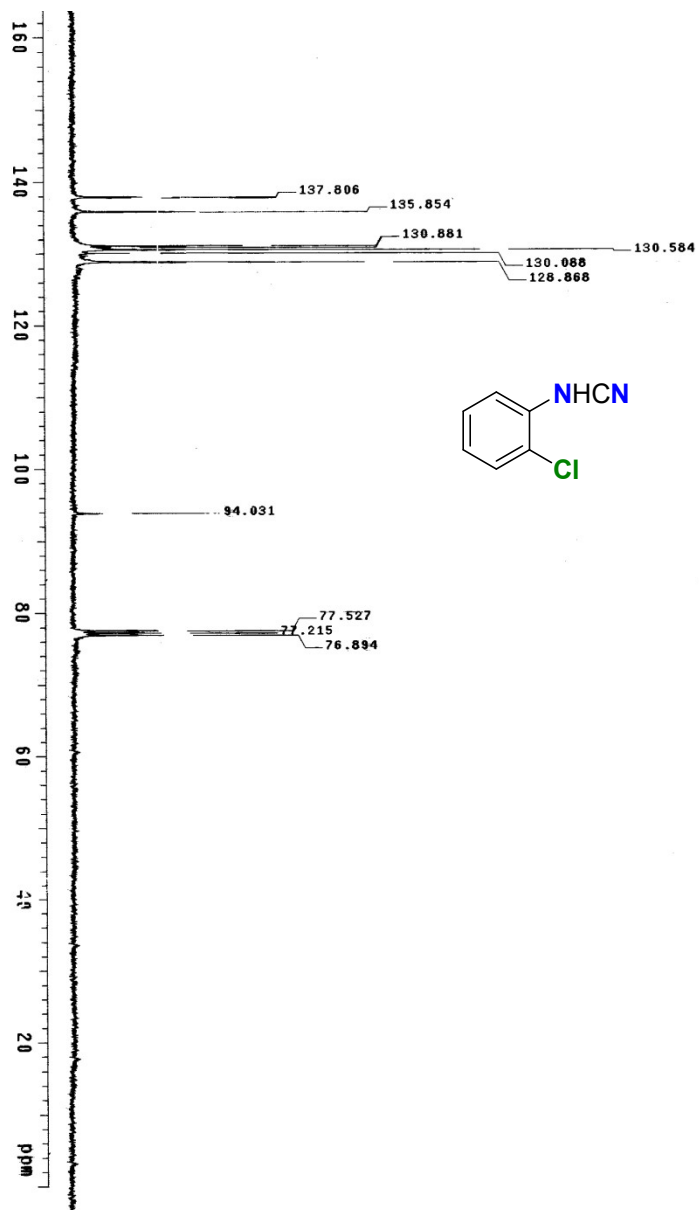

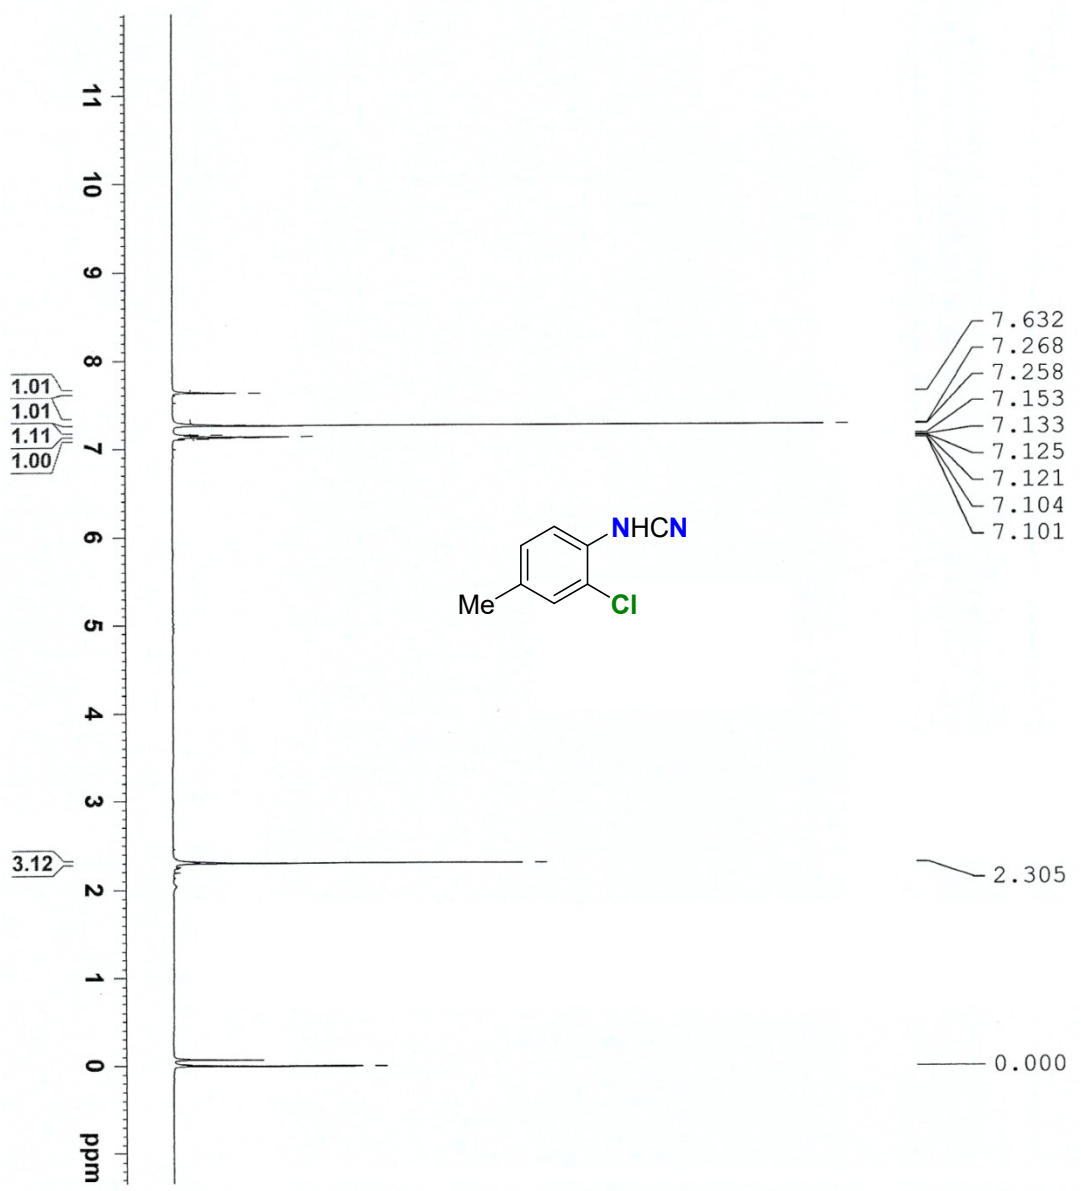

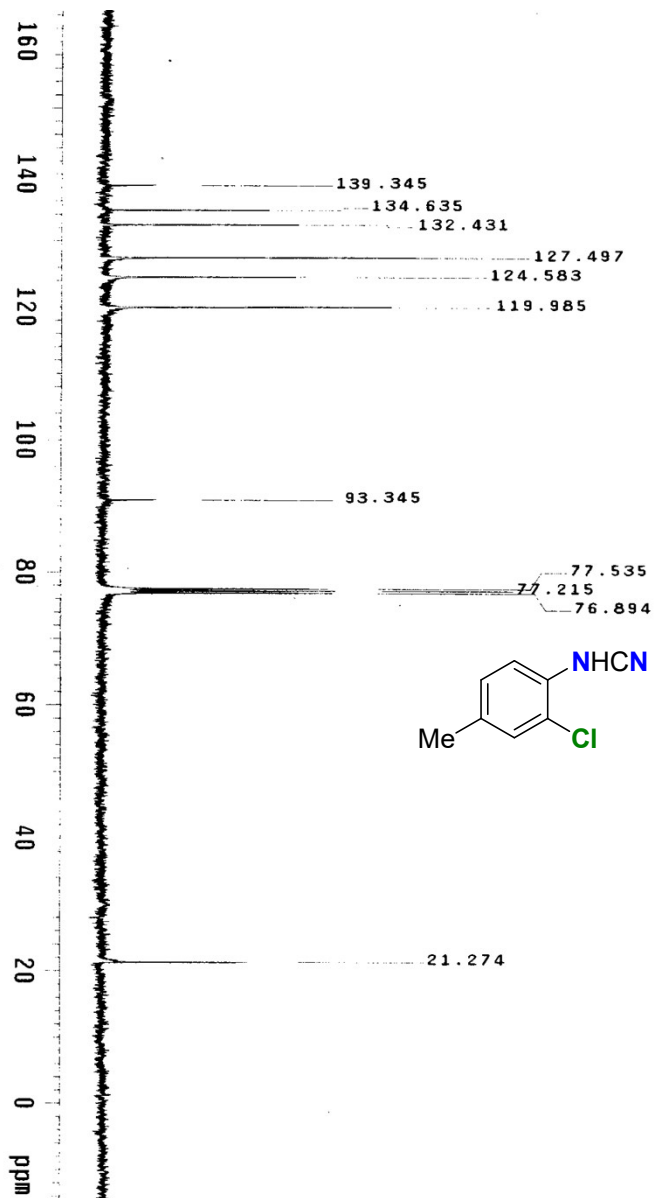

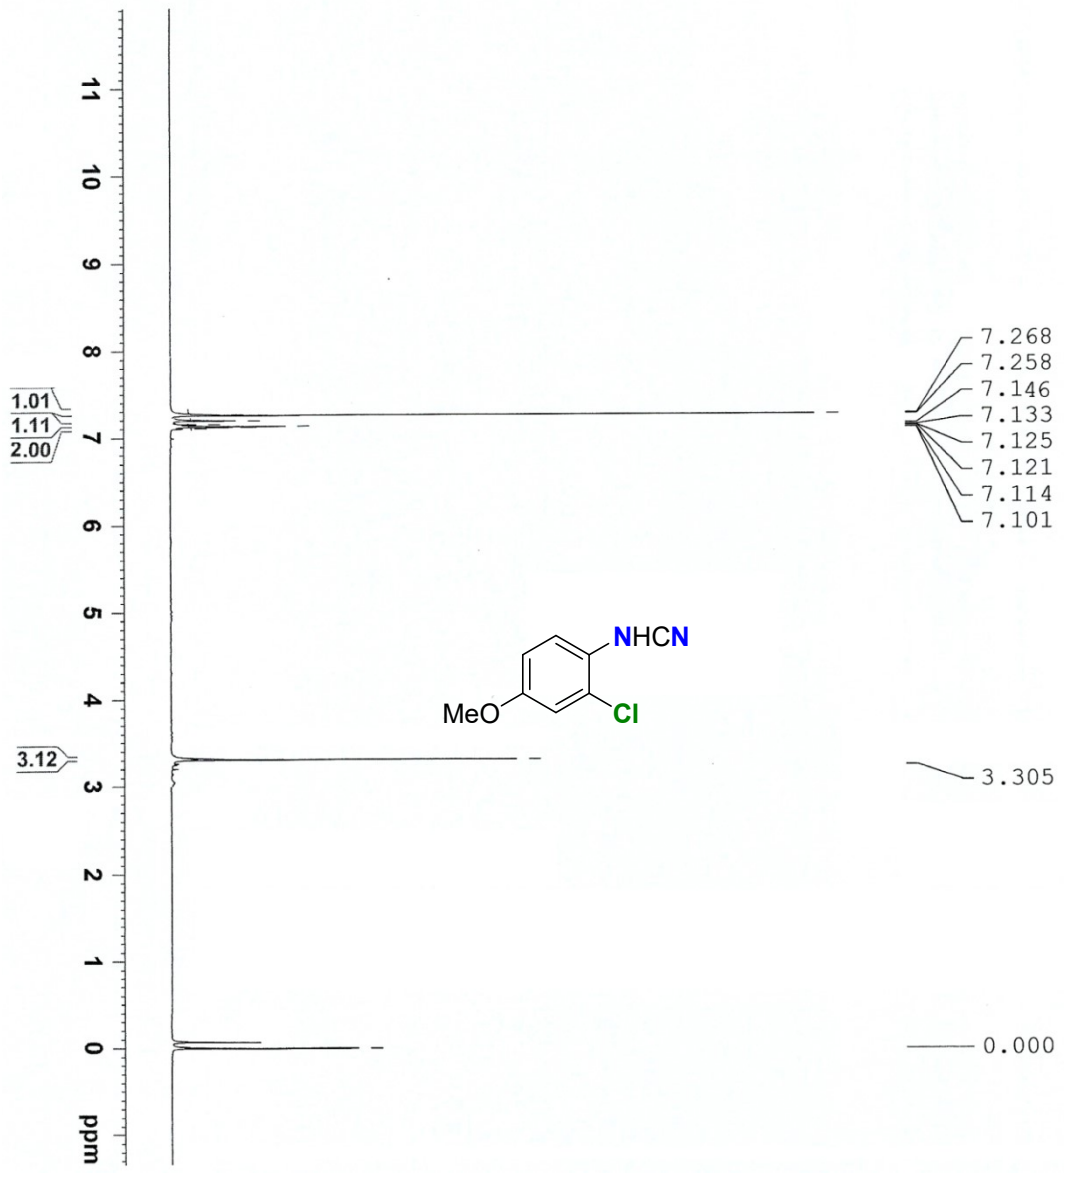

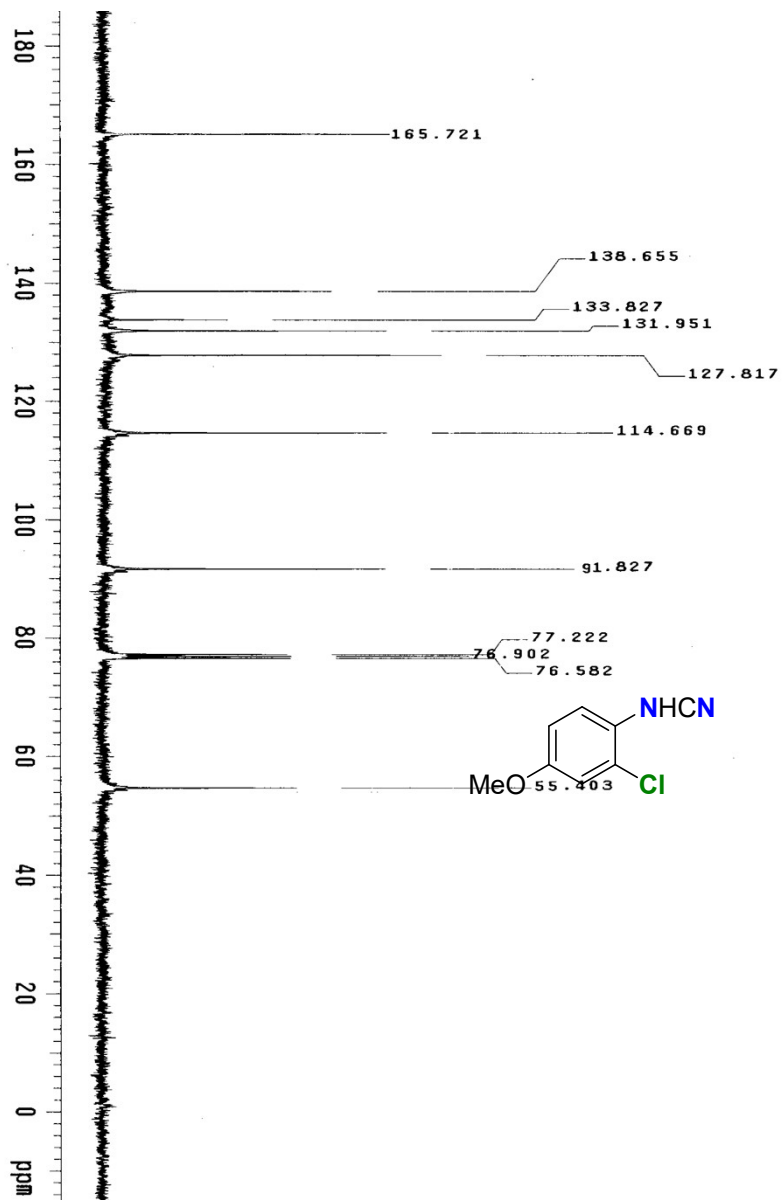

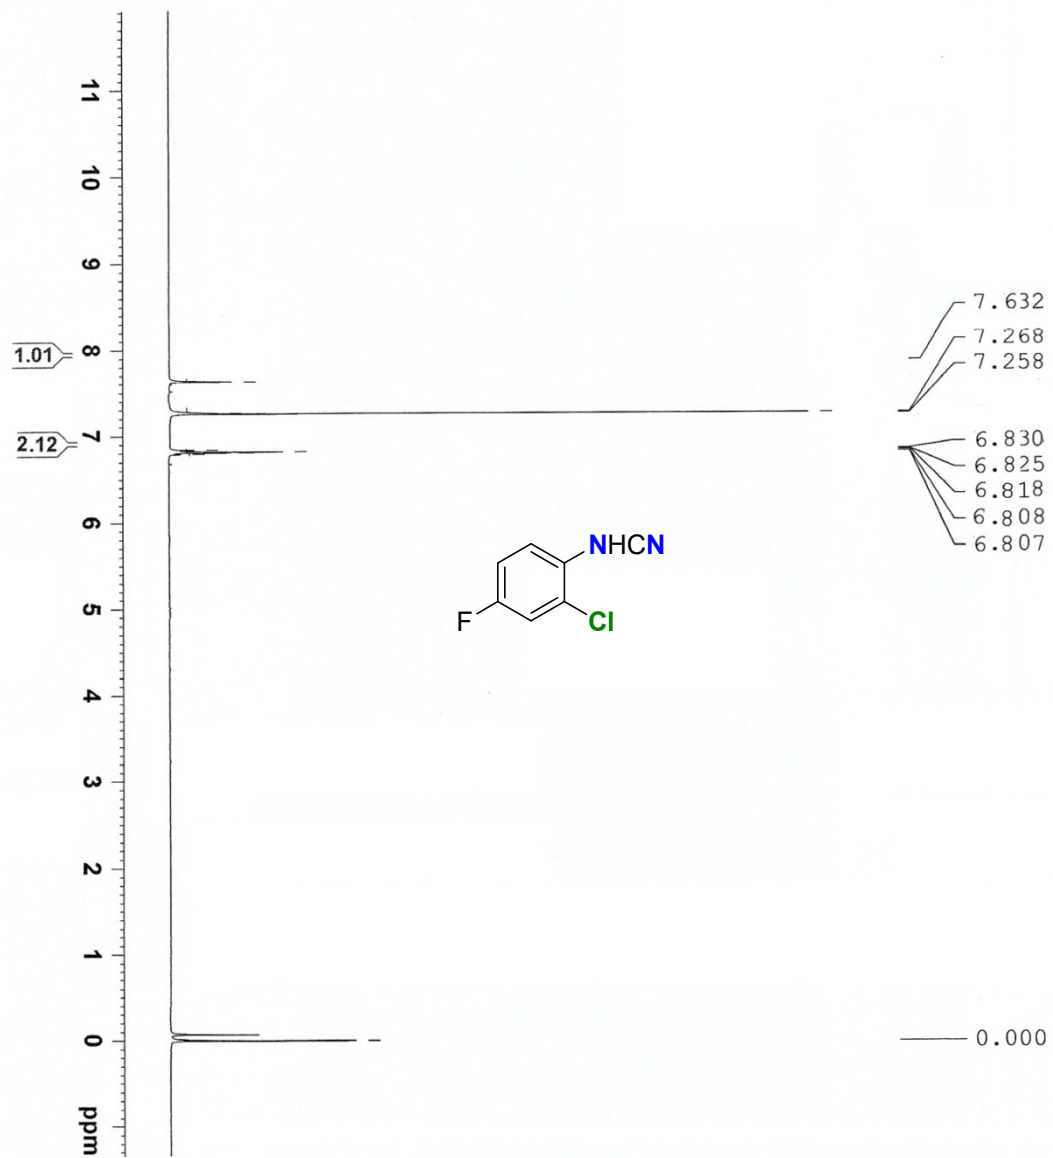

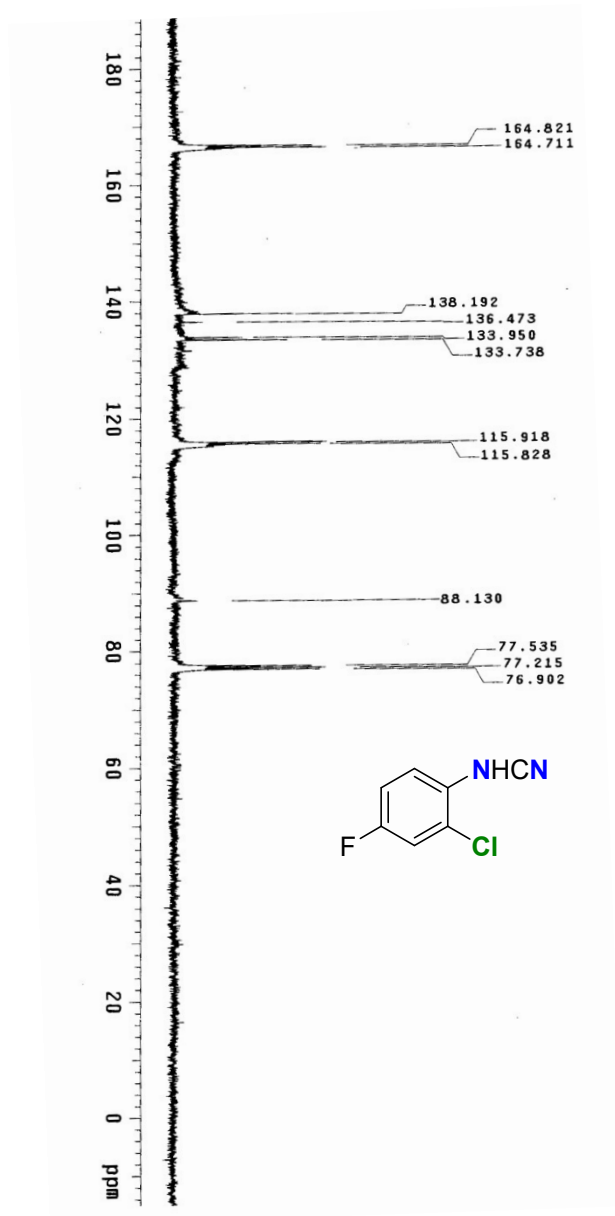

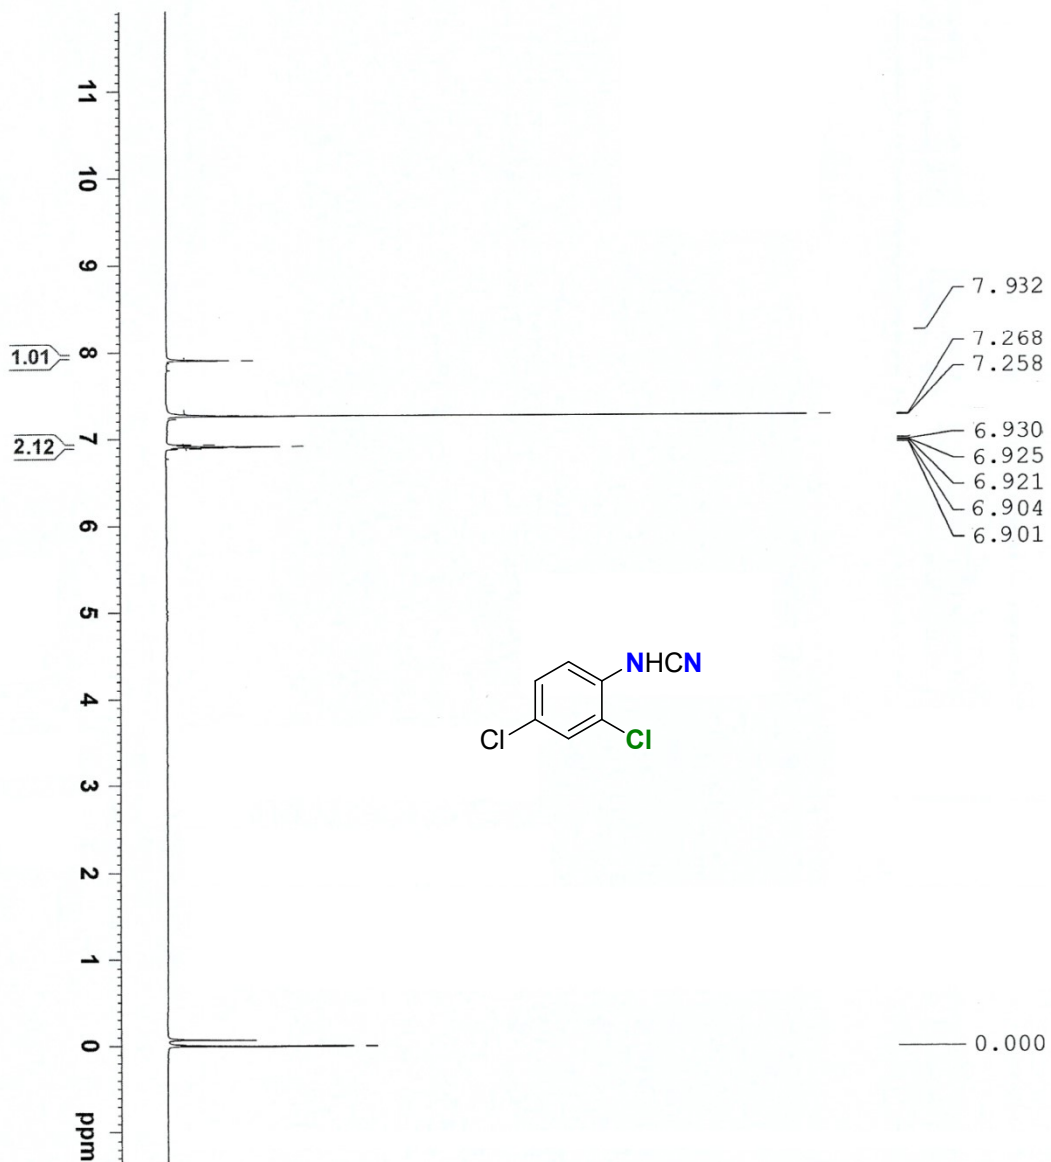



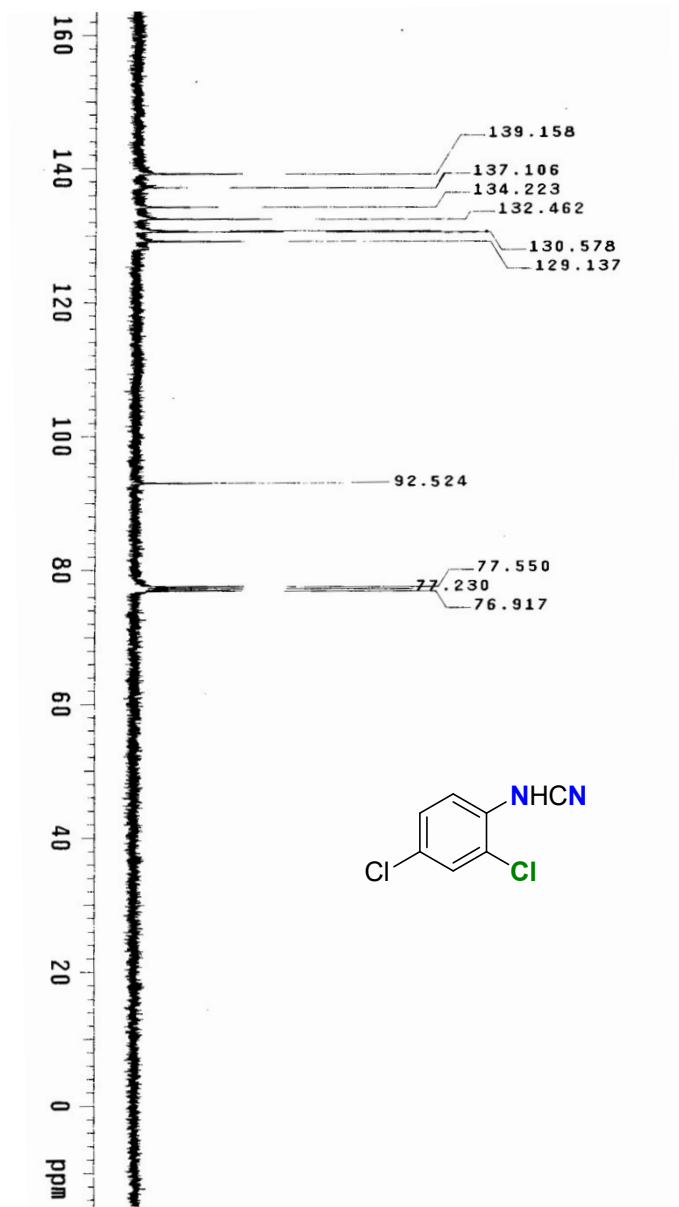

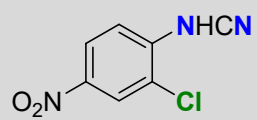

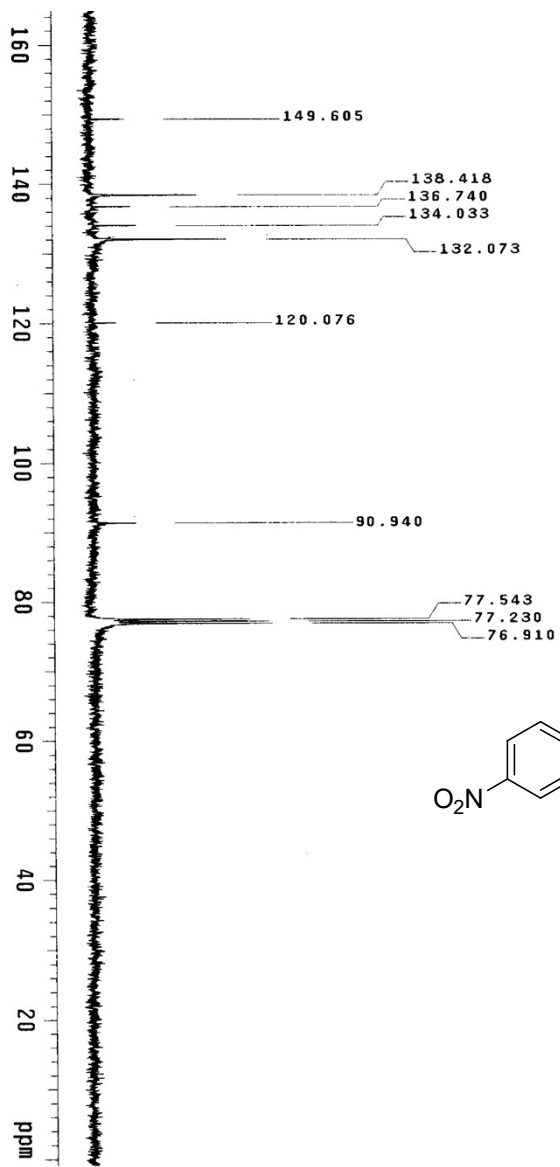

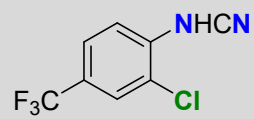

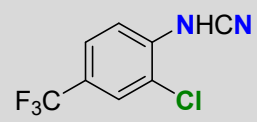

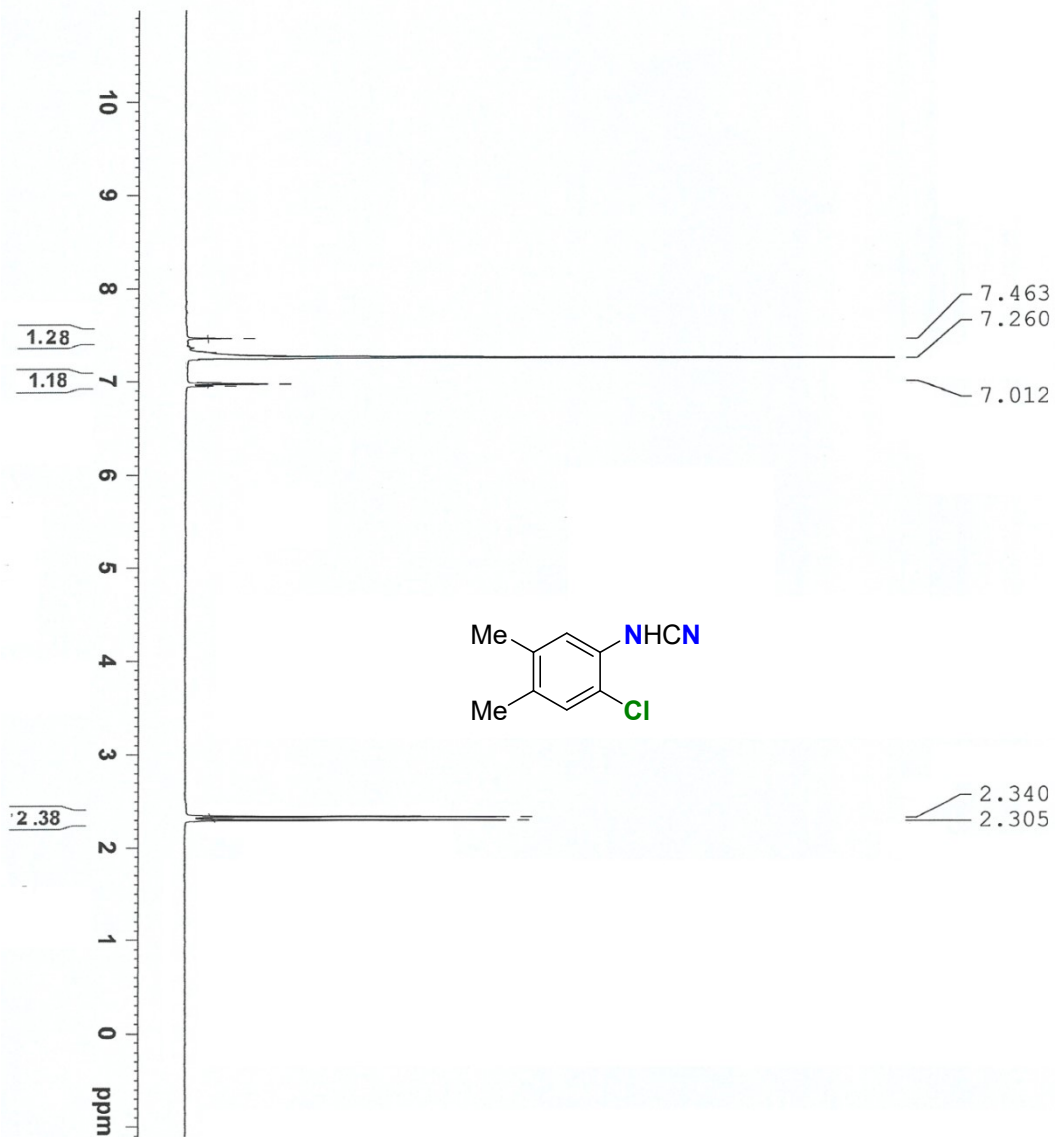

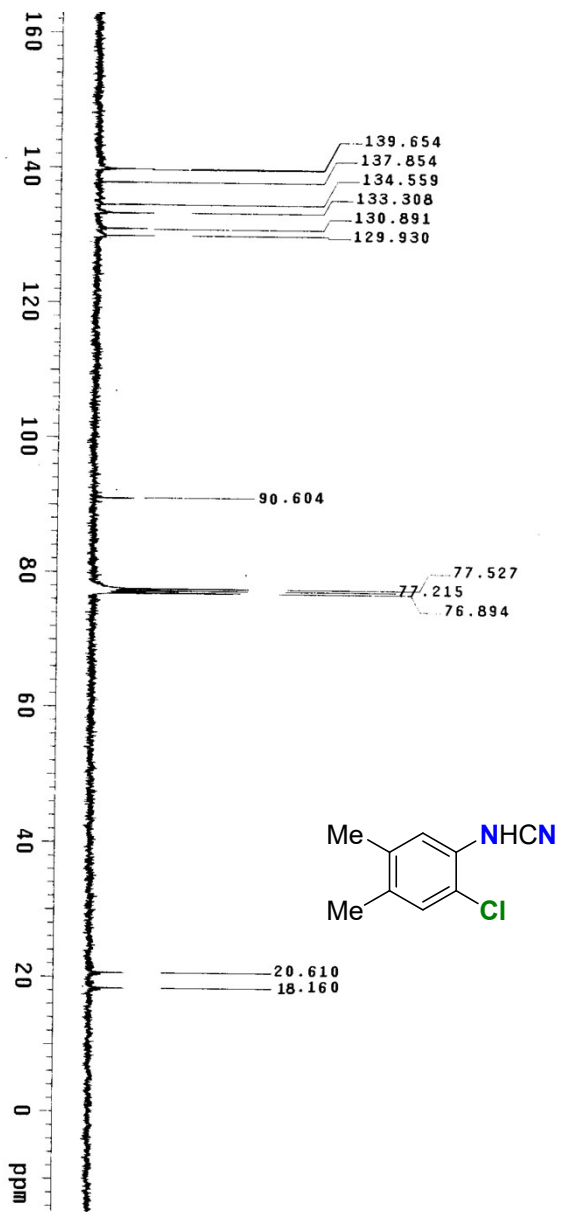

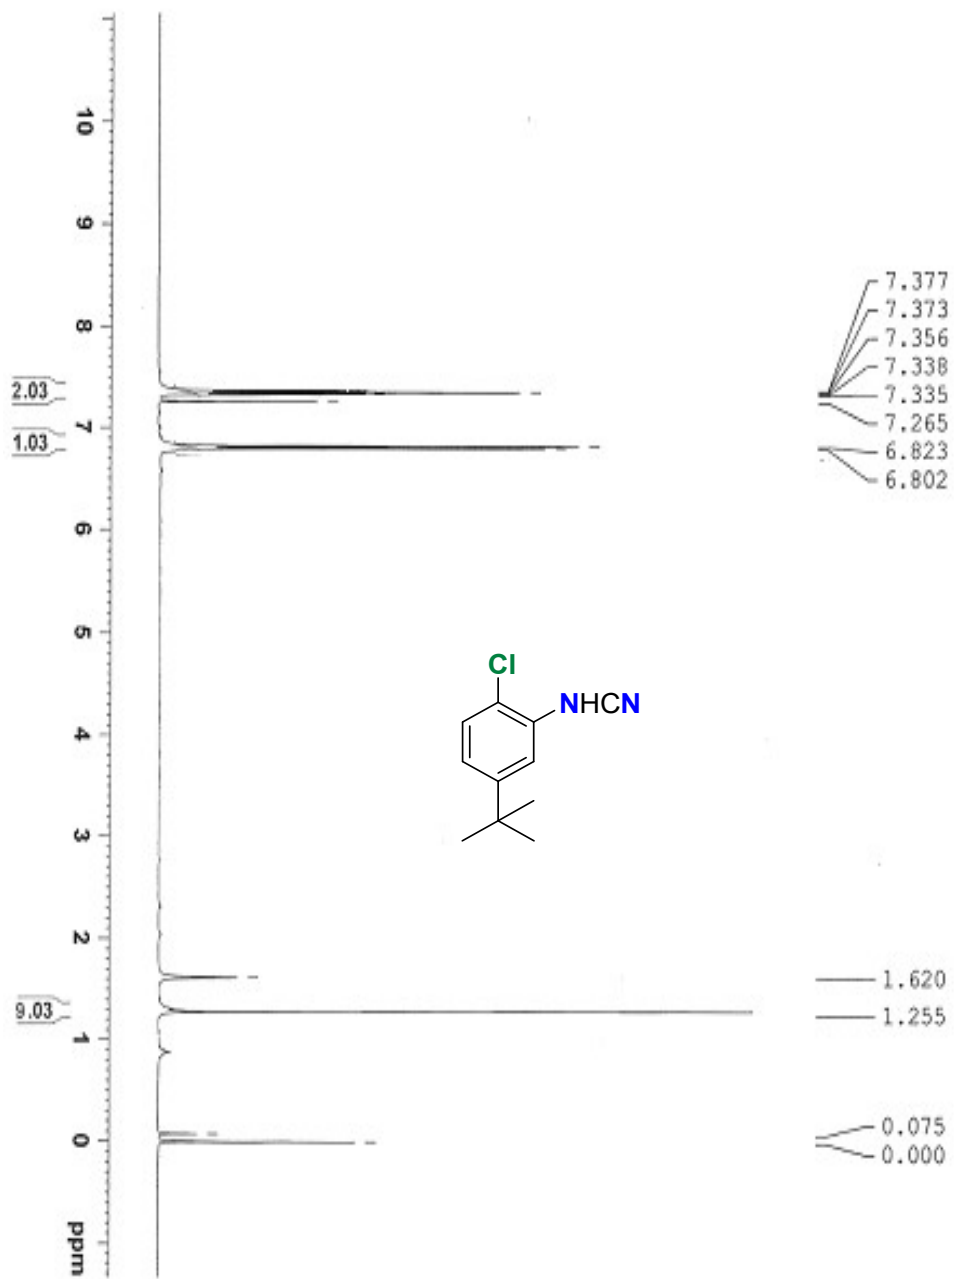



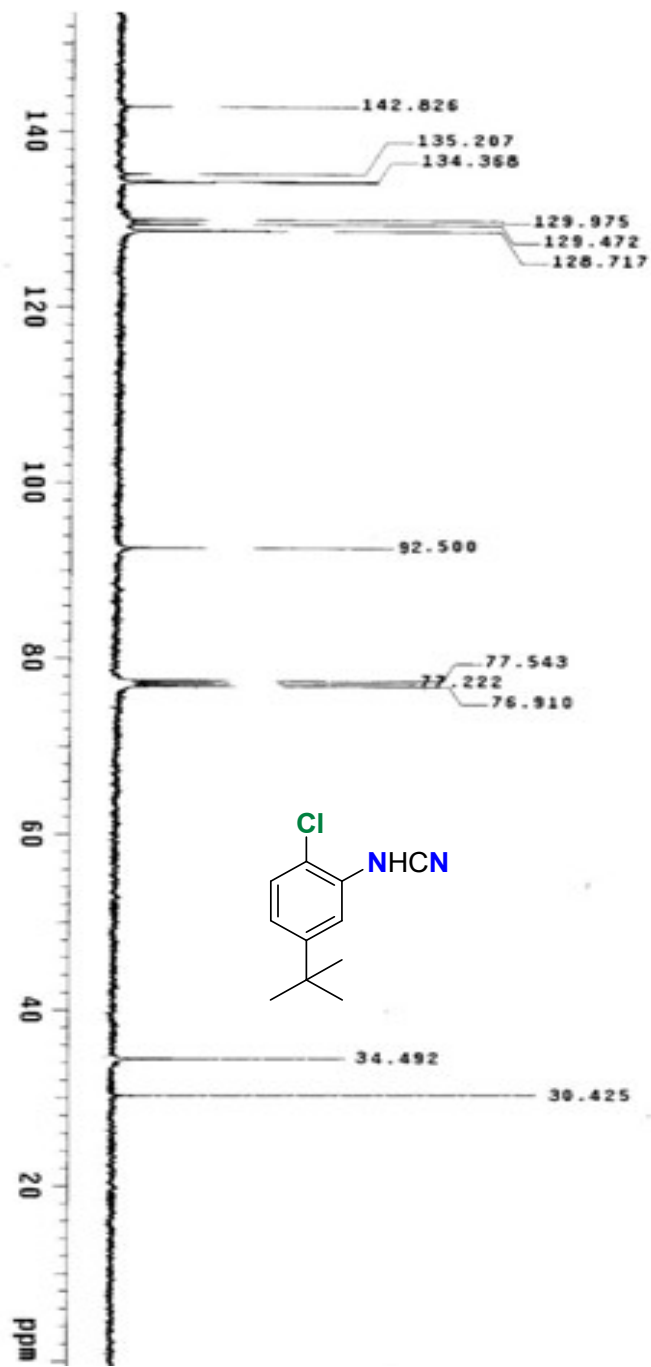

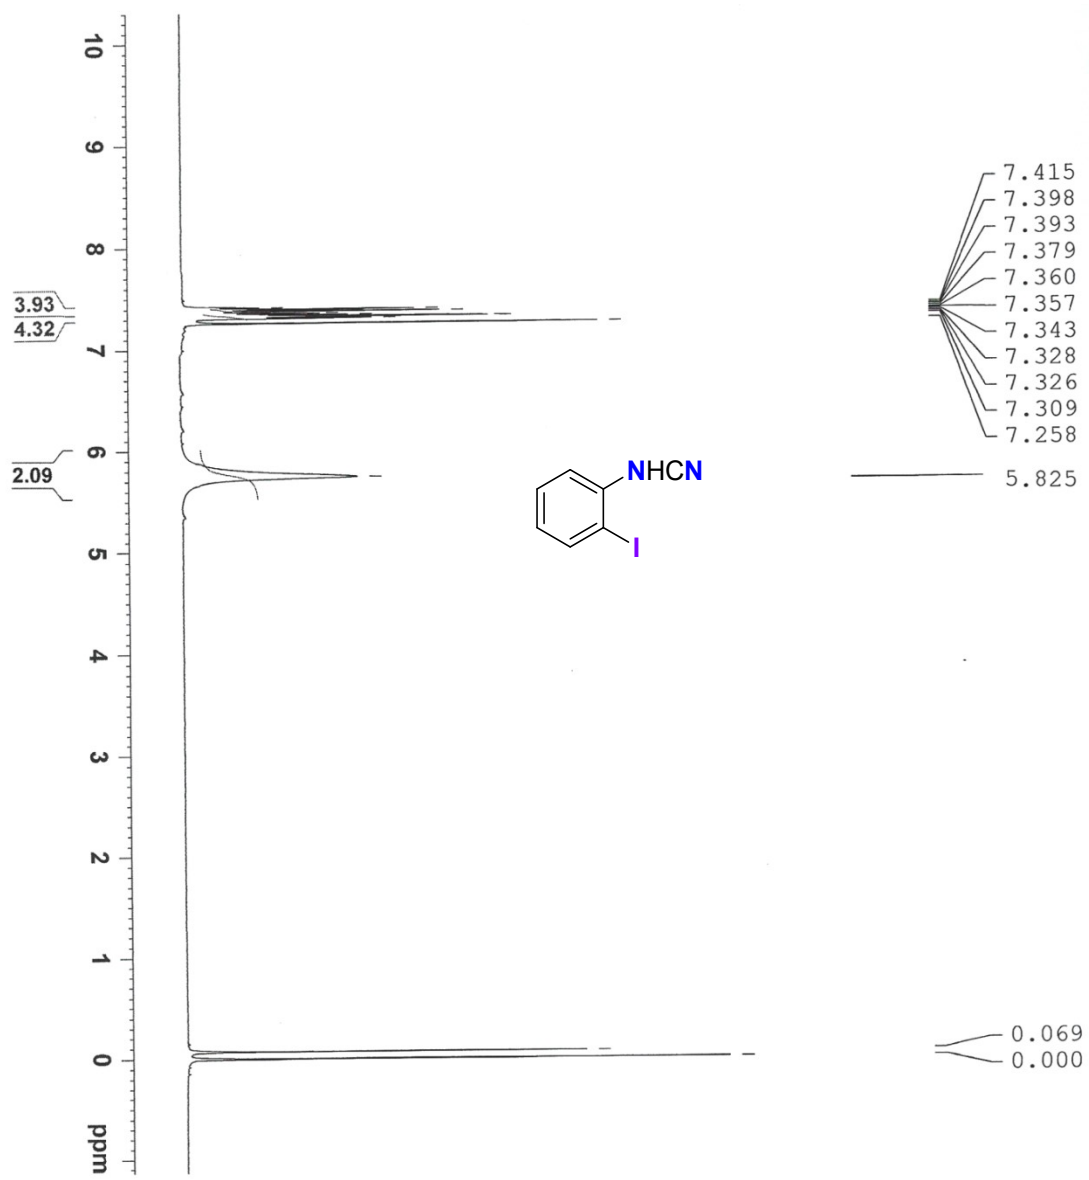

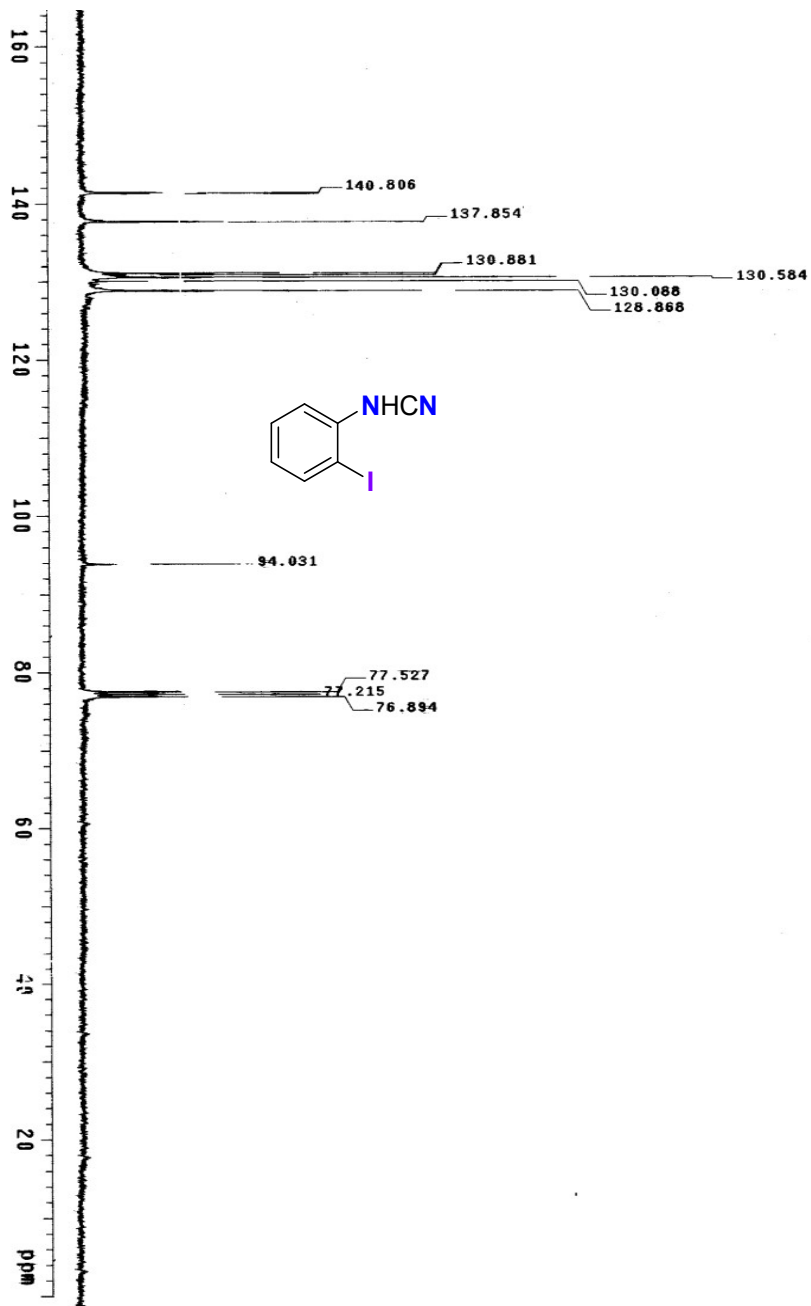

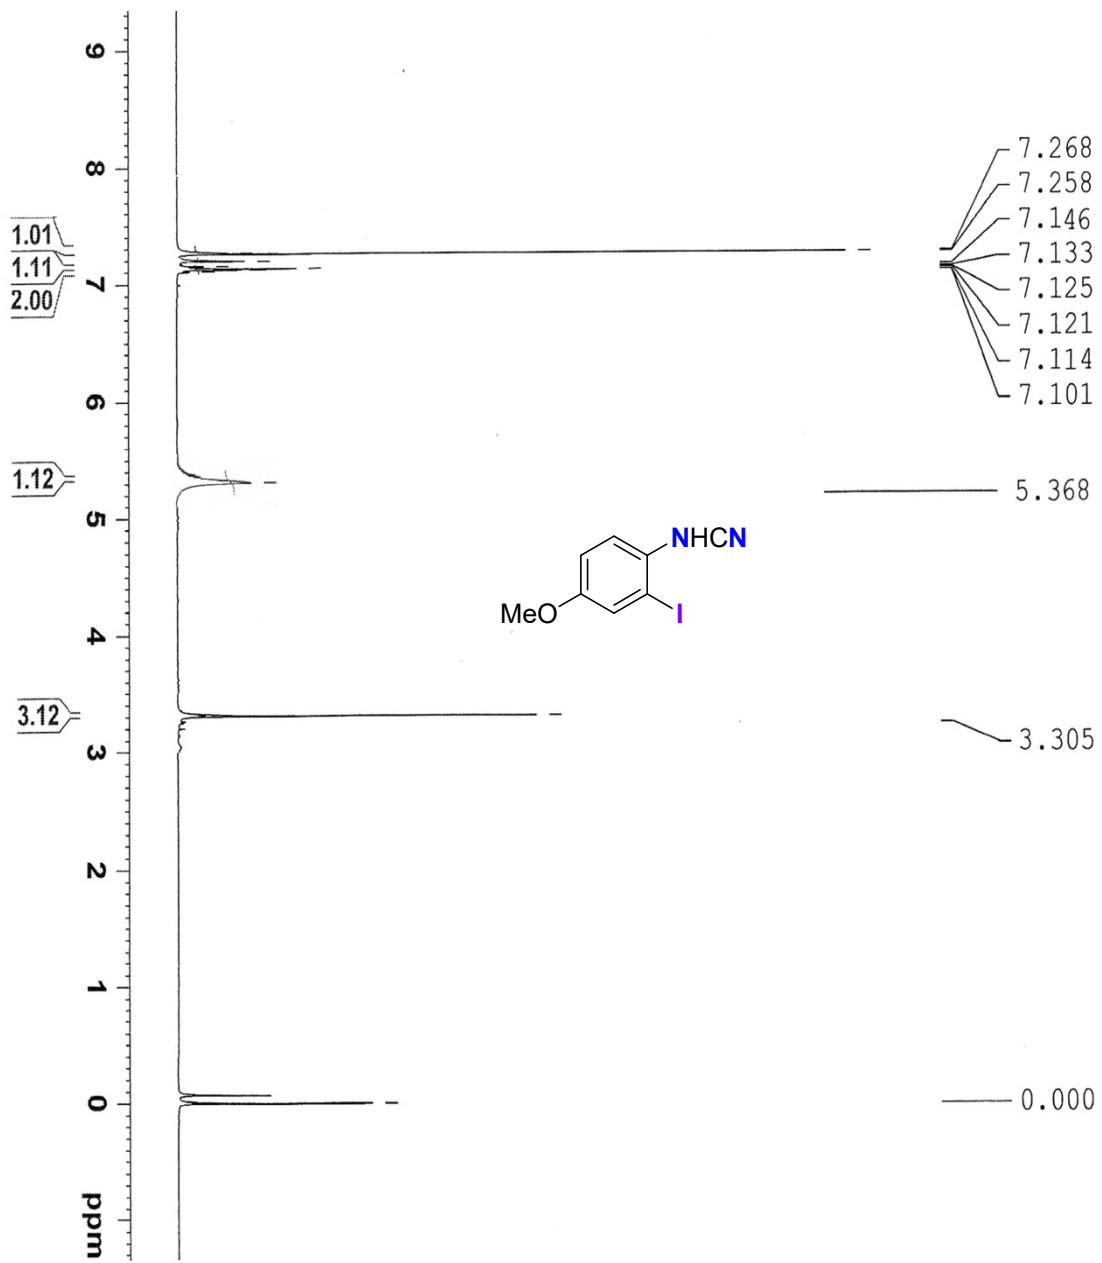

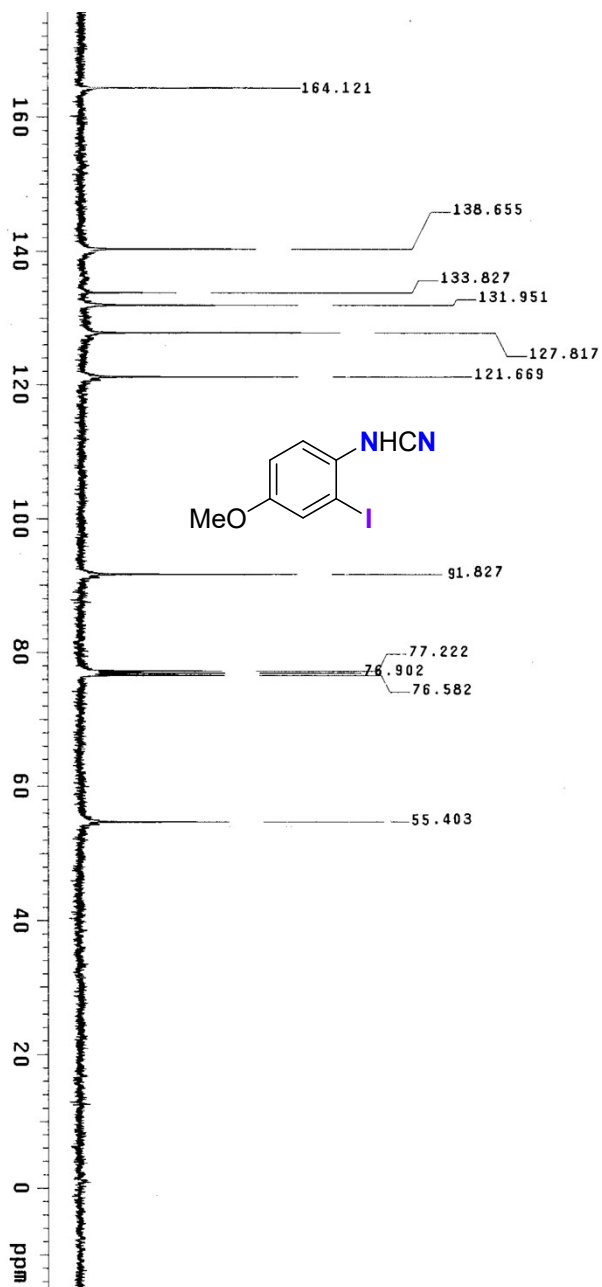

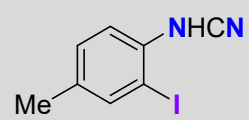

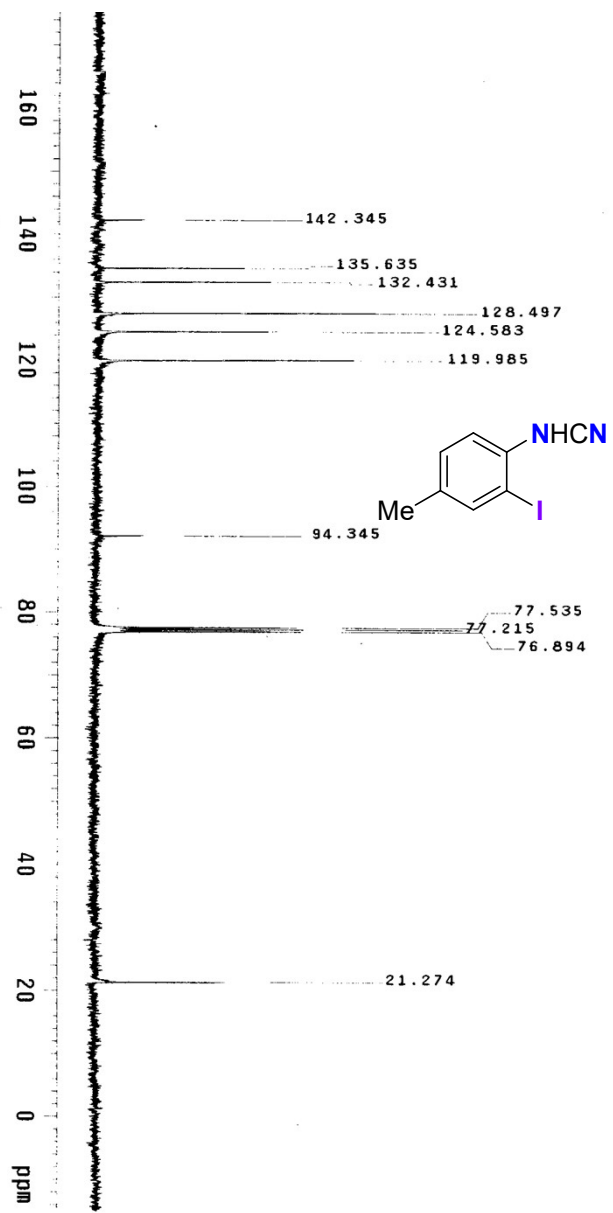

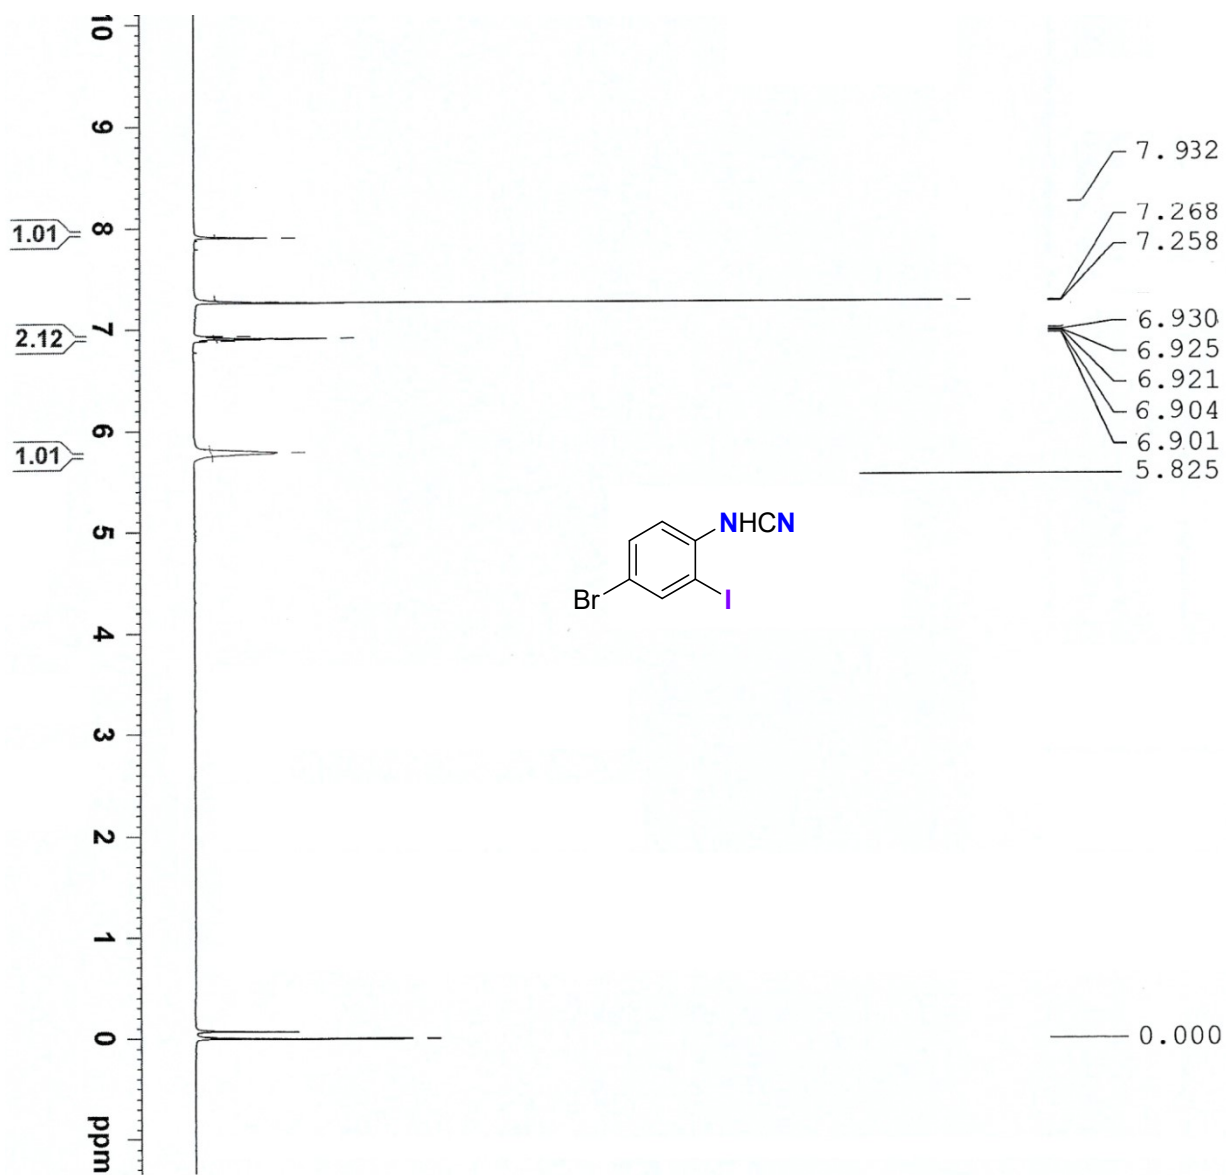



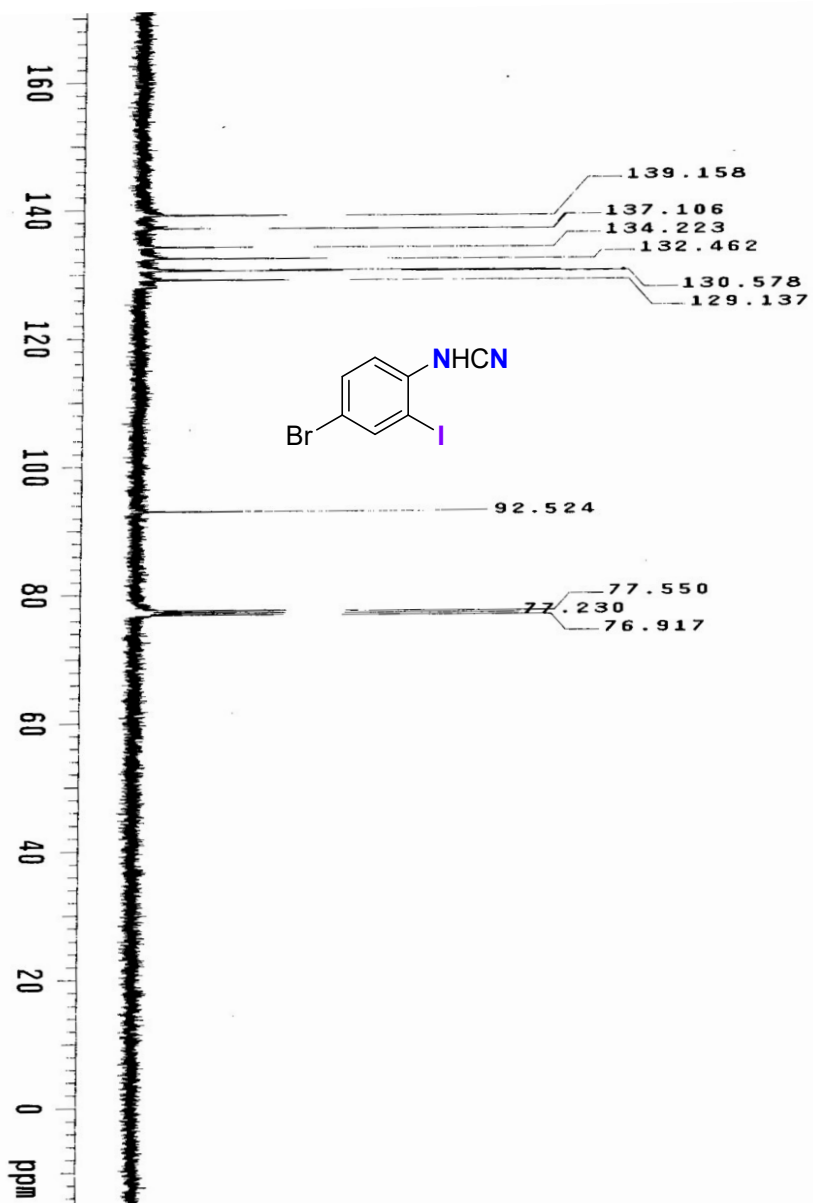

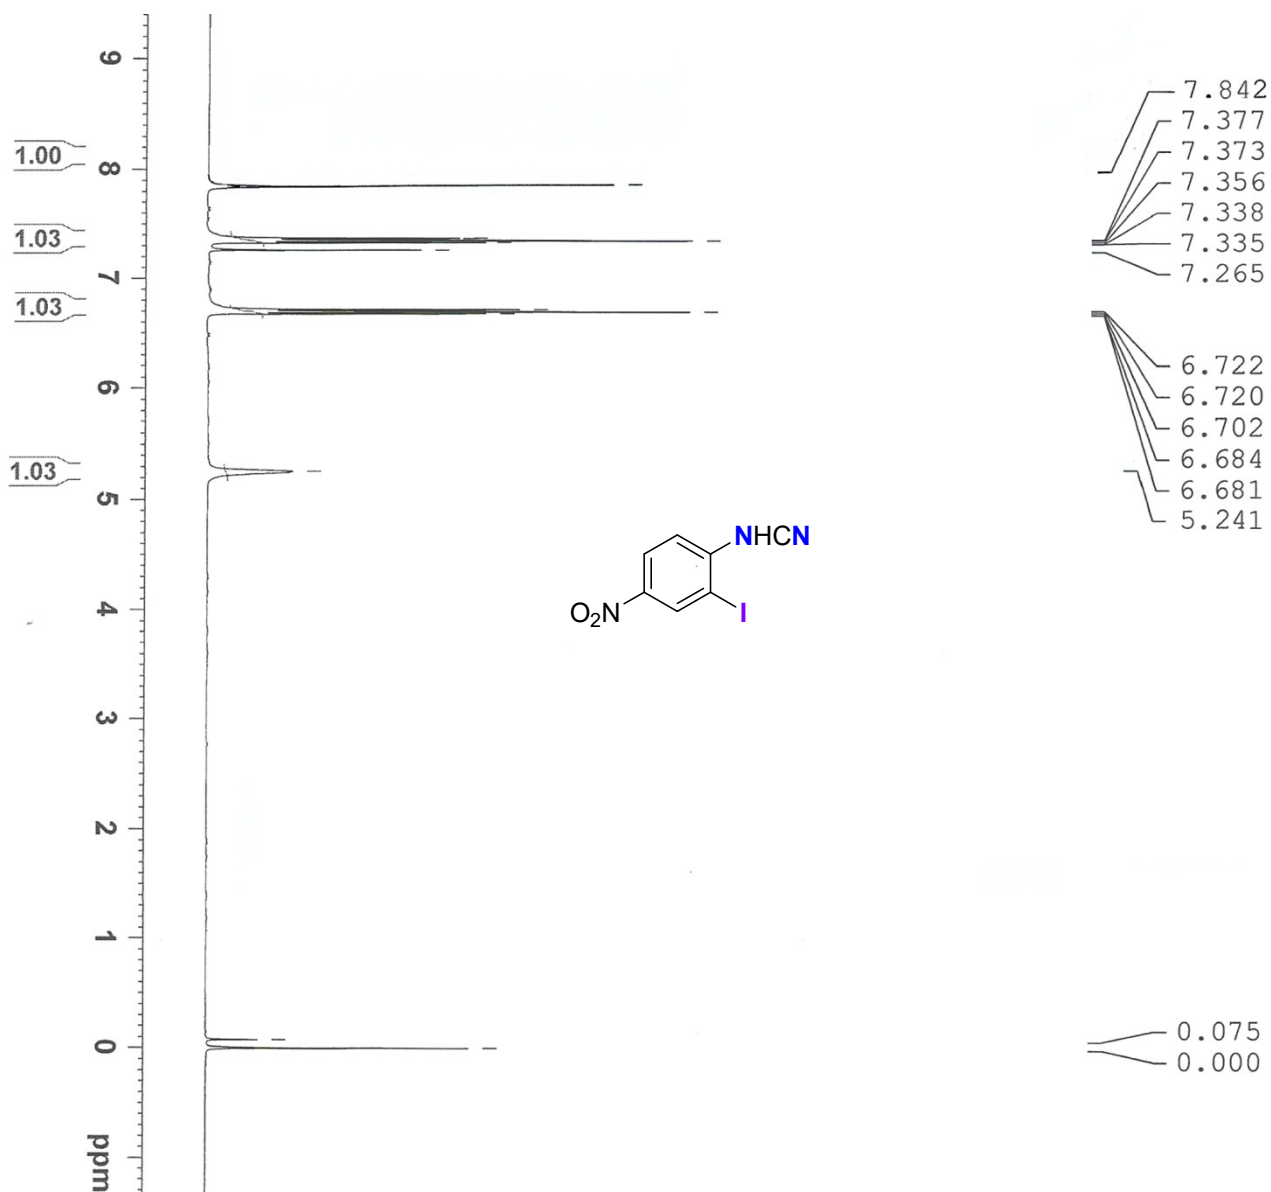

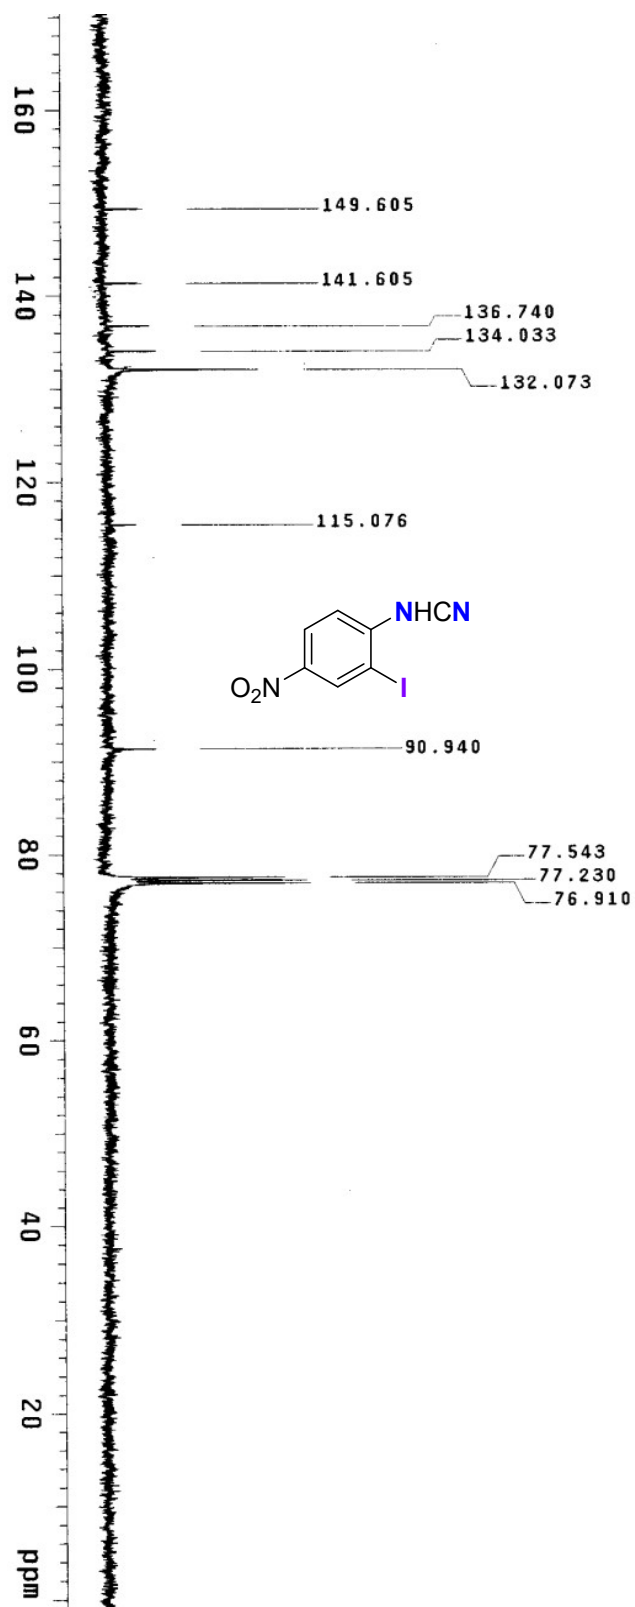

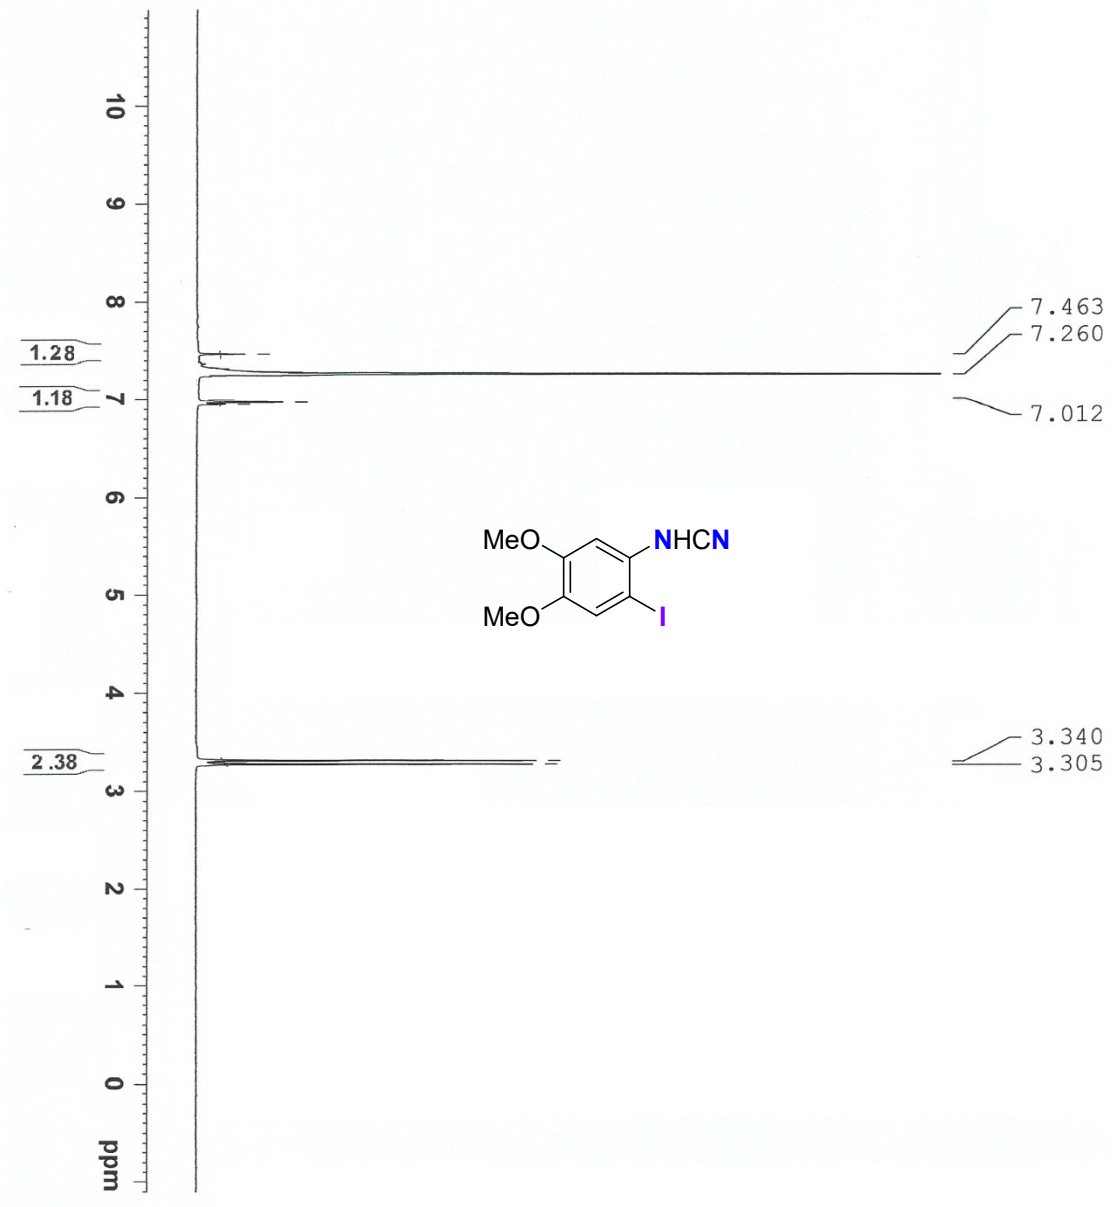

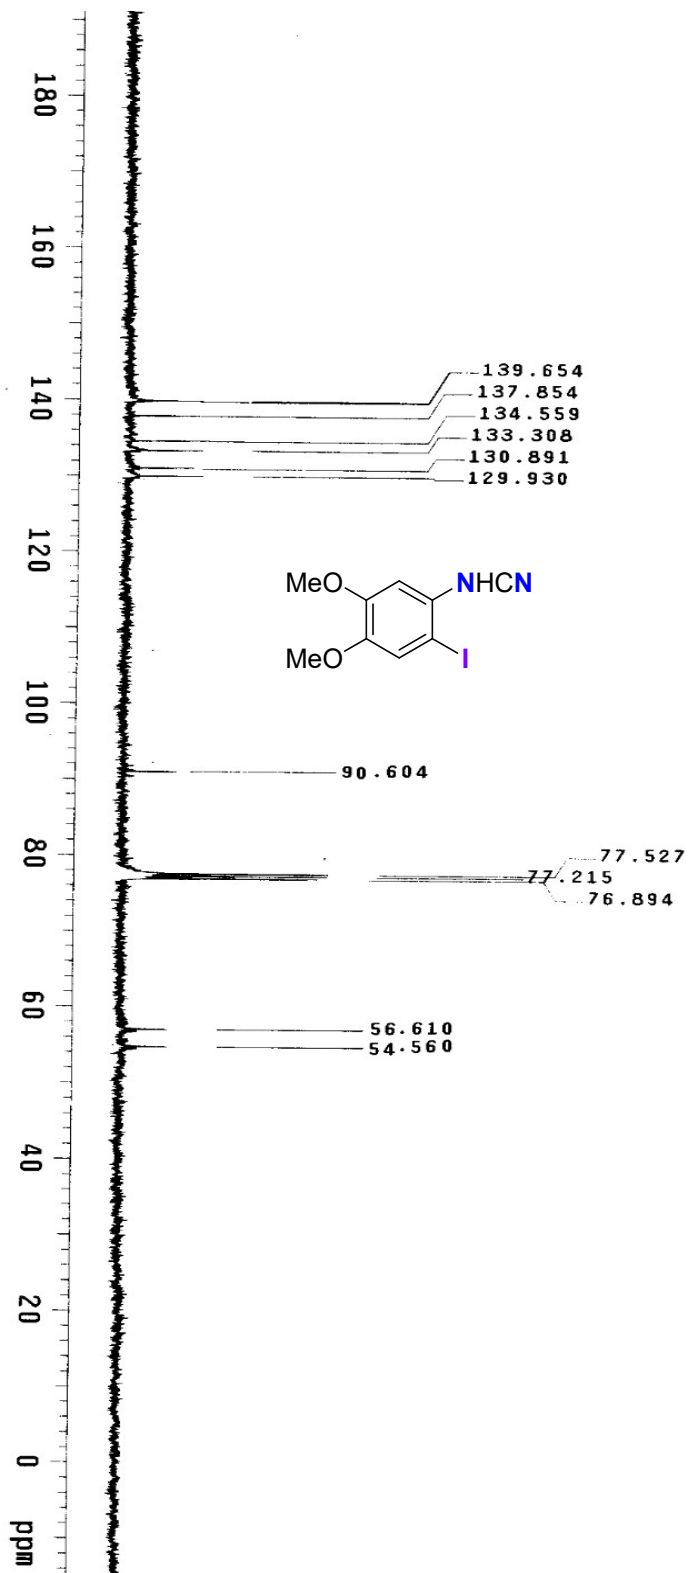

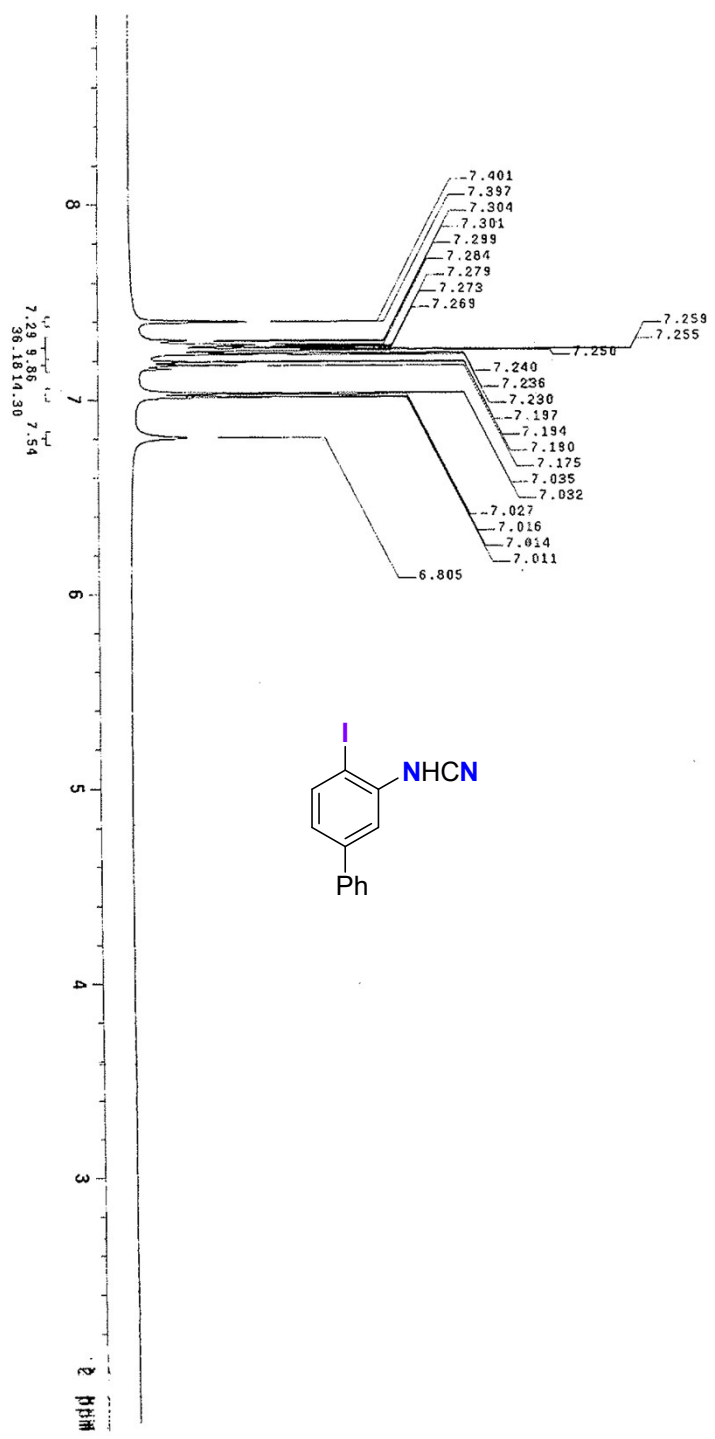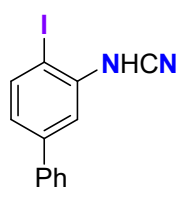

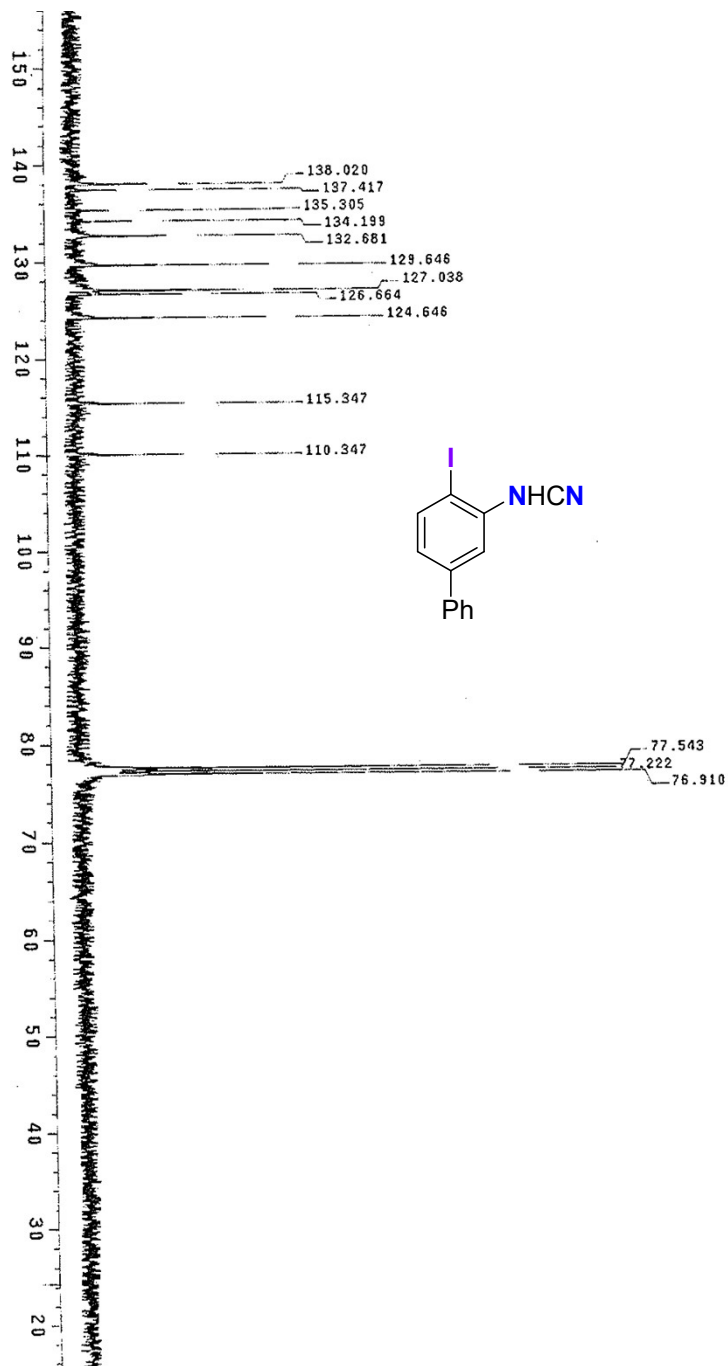





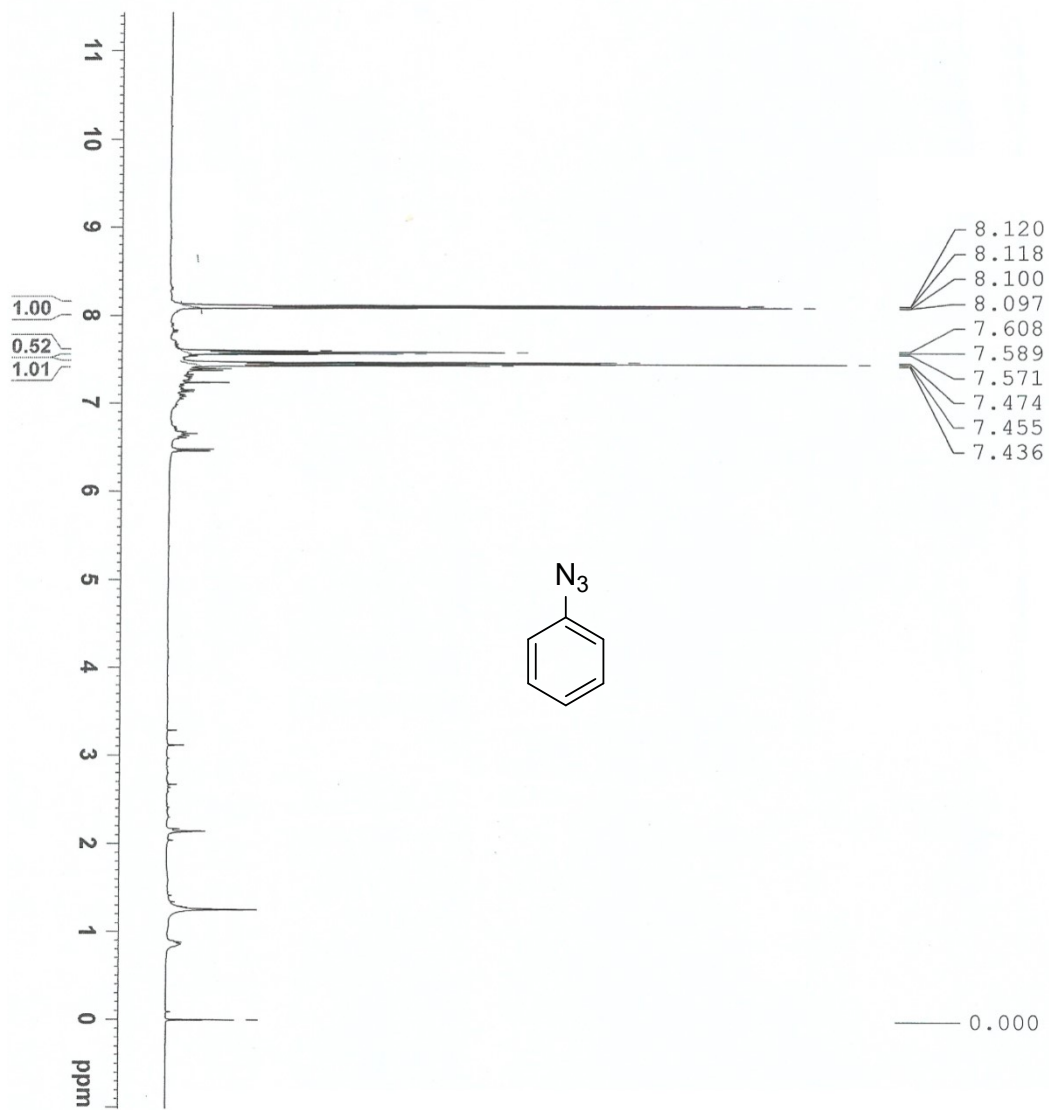

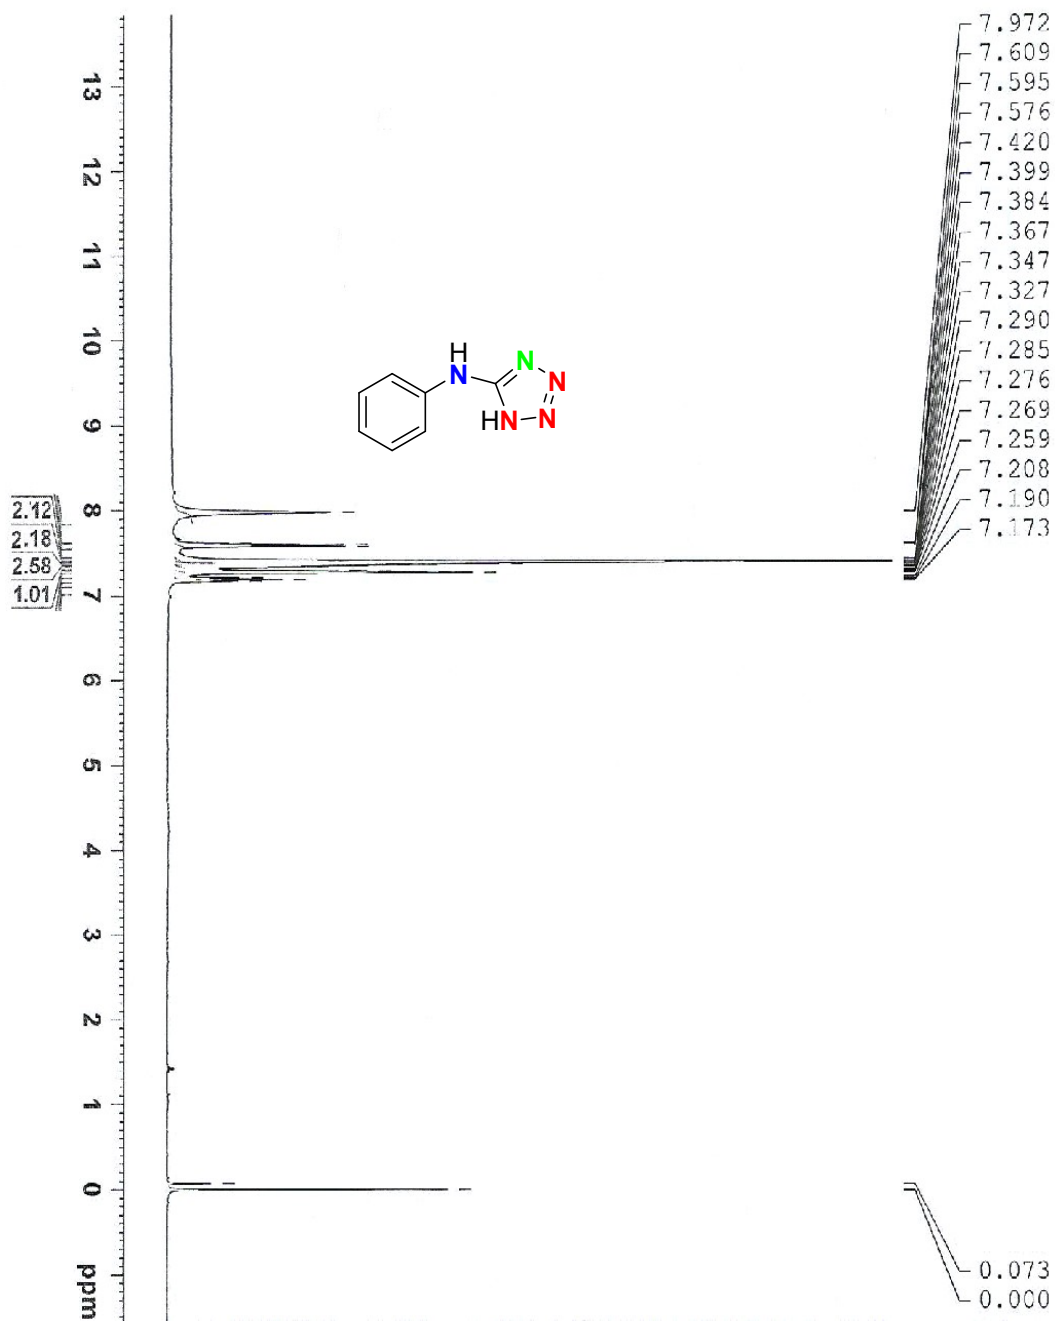

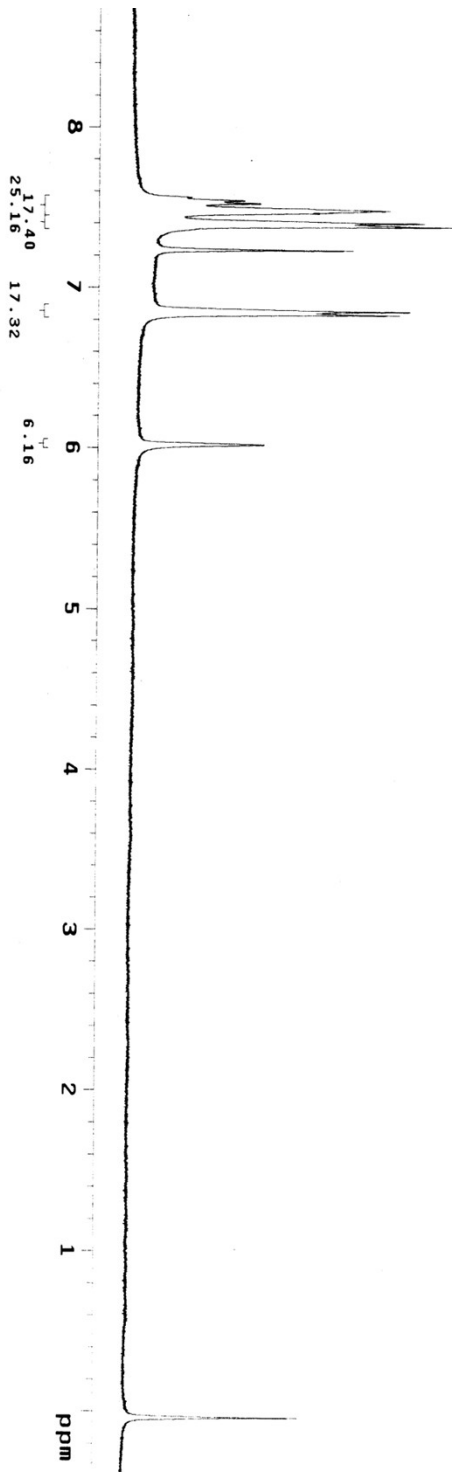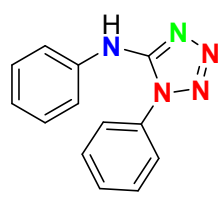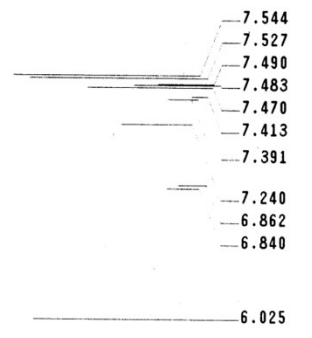

-0.026

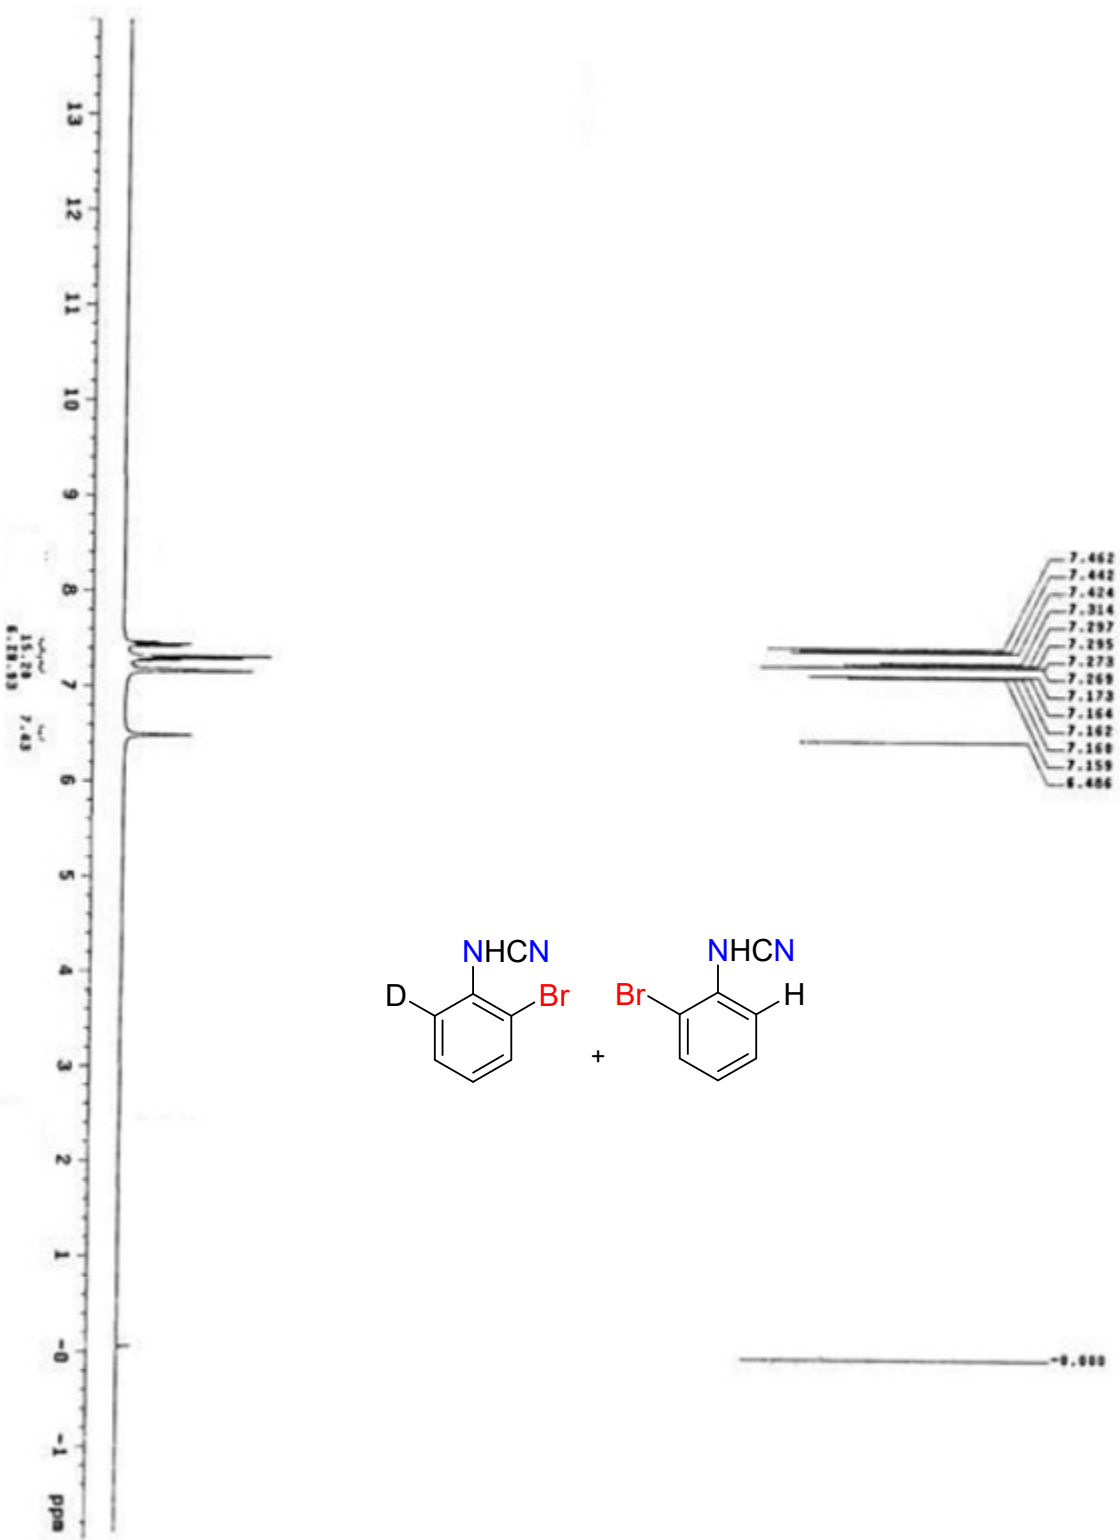

Supplement: d1nj01998h1.pdf [file d1nj01998h1.pdf]
